# Supplementary material for: NIS-mediated intramolecular oxidative α-functionalization of tertiary amines: transition metal-free synthesis of 1,2-dihydro-(4H)-3,1-benzoxazin-4-one derivatives
Source: Royal Society of Chemistry journal article supplement (doi:10.1039/c5ra03882k), 2015-01-01

## Electronic Supplementary Information

### **NIS-Mediated Intramolecular Oxidative $\alpha$ -Functionalization of Tertiary Amines: Transition Metal-free Synthesis of 1,2-Dihydro-(4*H*)-3,1-benzoxazin-4-one Derivatives**

Le Liu, Liang Du, Daisy Zhang-Negrerie and Yunfei Du\*

*†School of Pharmaceutical Science and Technology, Tianjin University, Tianjin 300072, China.*

*duyunfeier@tju.edu.cn*

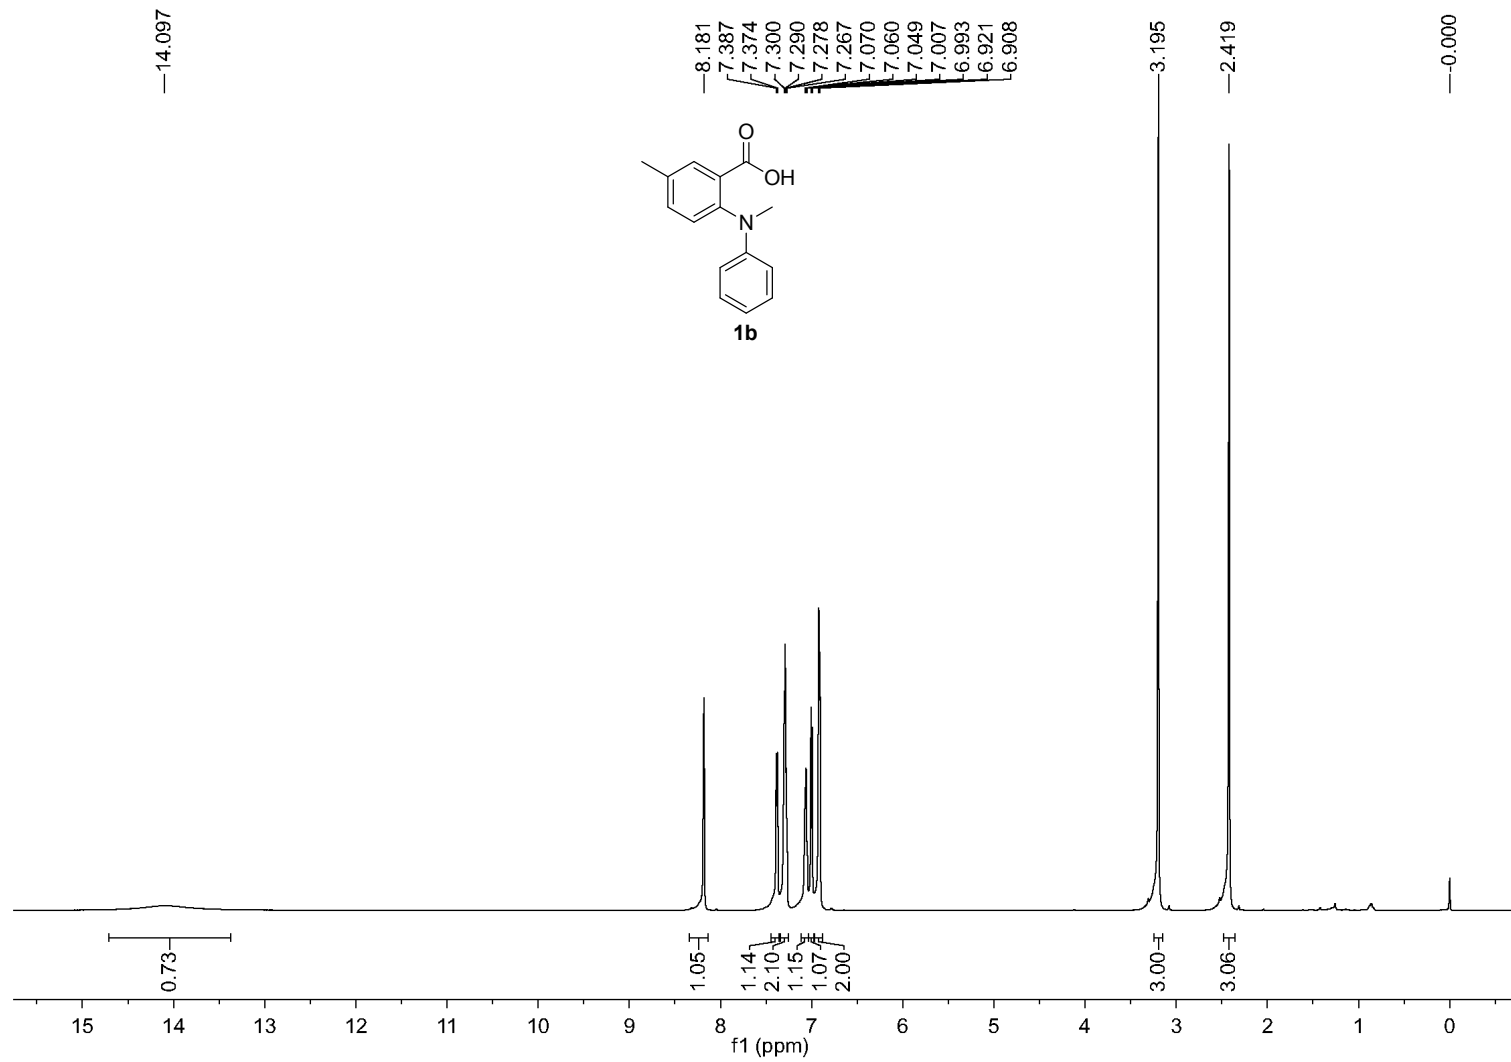

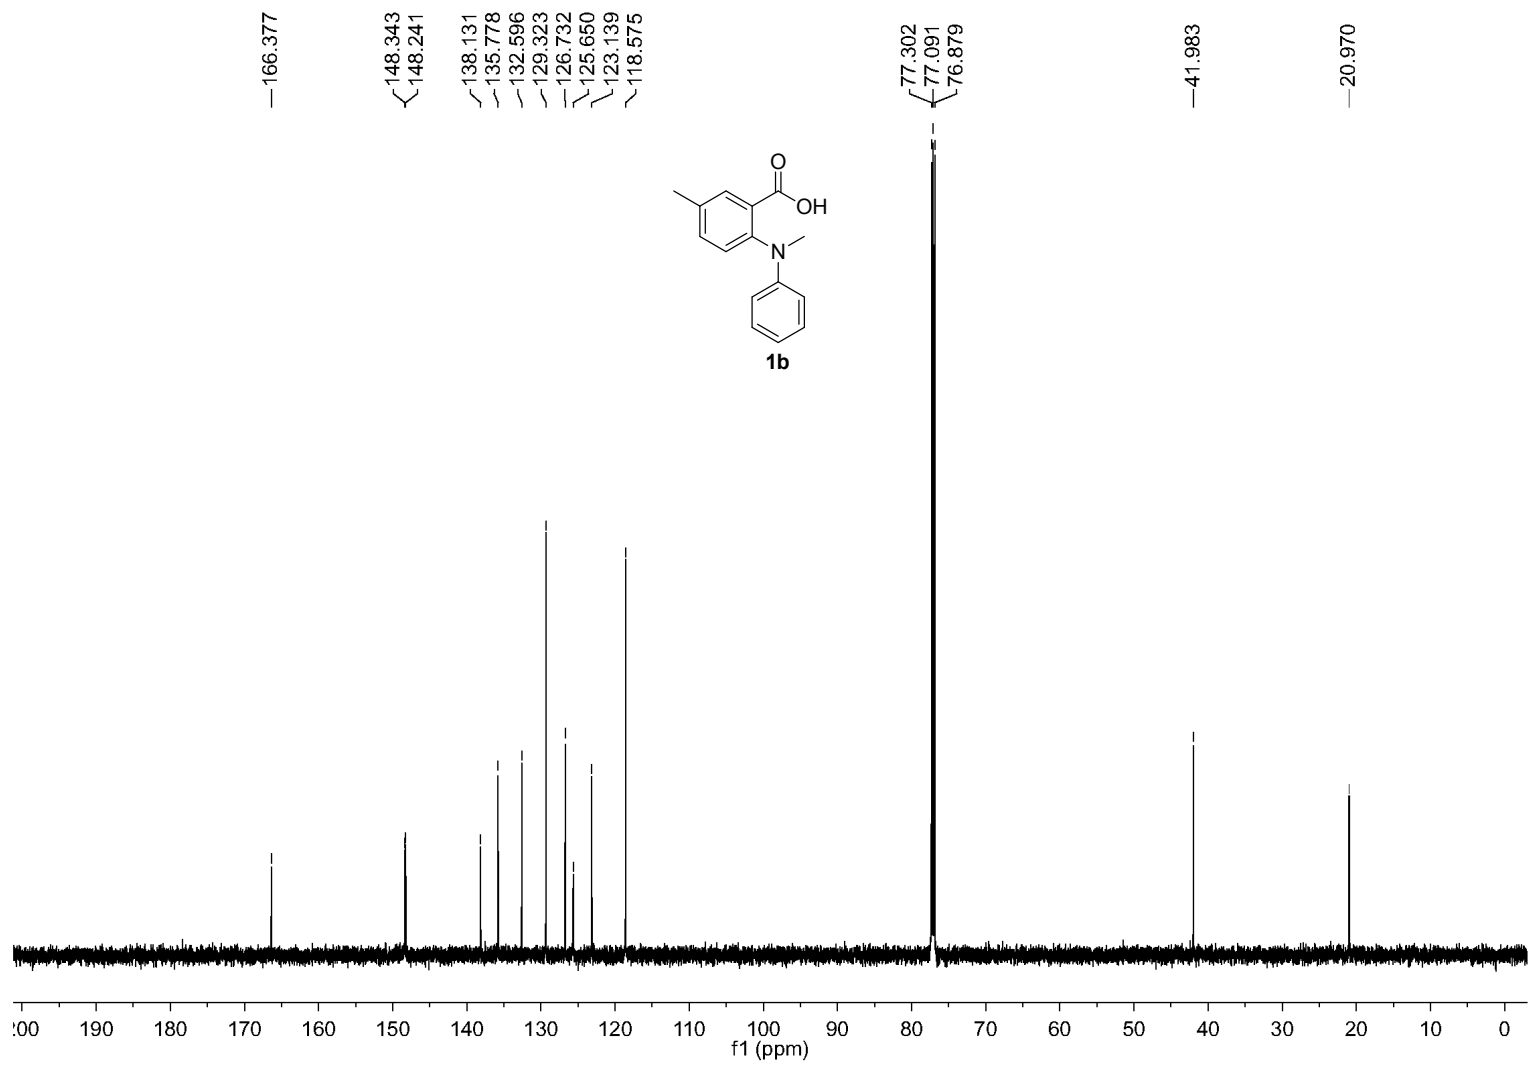

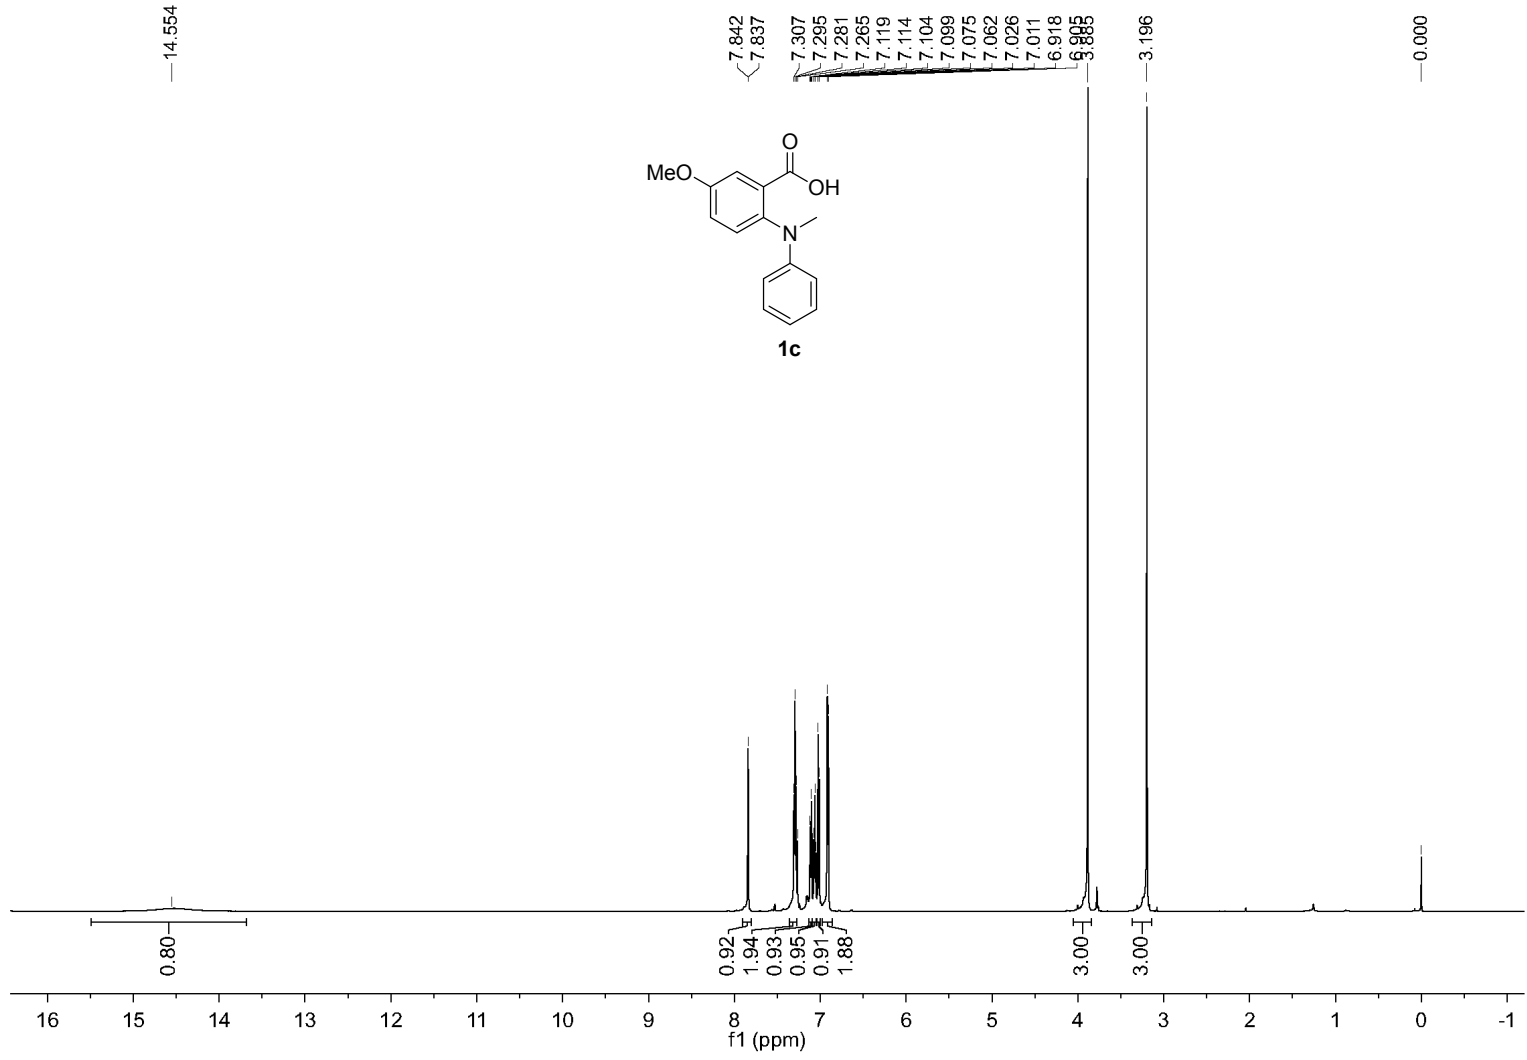

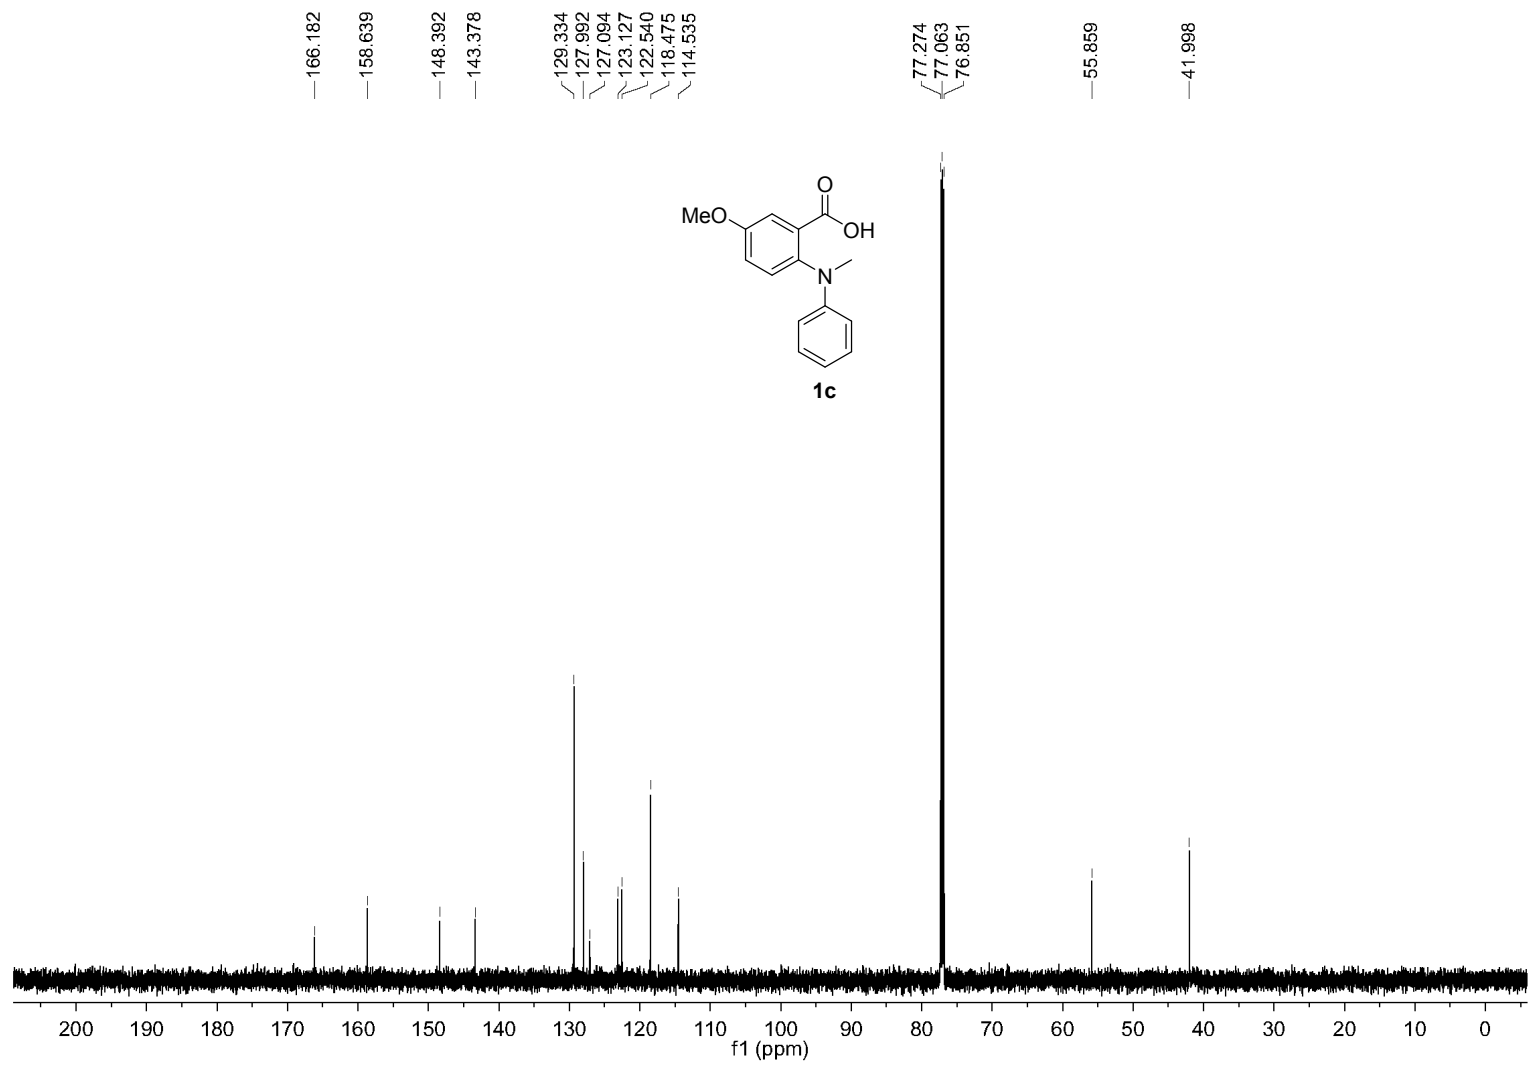

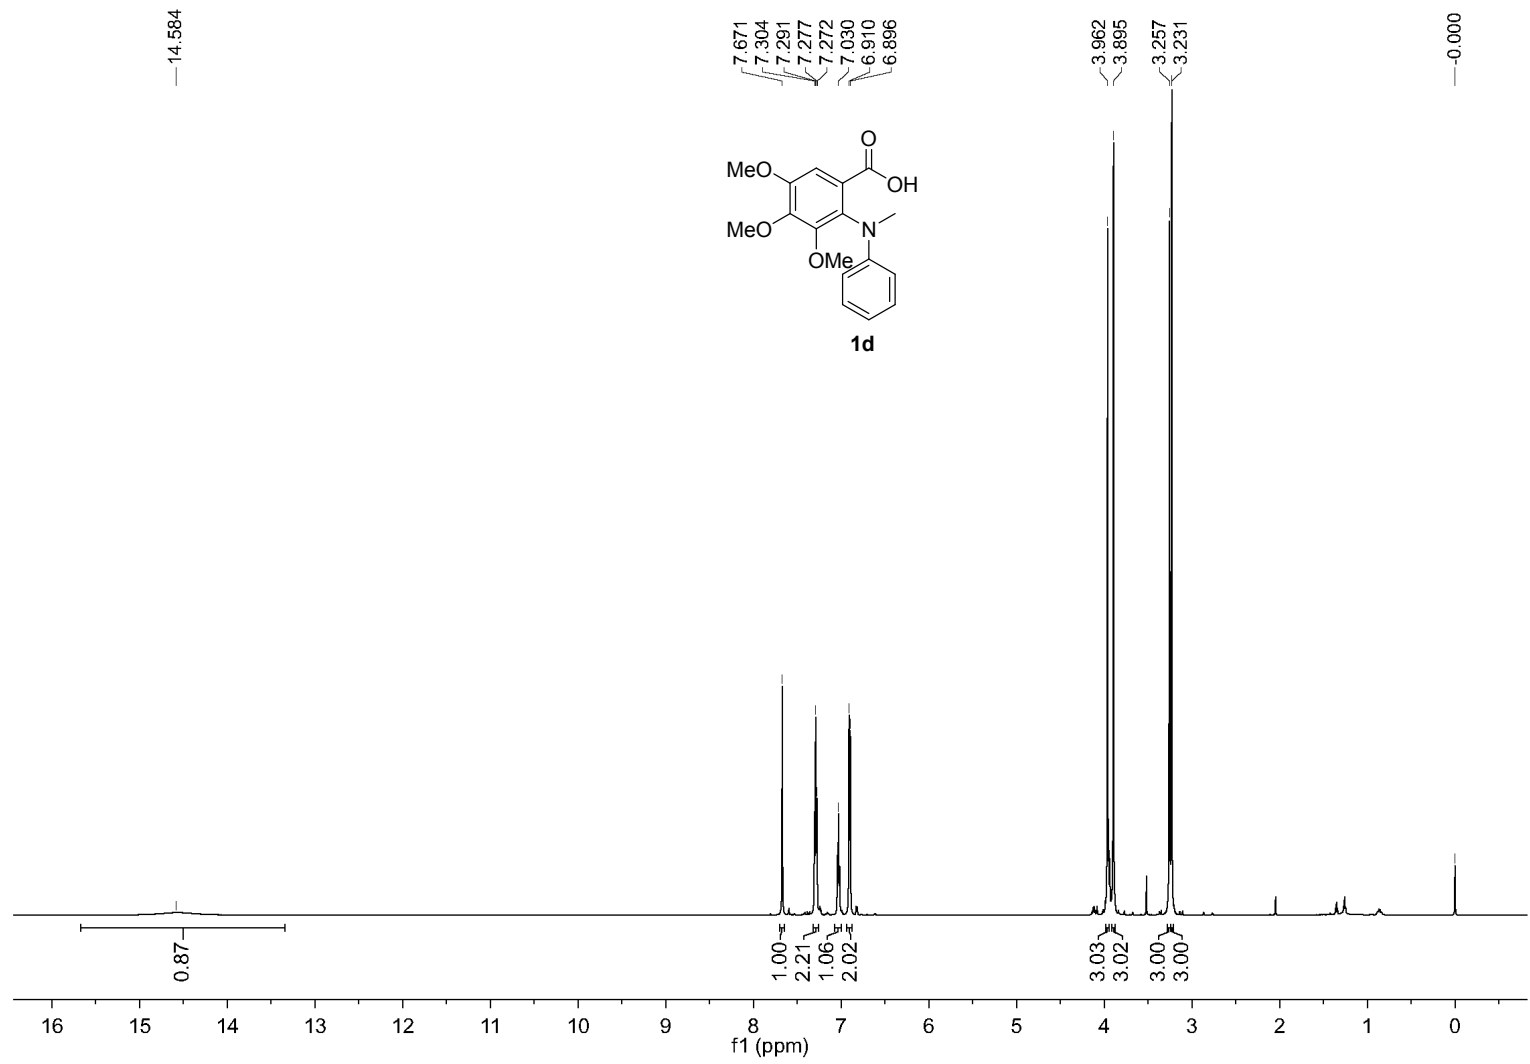

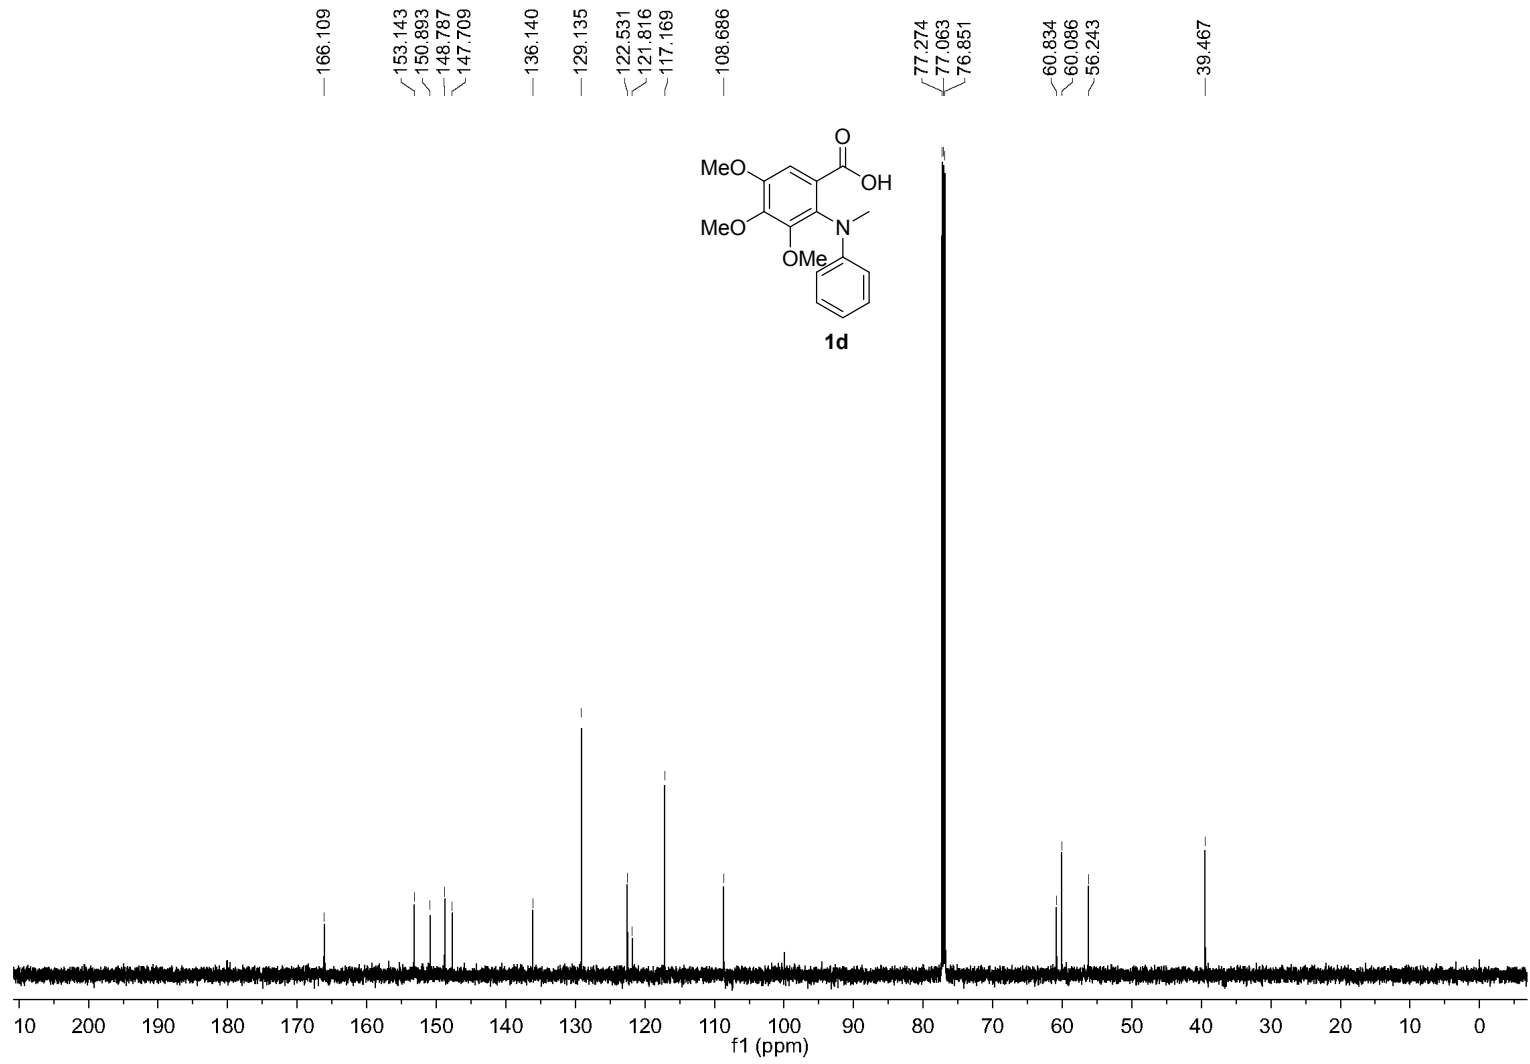

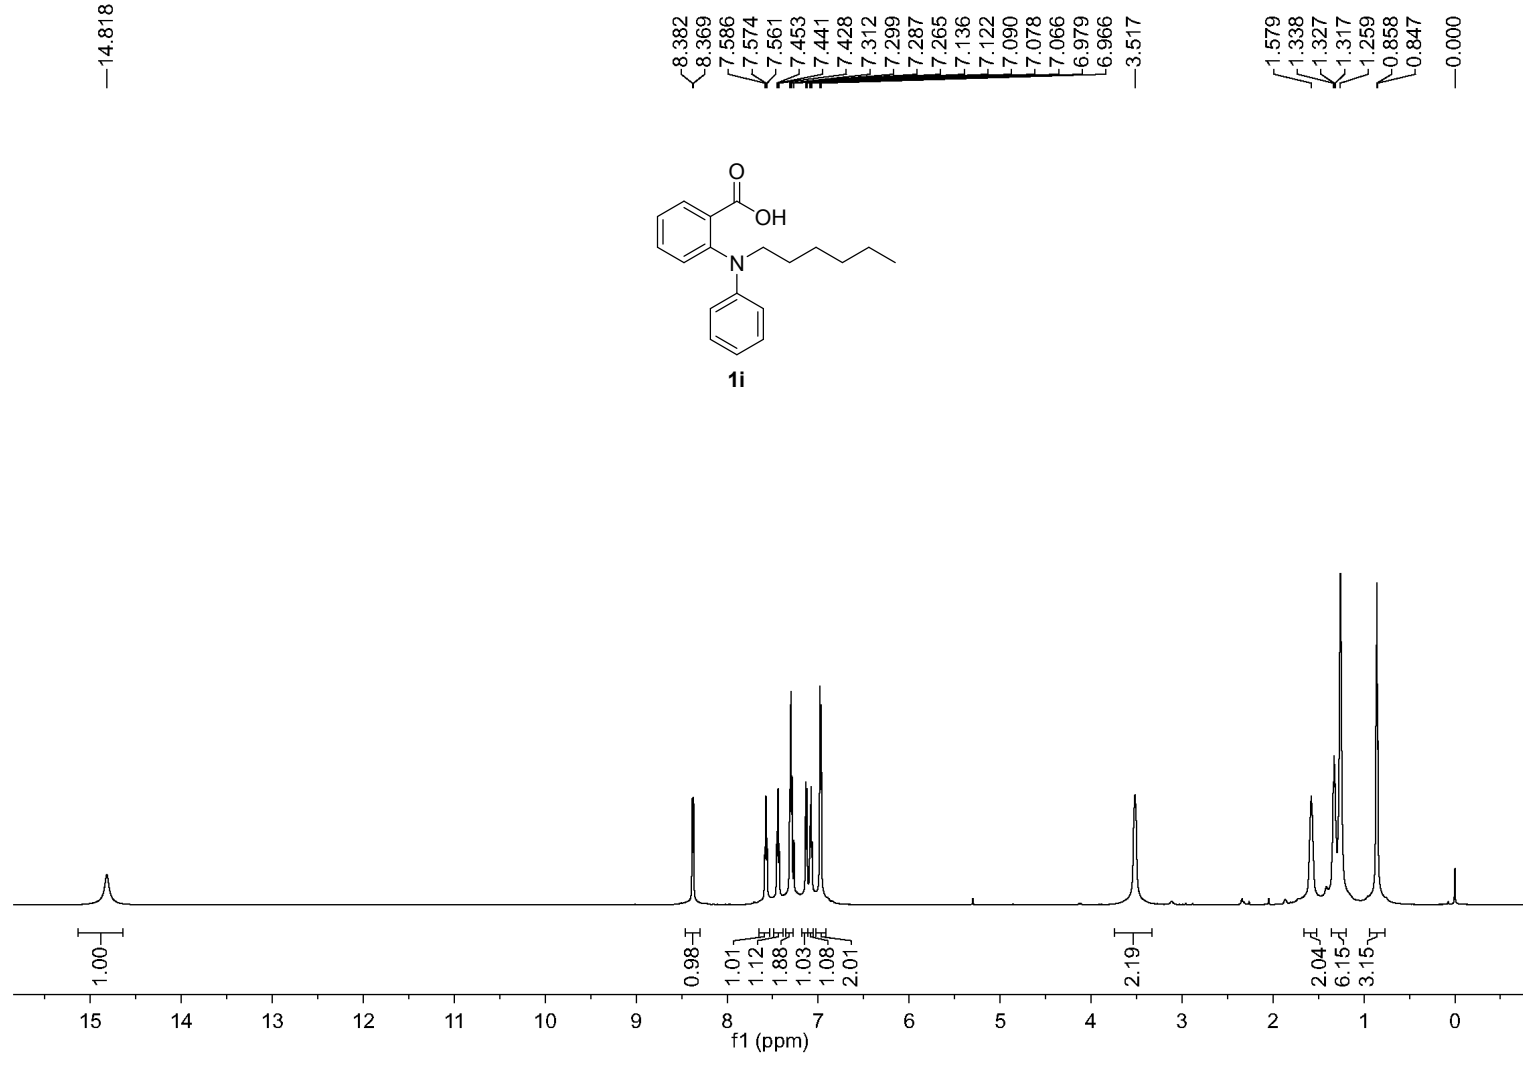



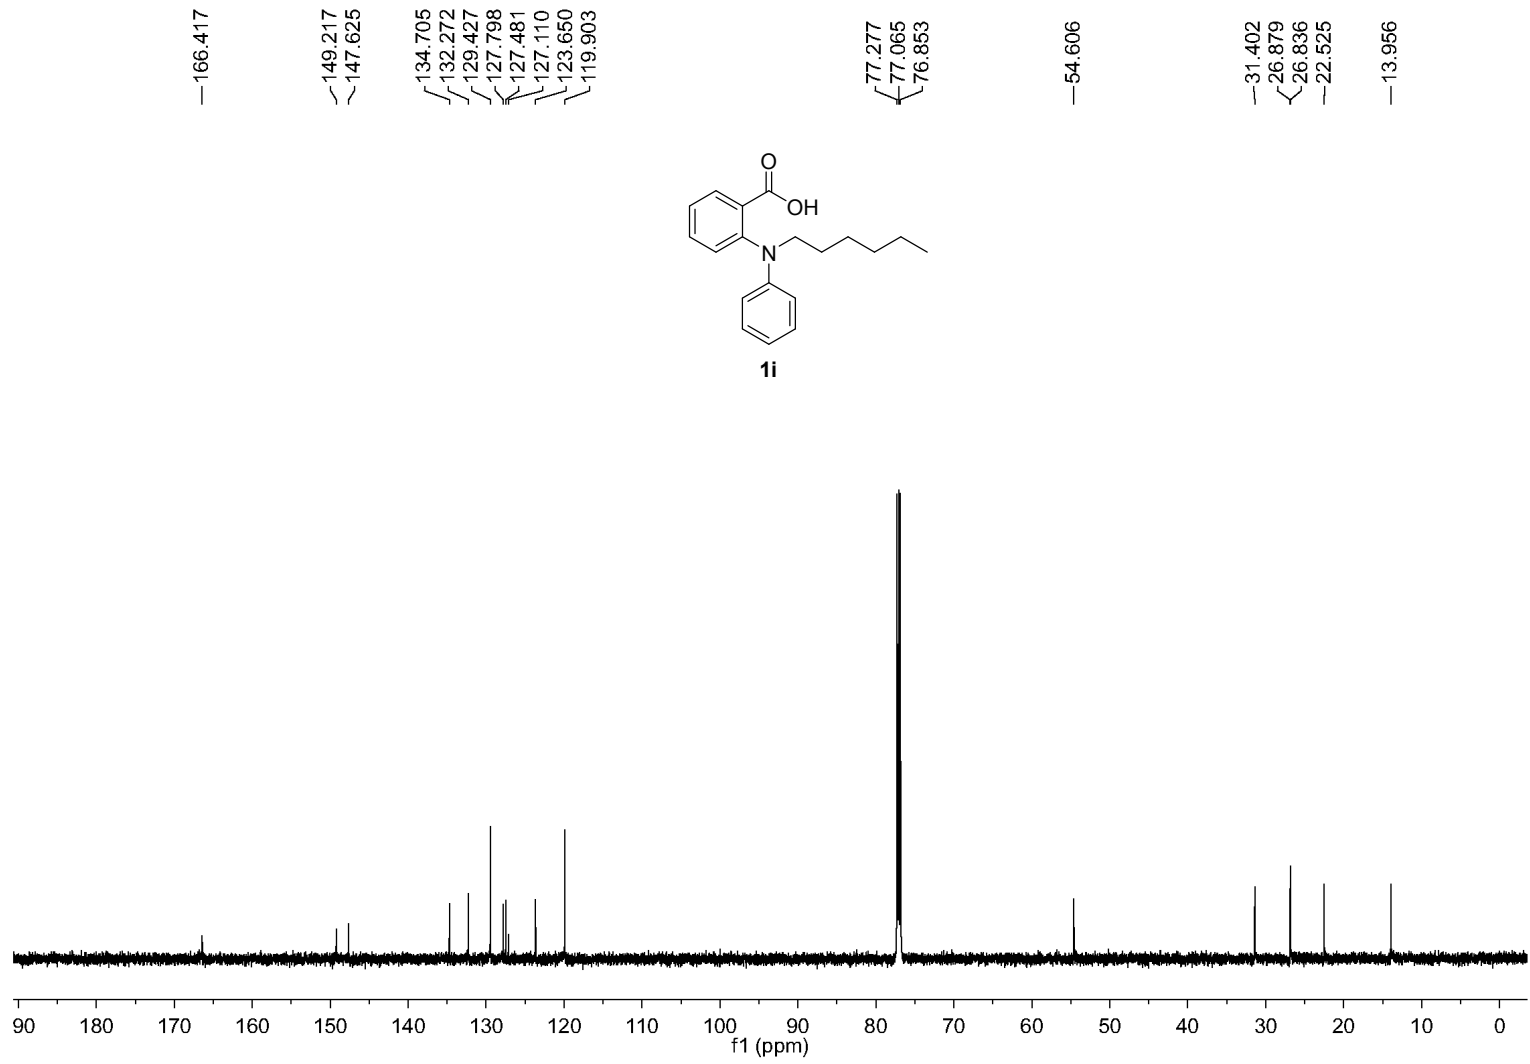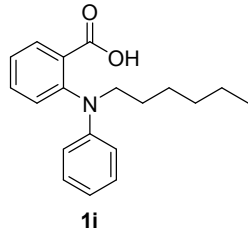

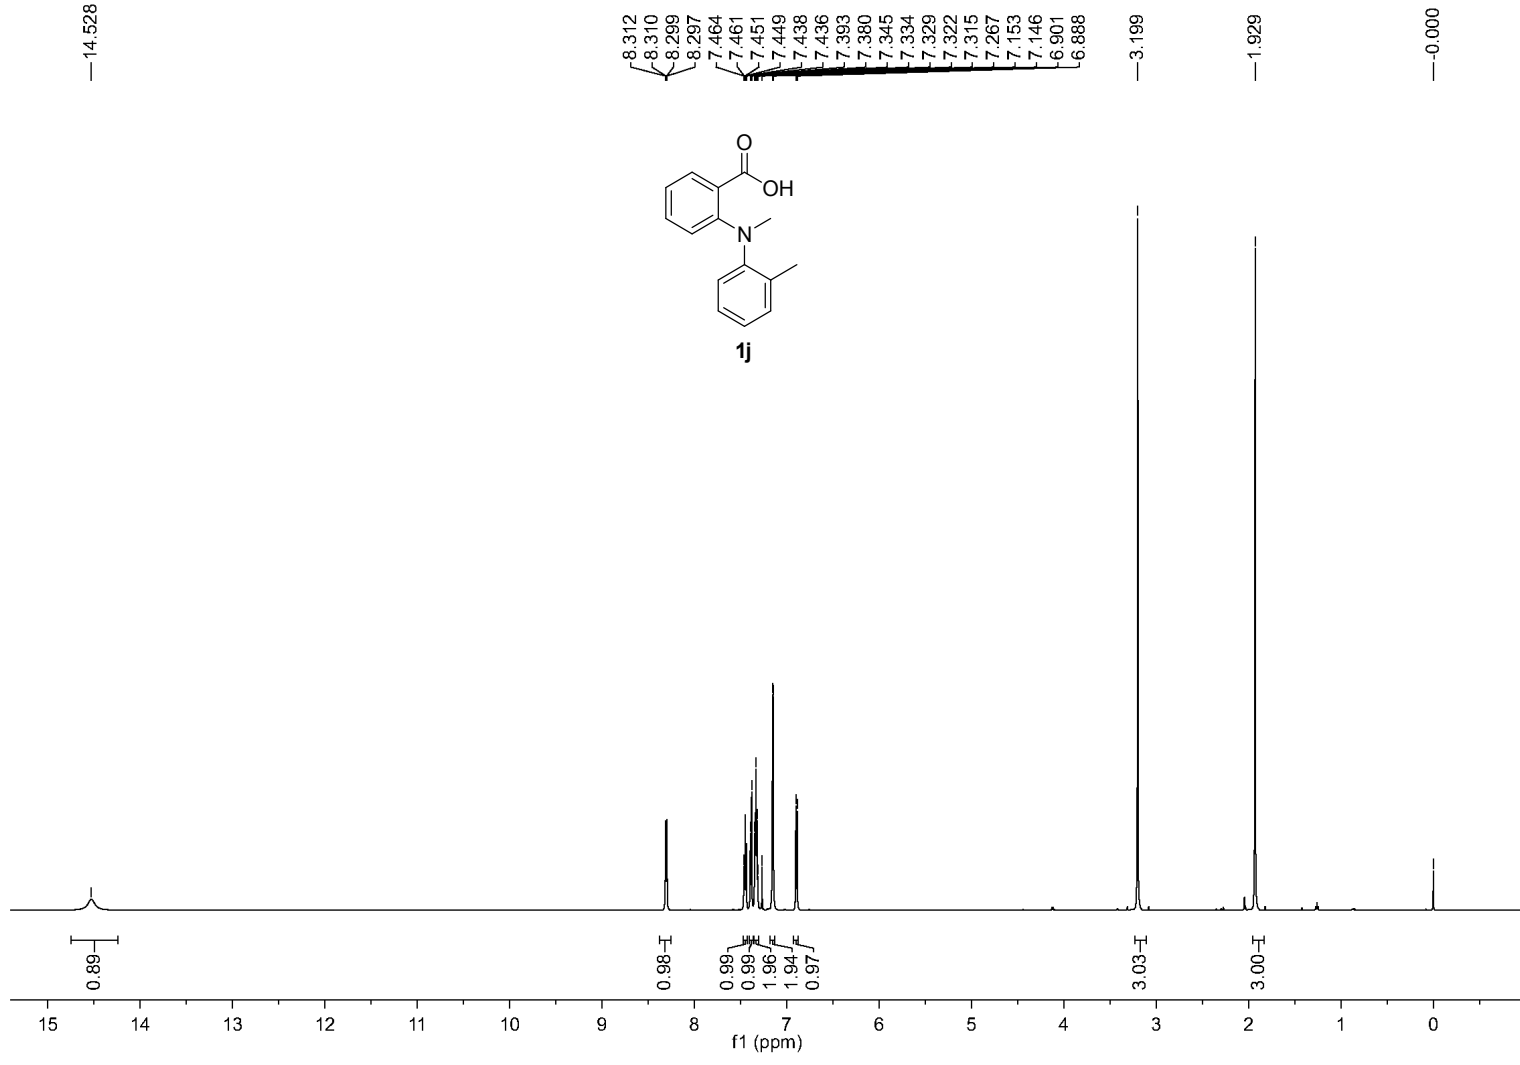

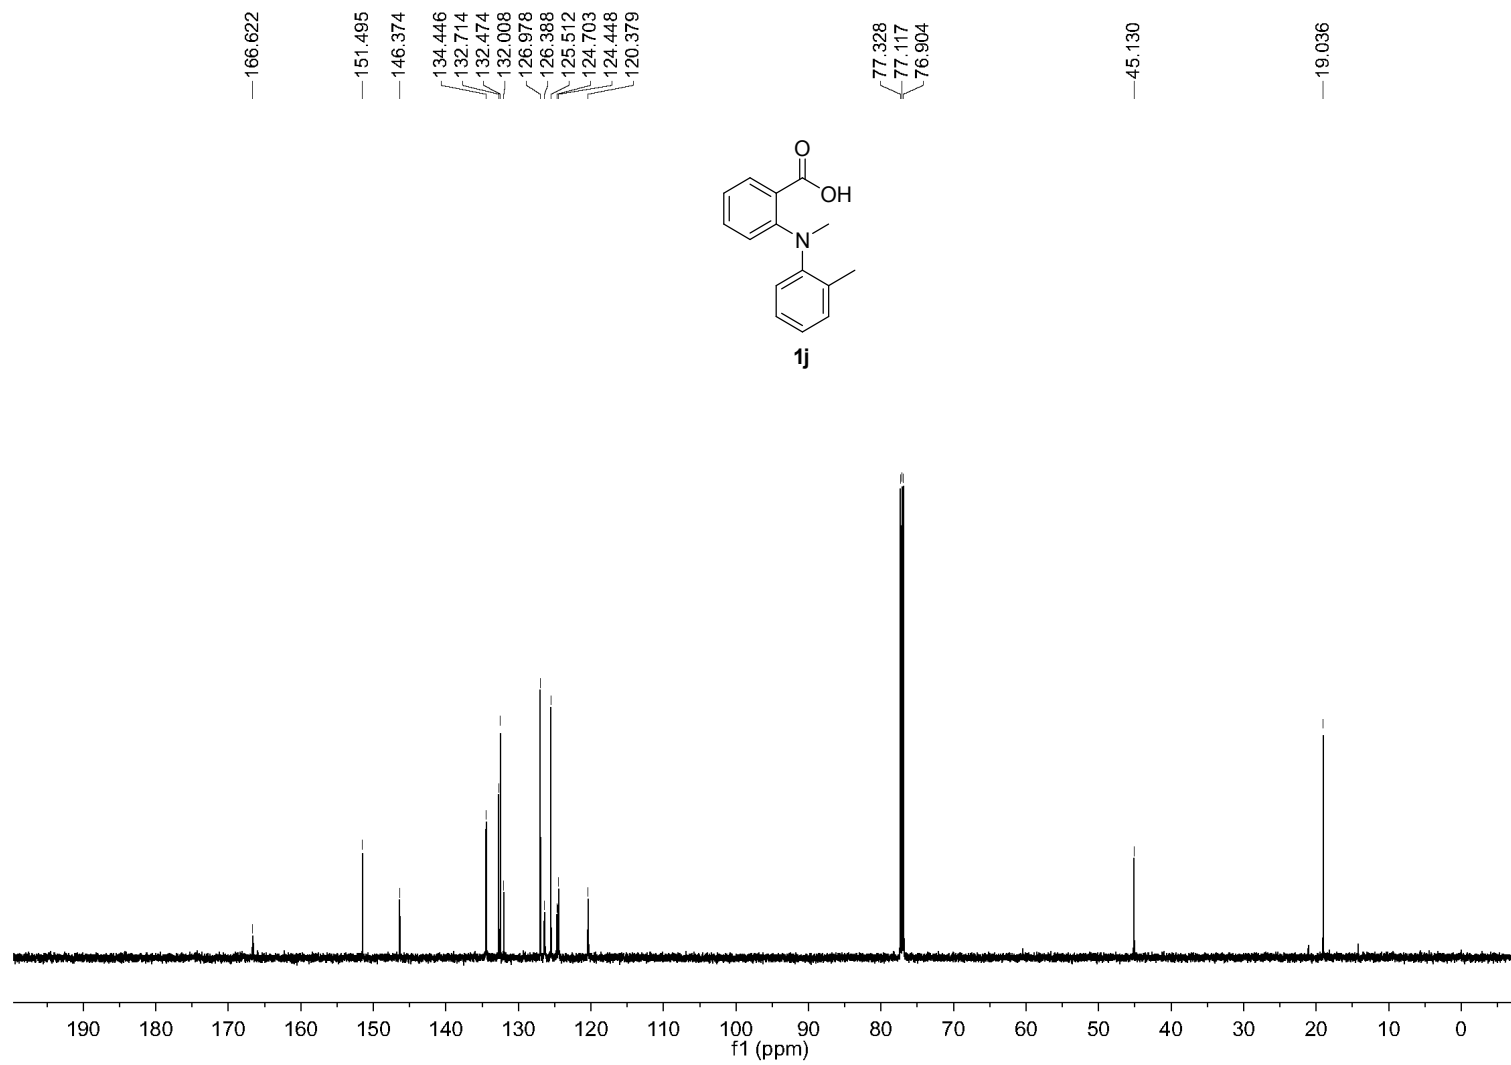

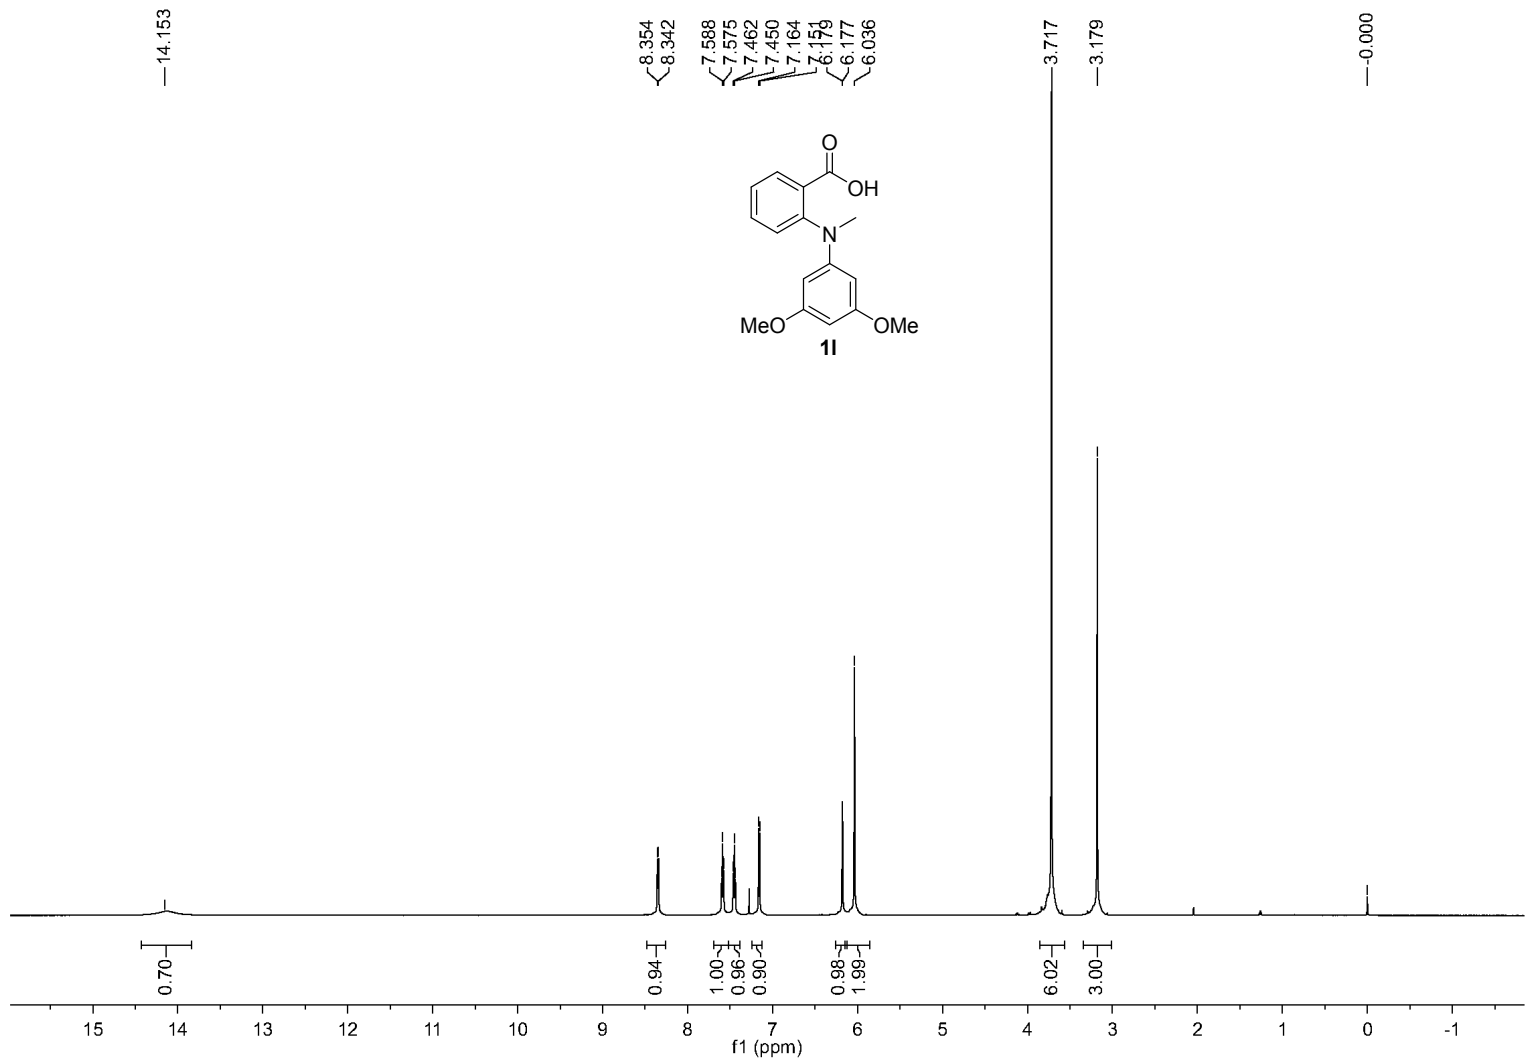

—166.135  
—161.430

150.346  
150.219

134.951  
132.447  
127.975  
127.113  
126.002

99.997  
97.844  
94.403

77.304  
77.082  
76.880

—55.390

—42.061

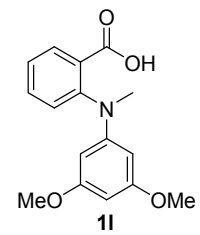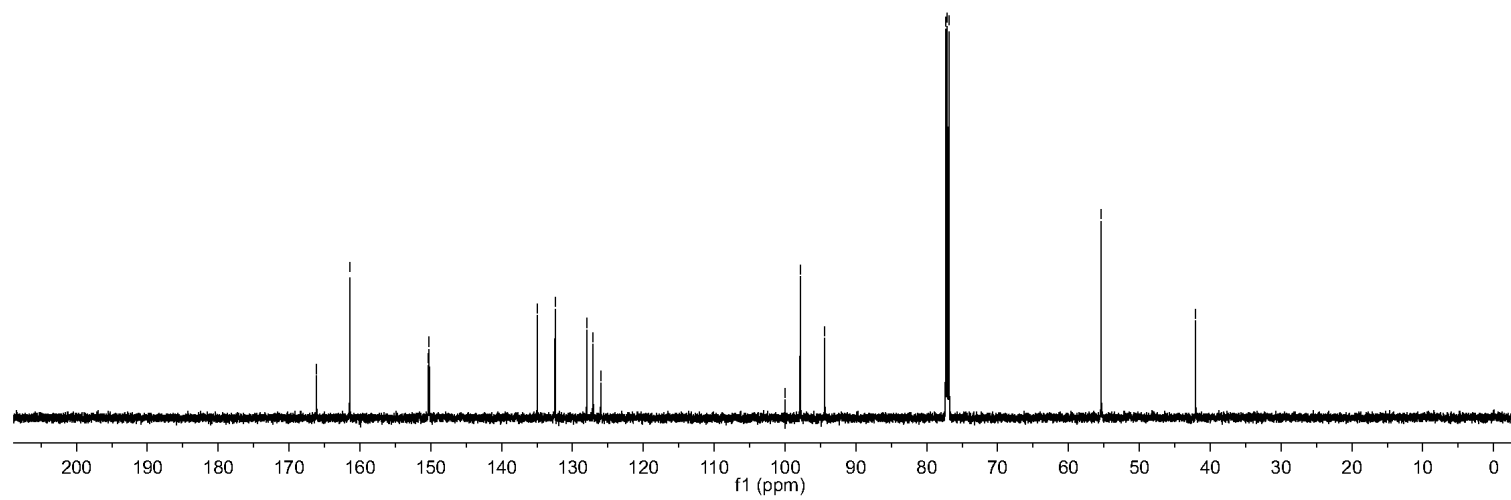

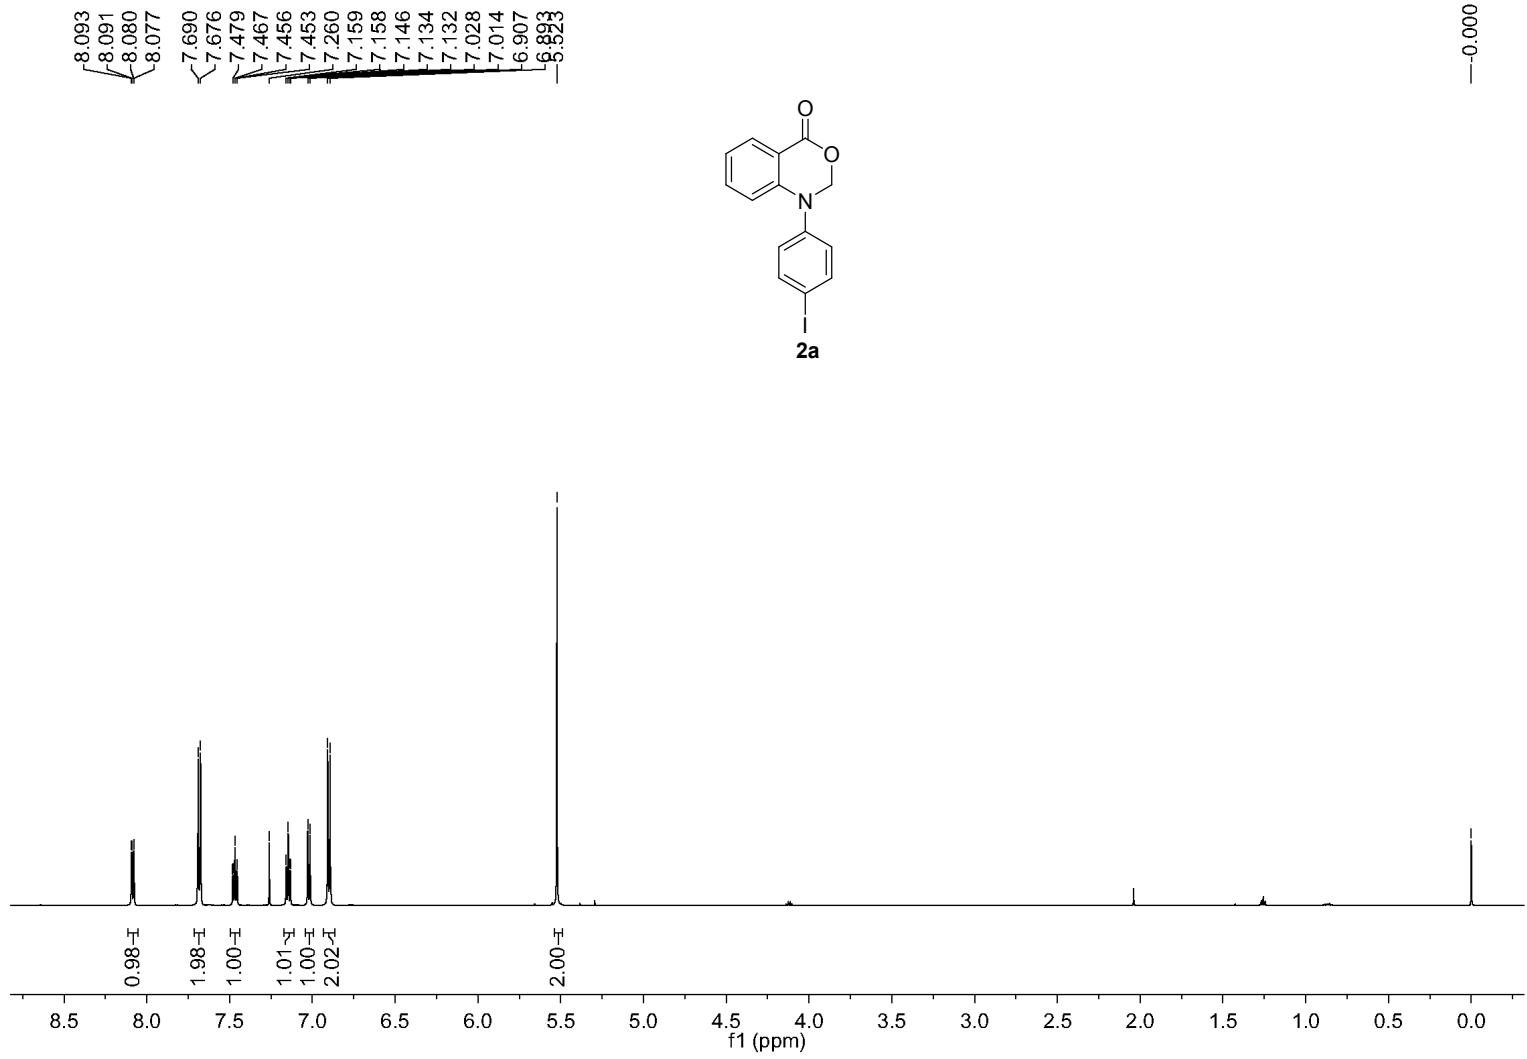

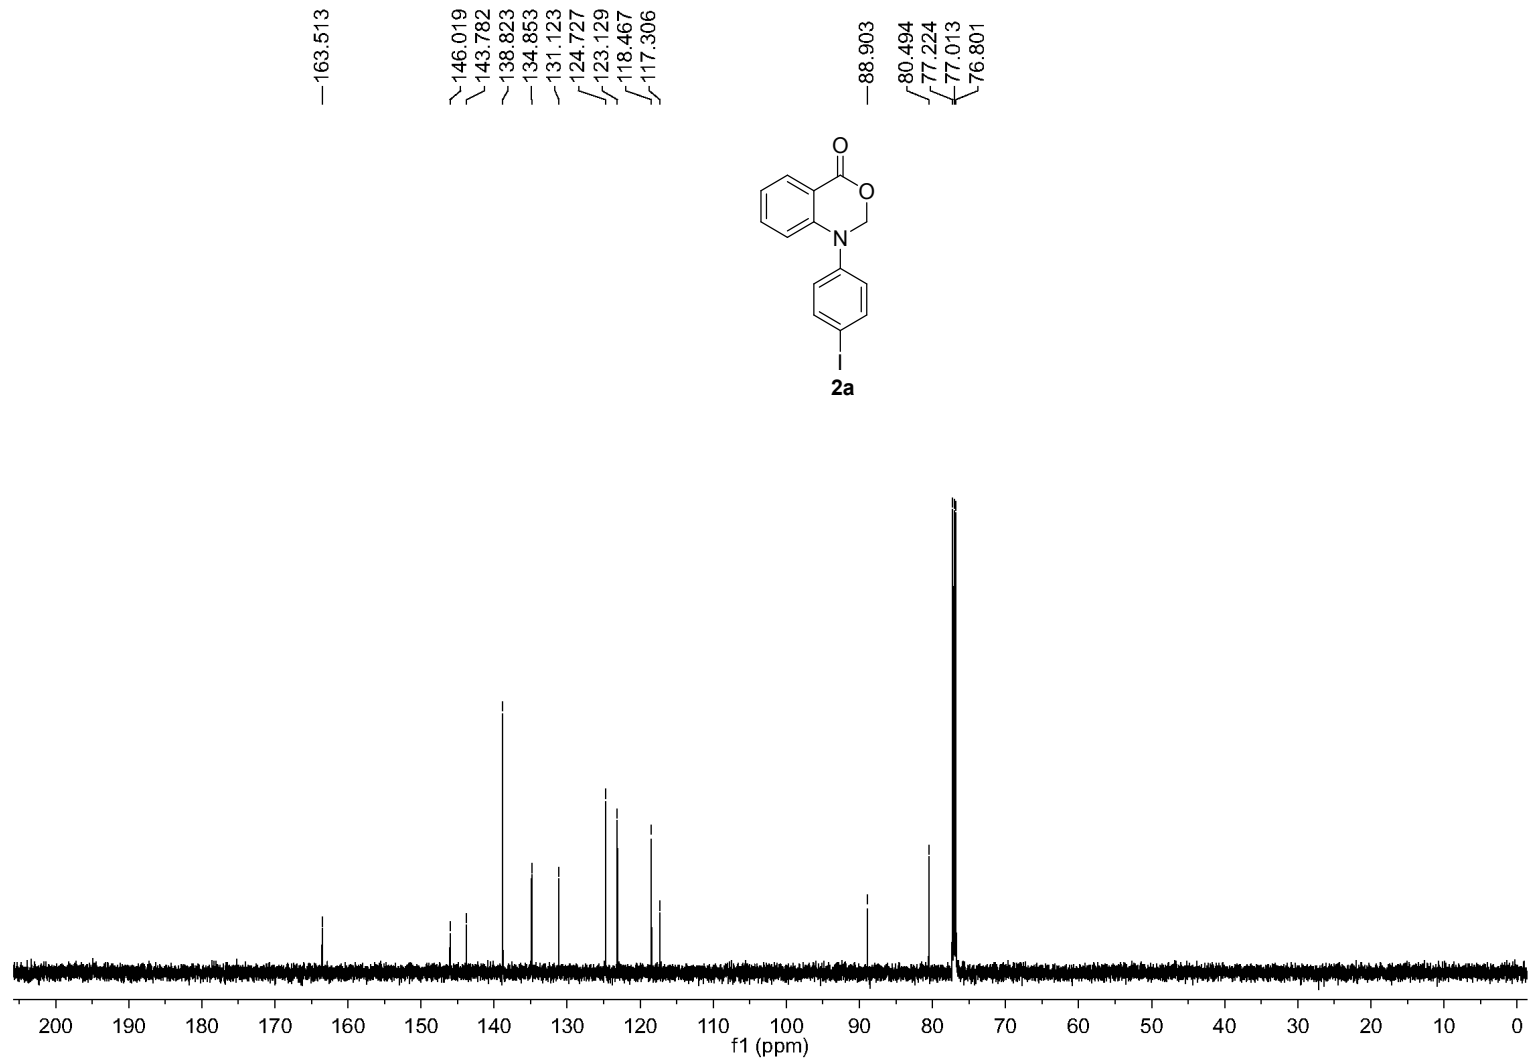

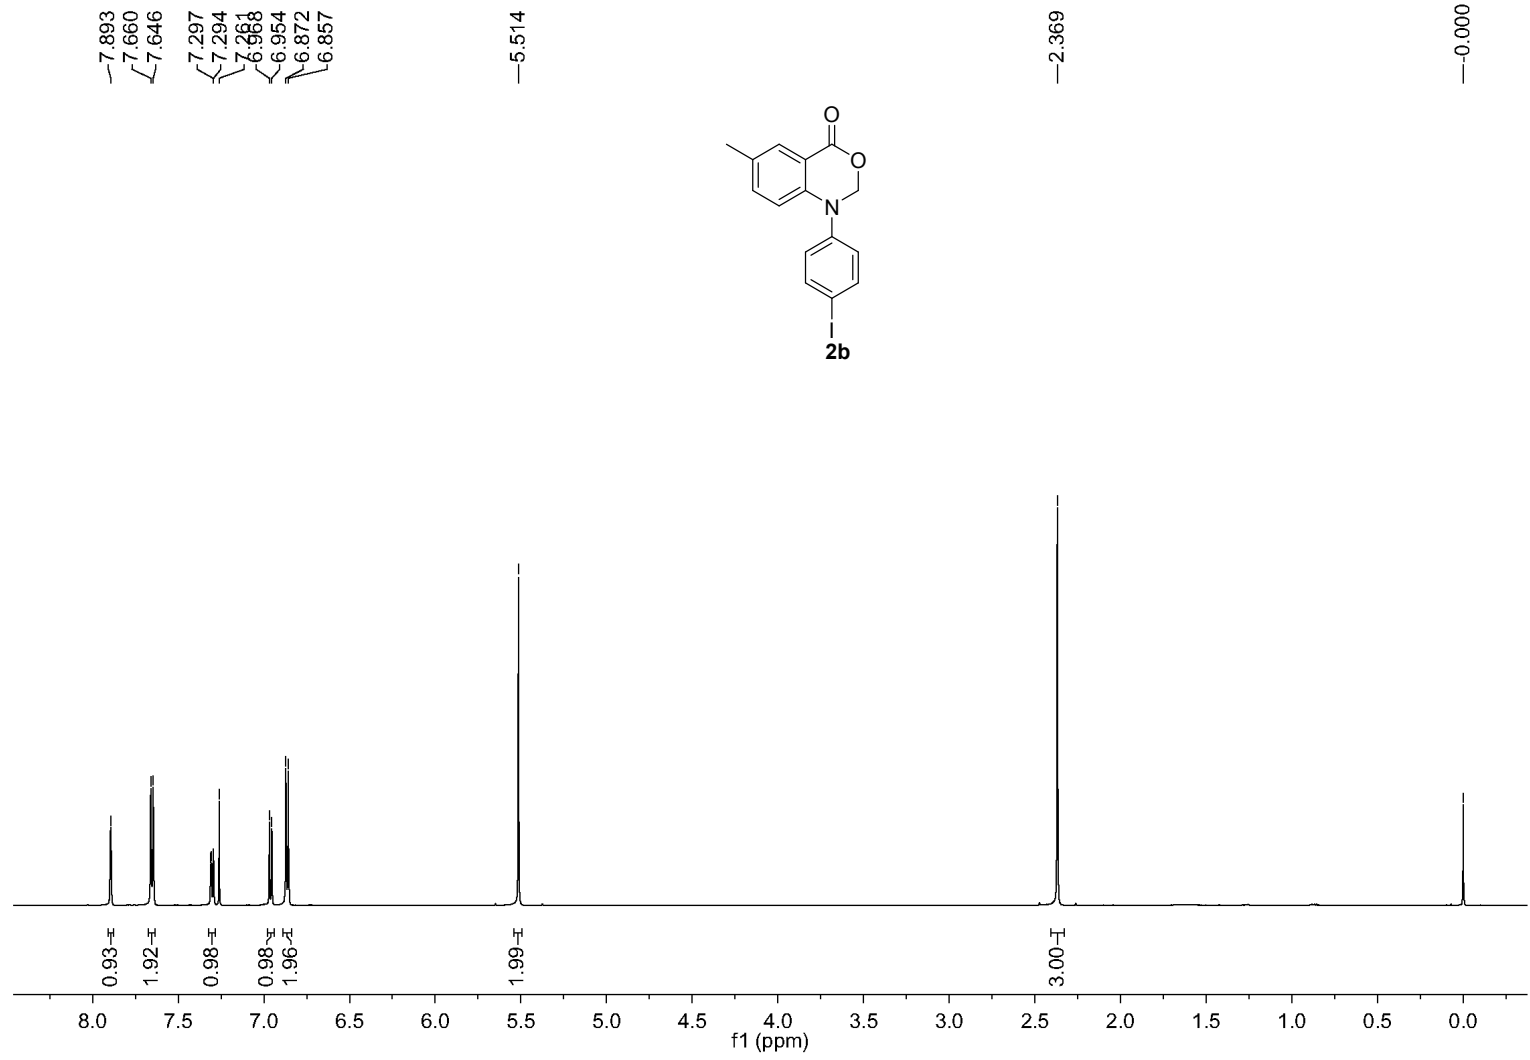



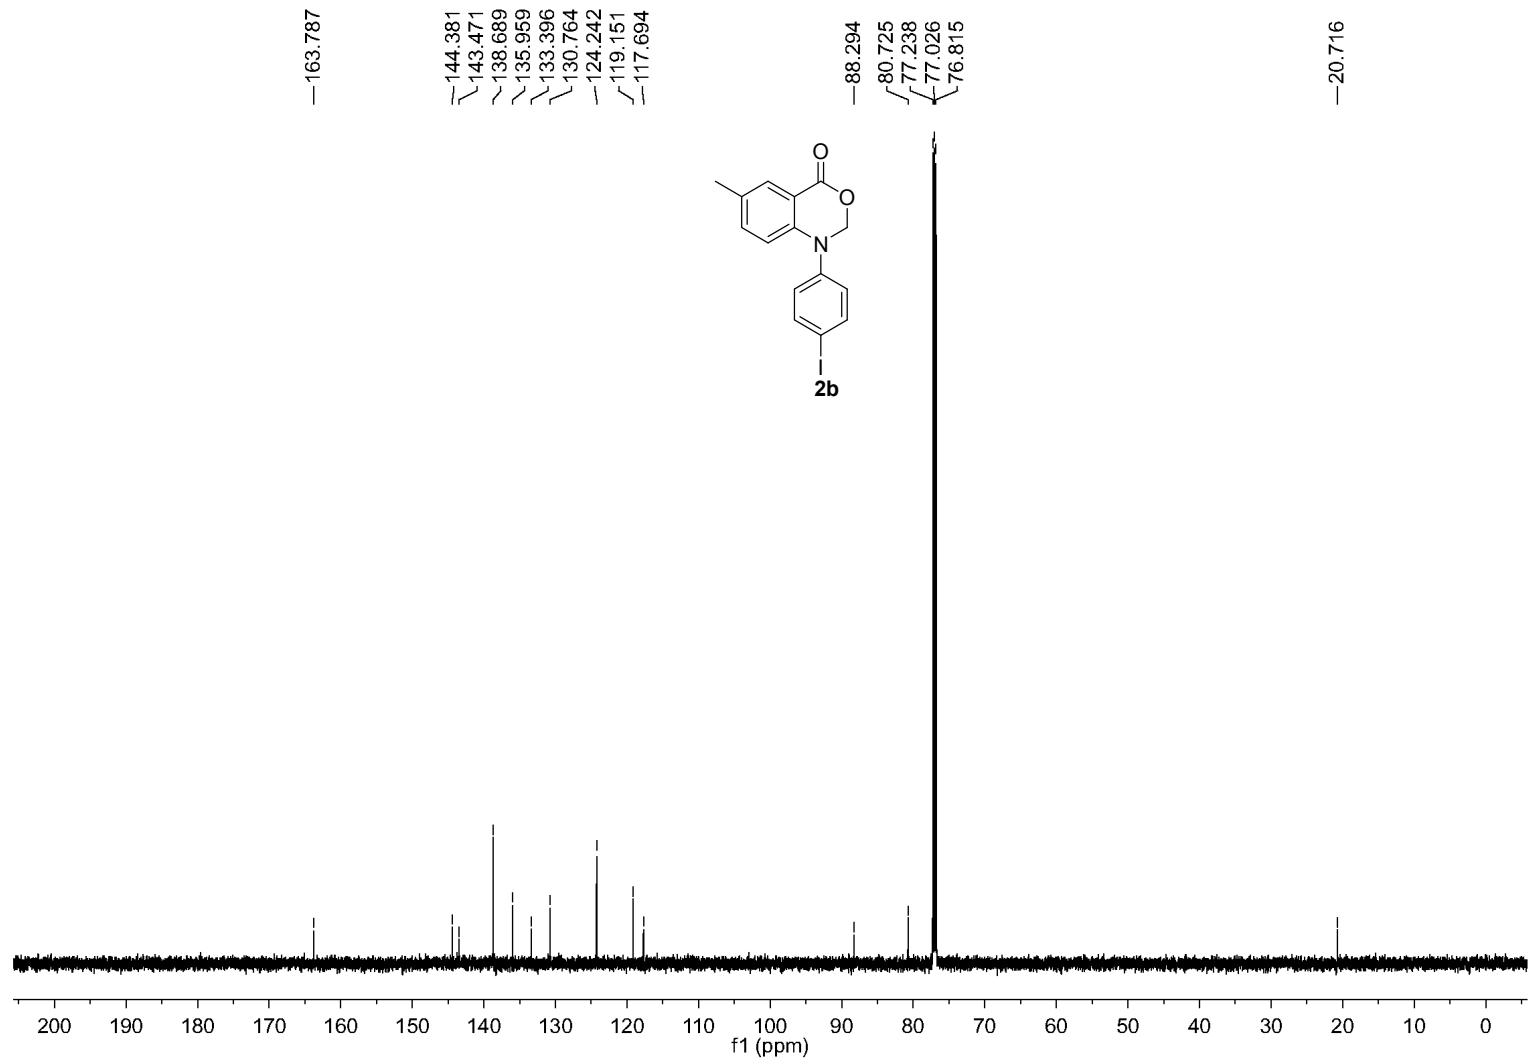

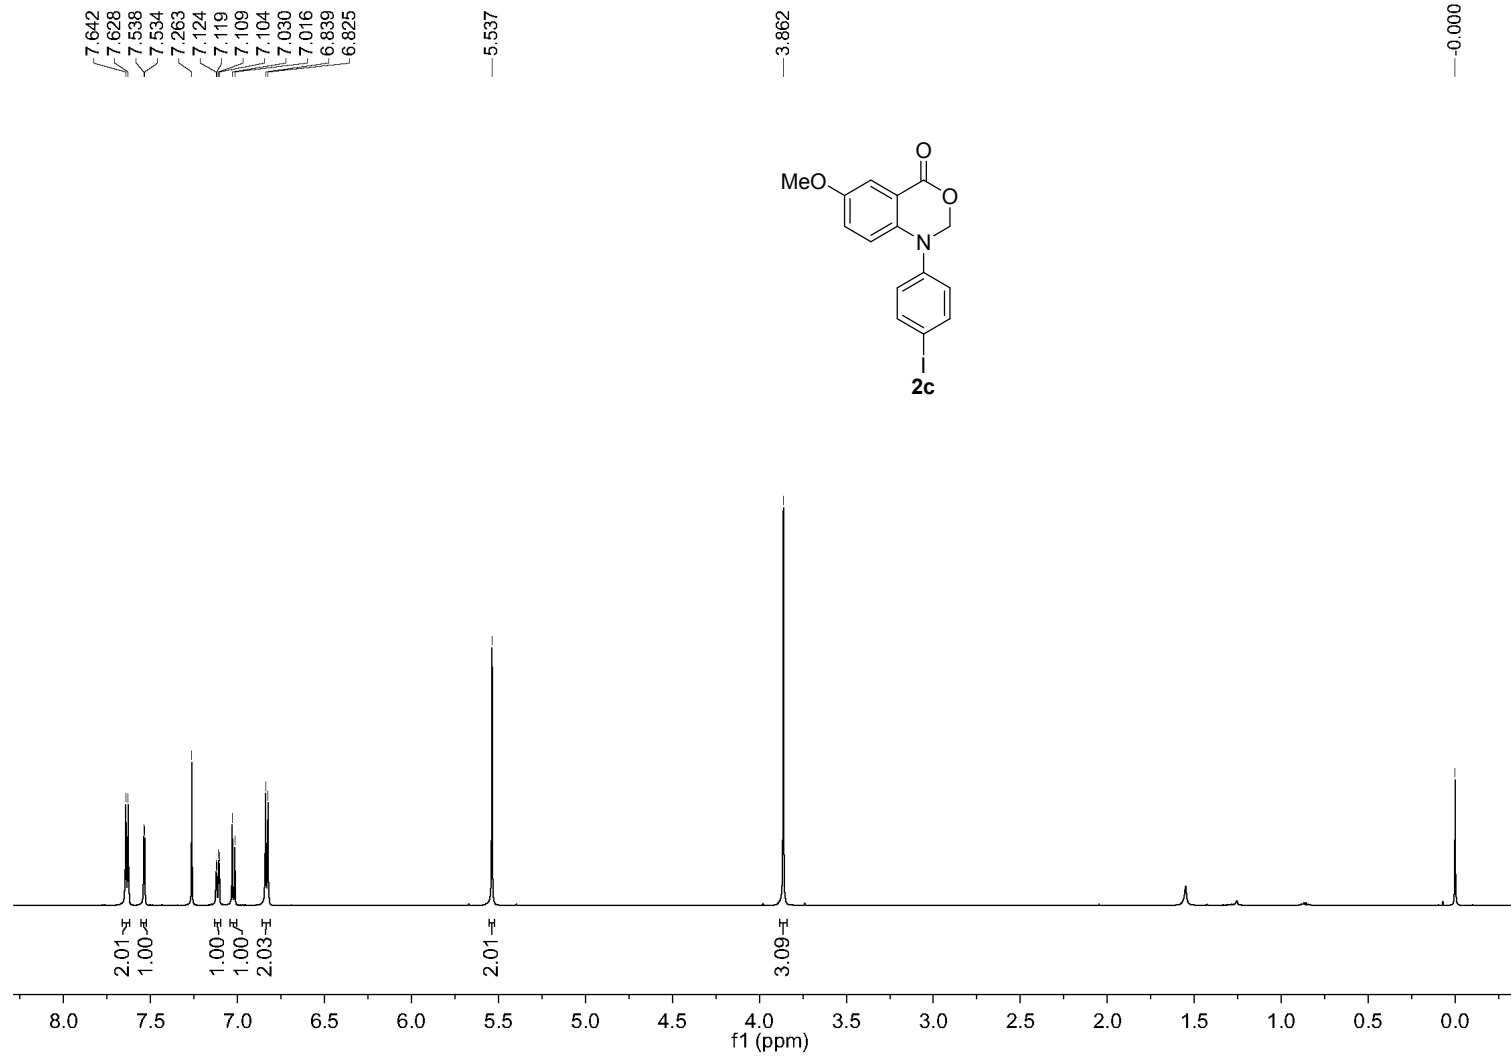

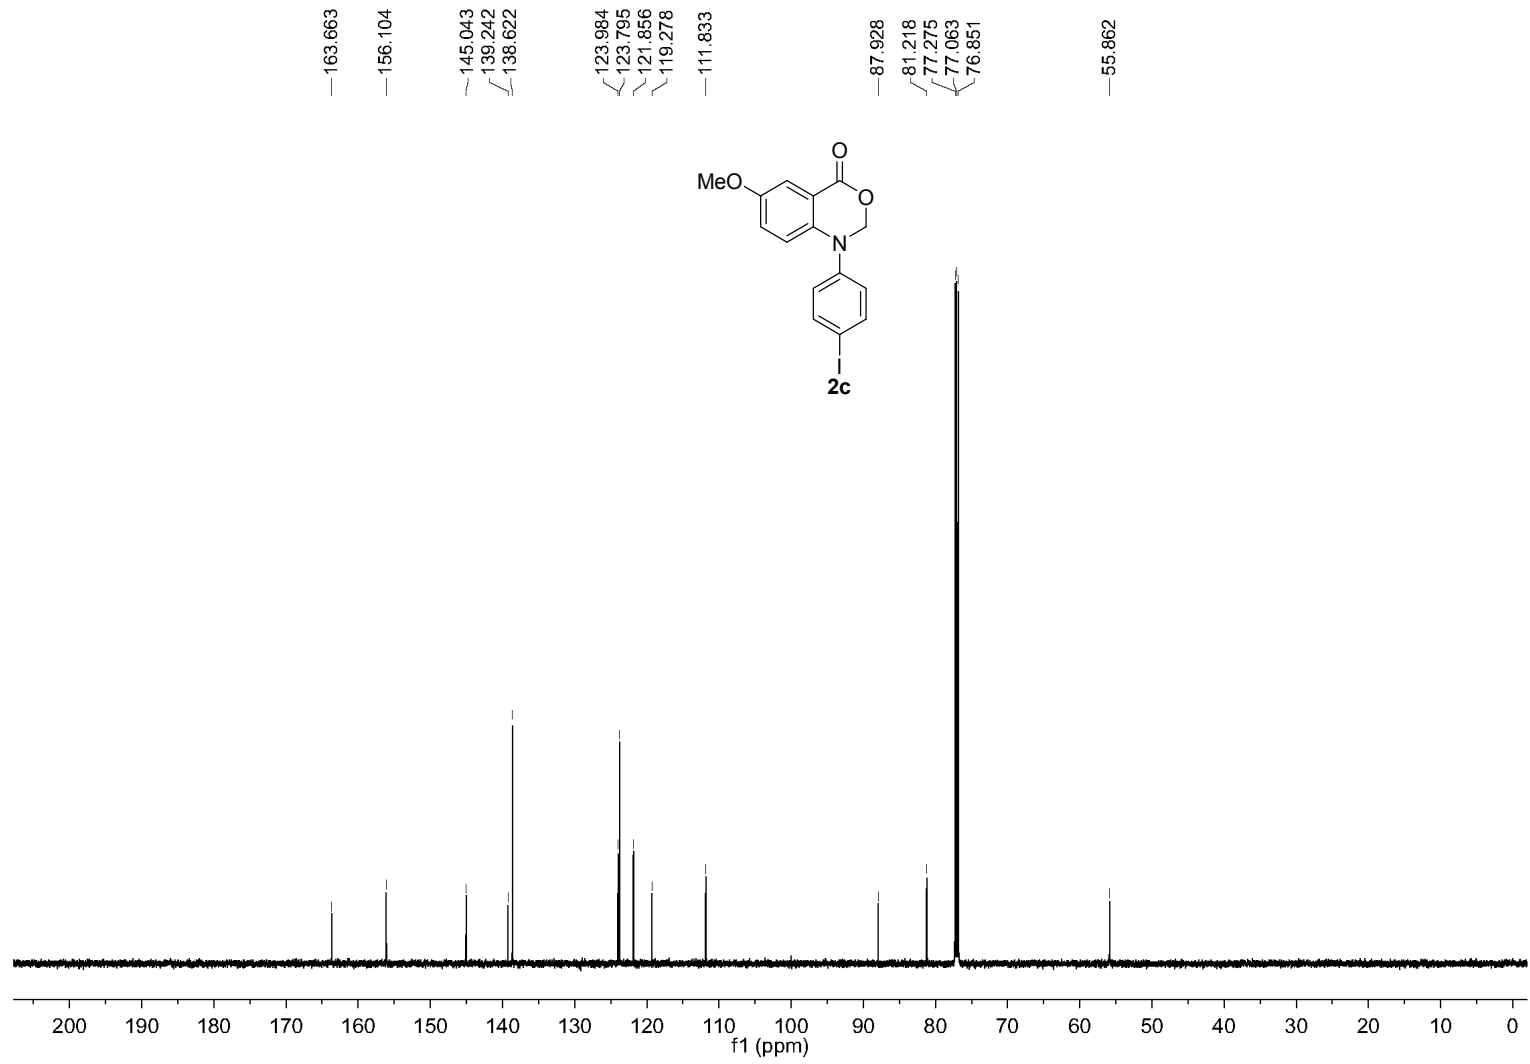

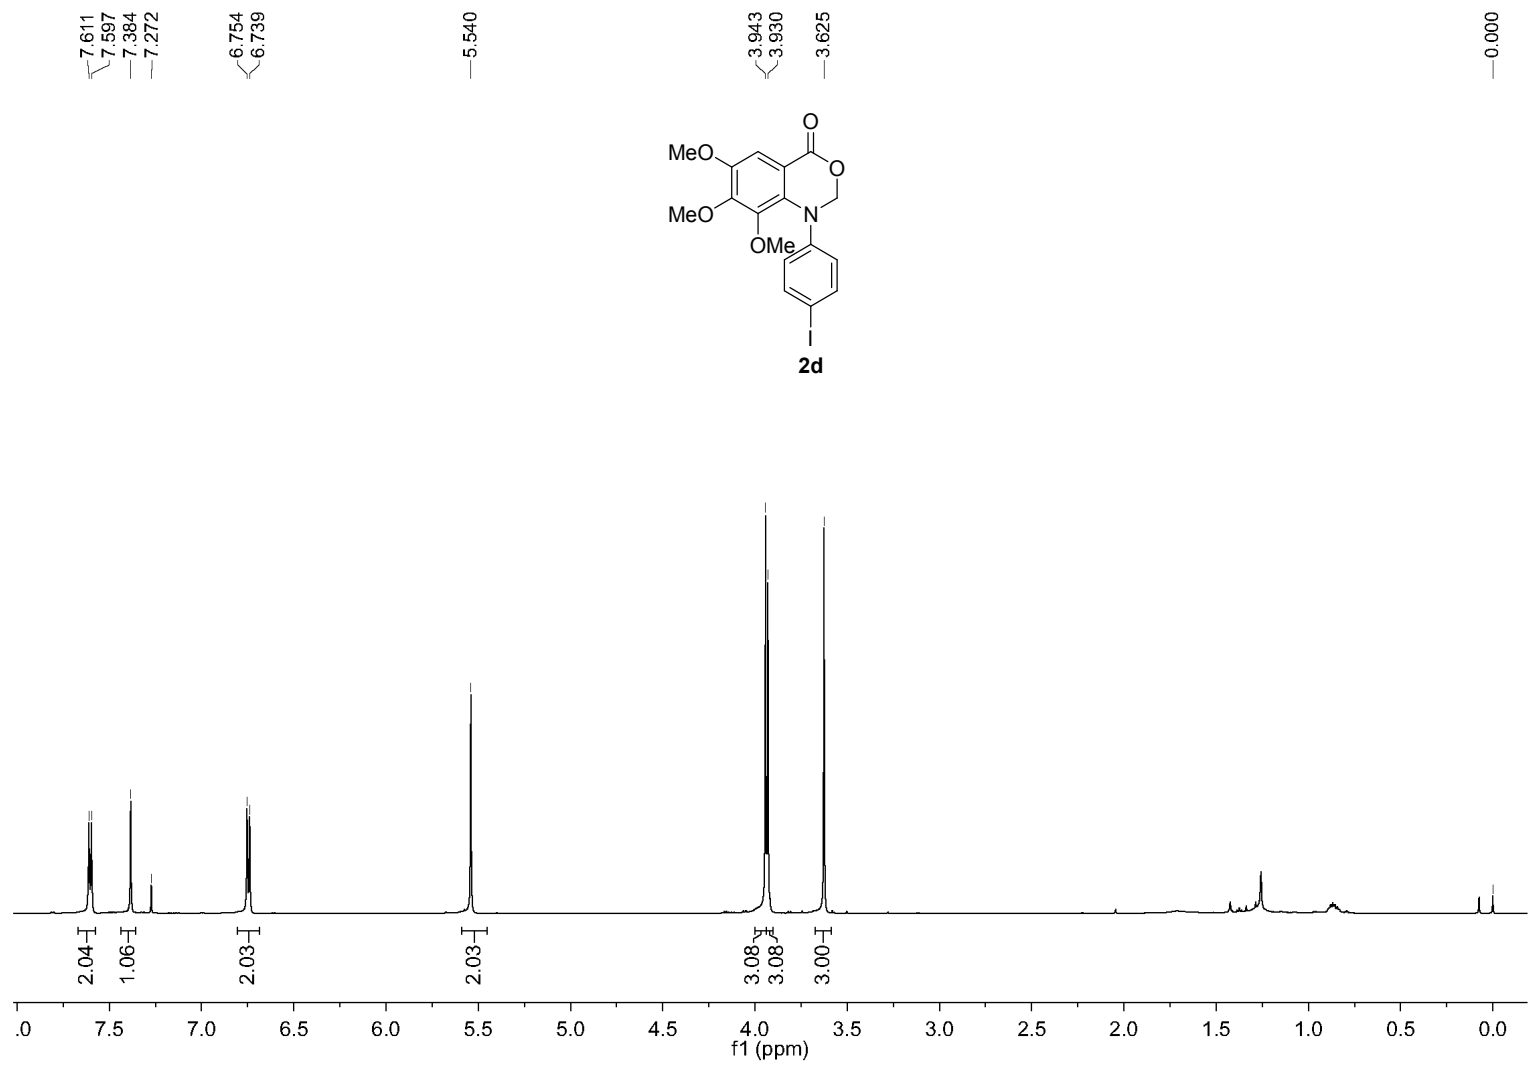

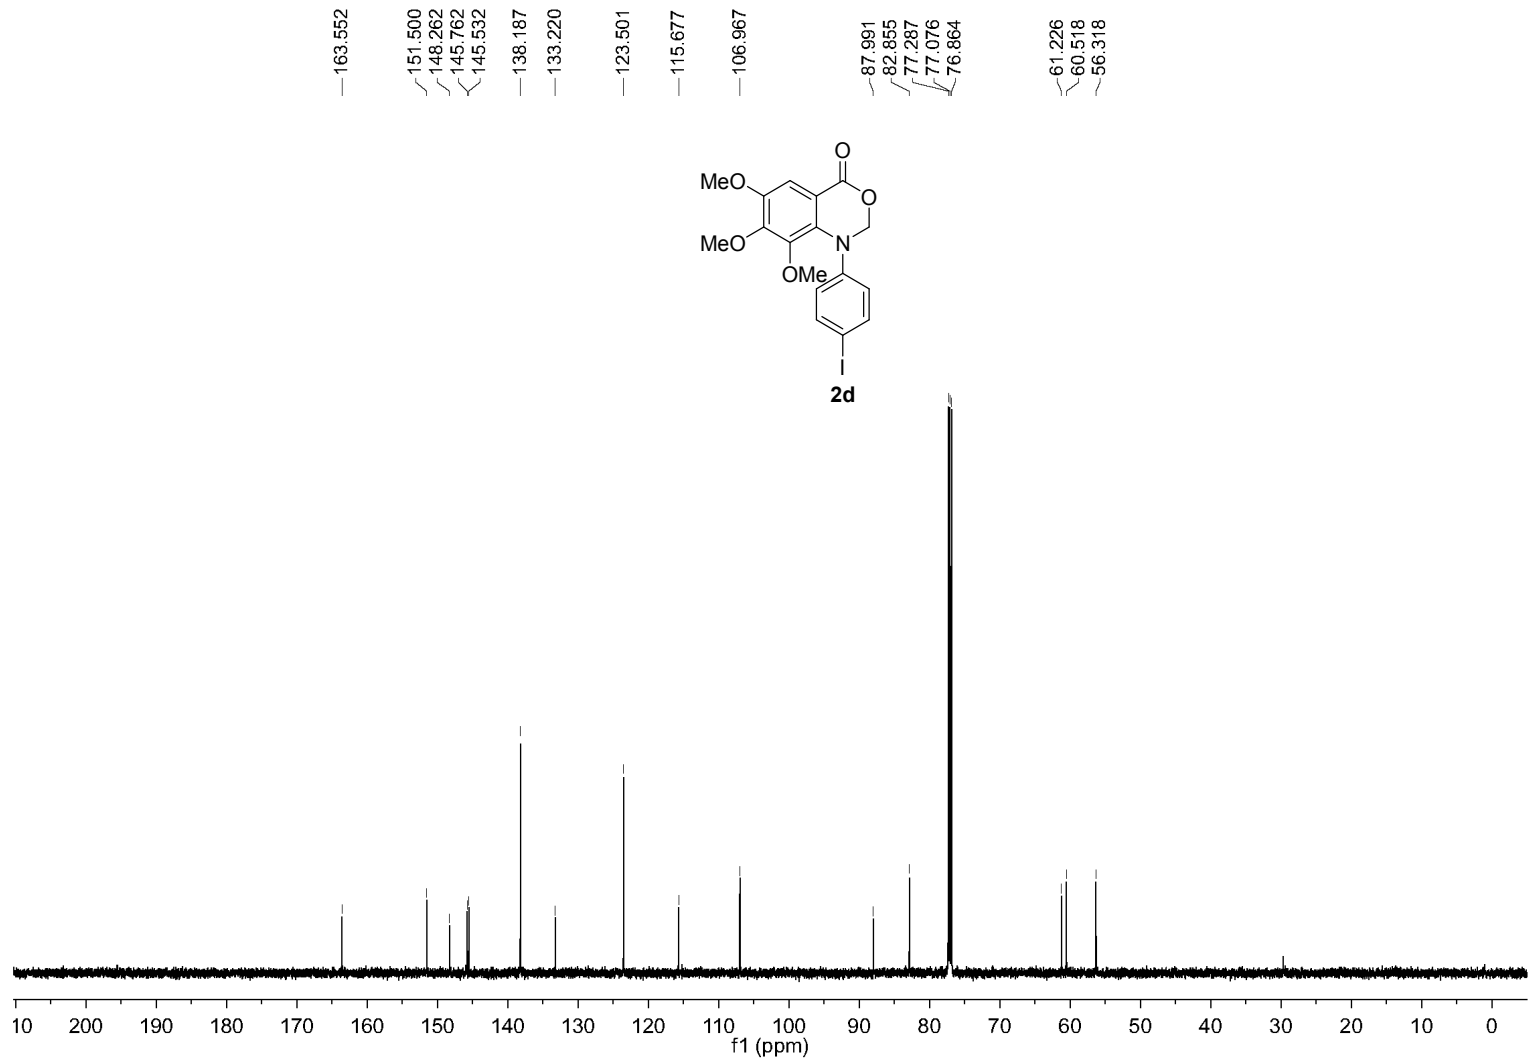

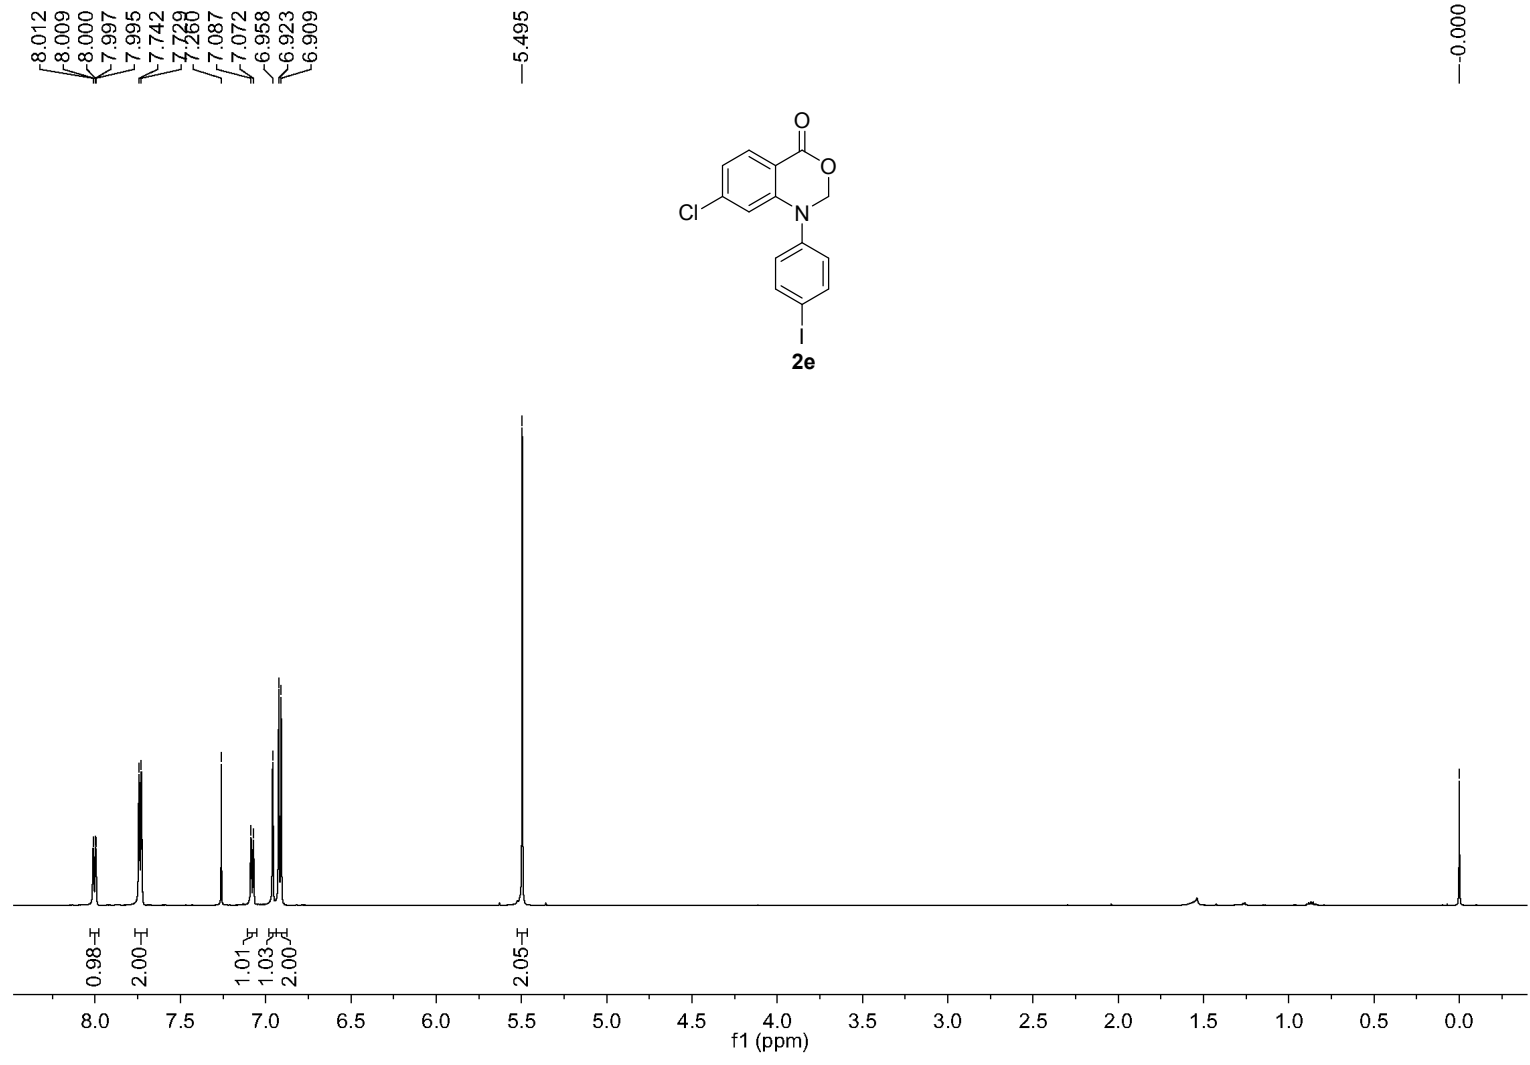

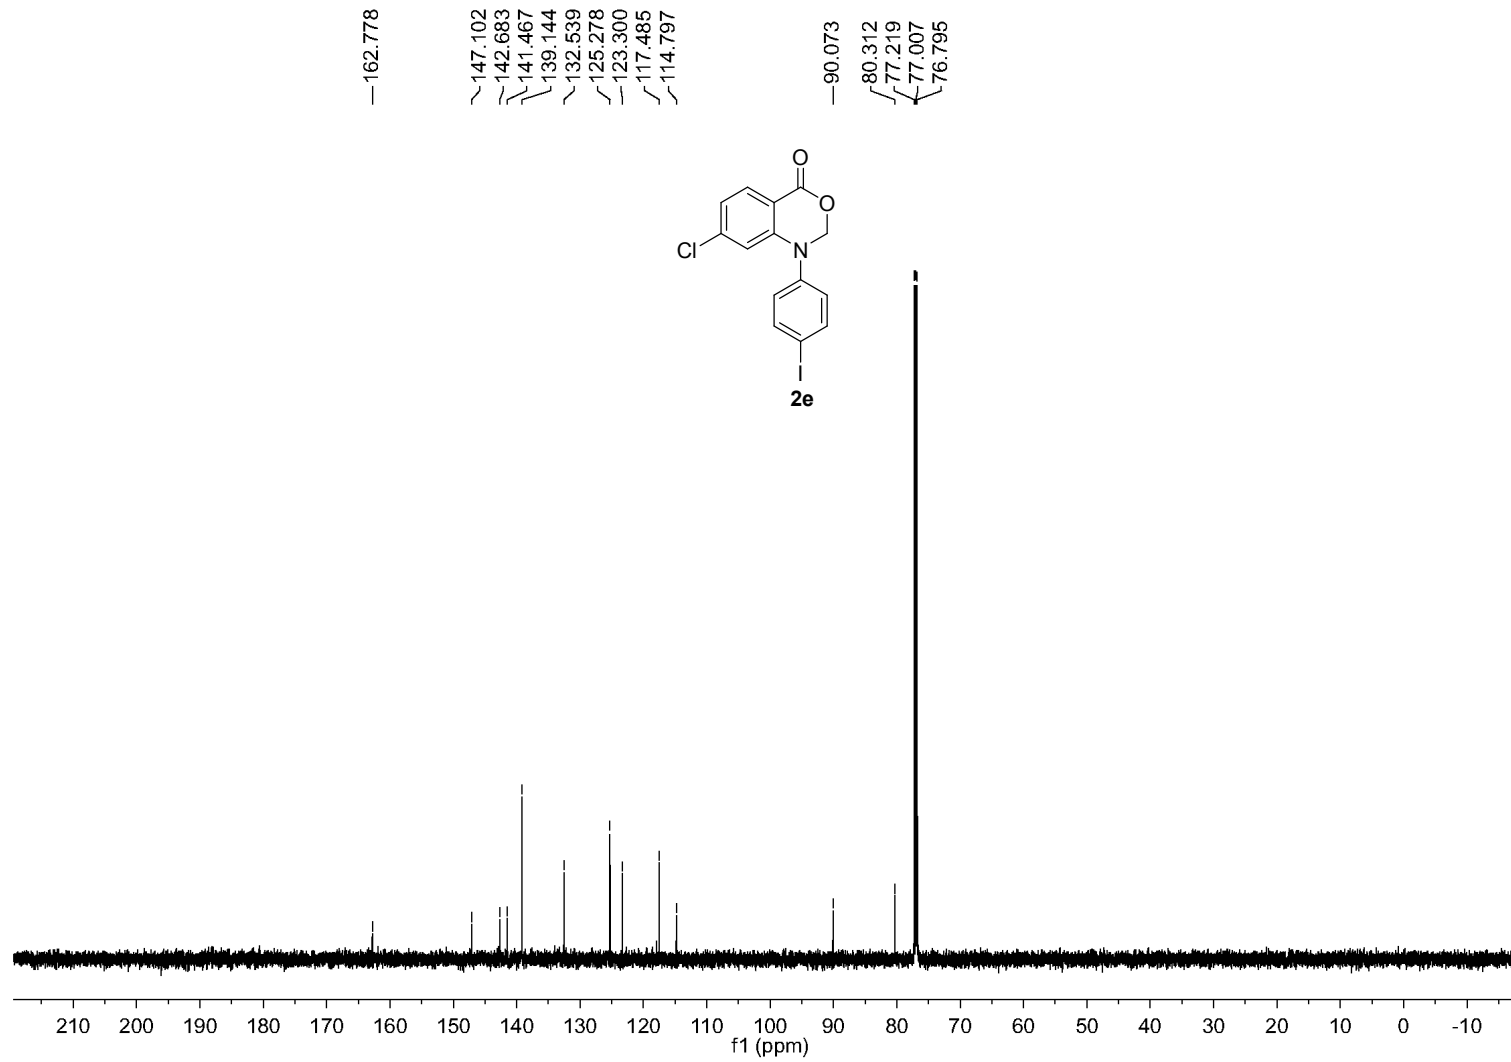

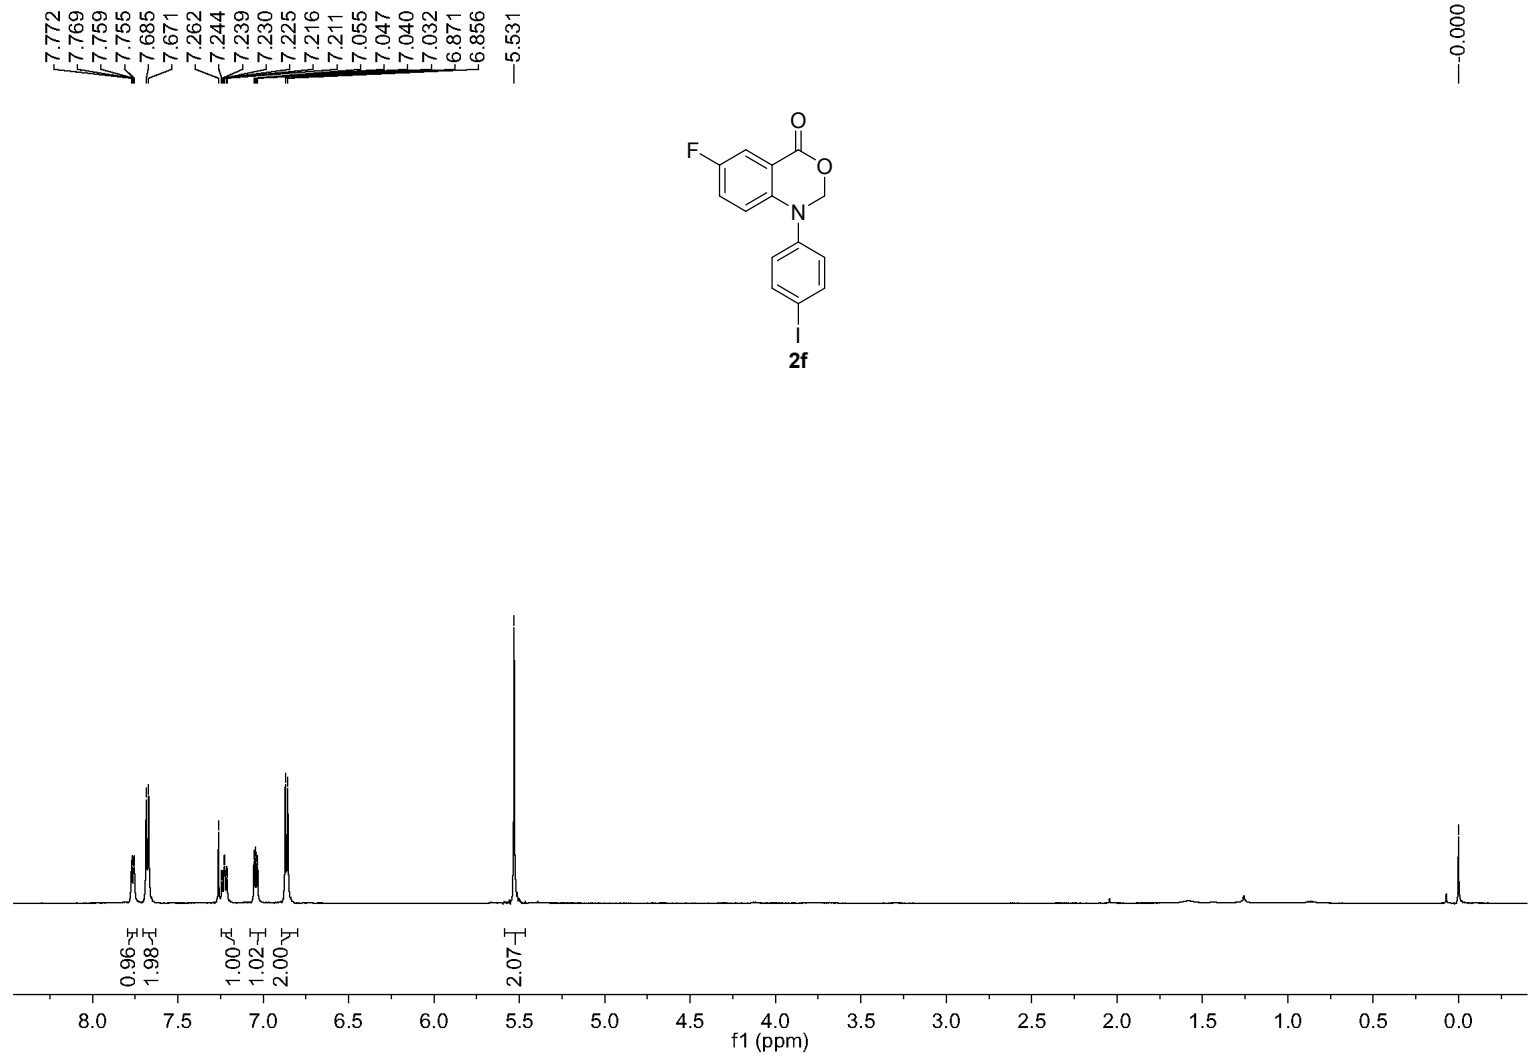



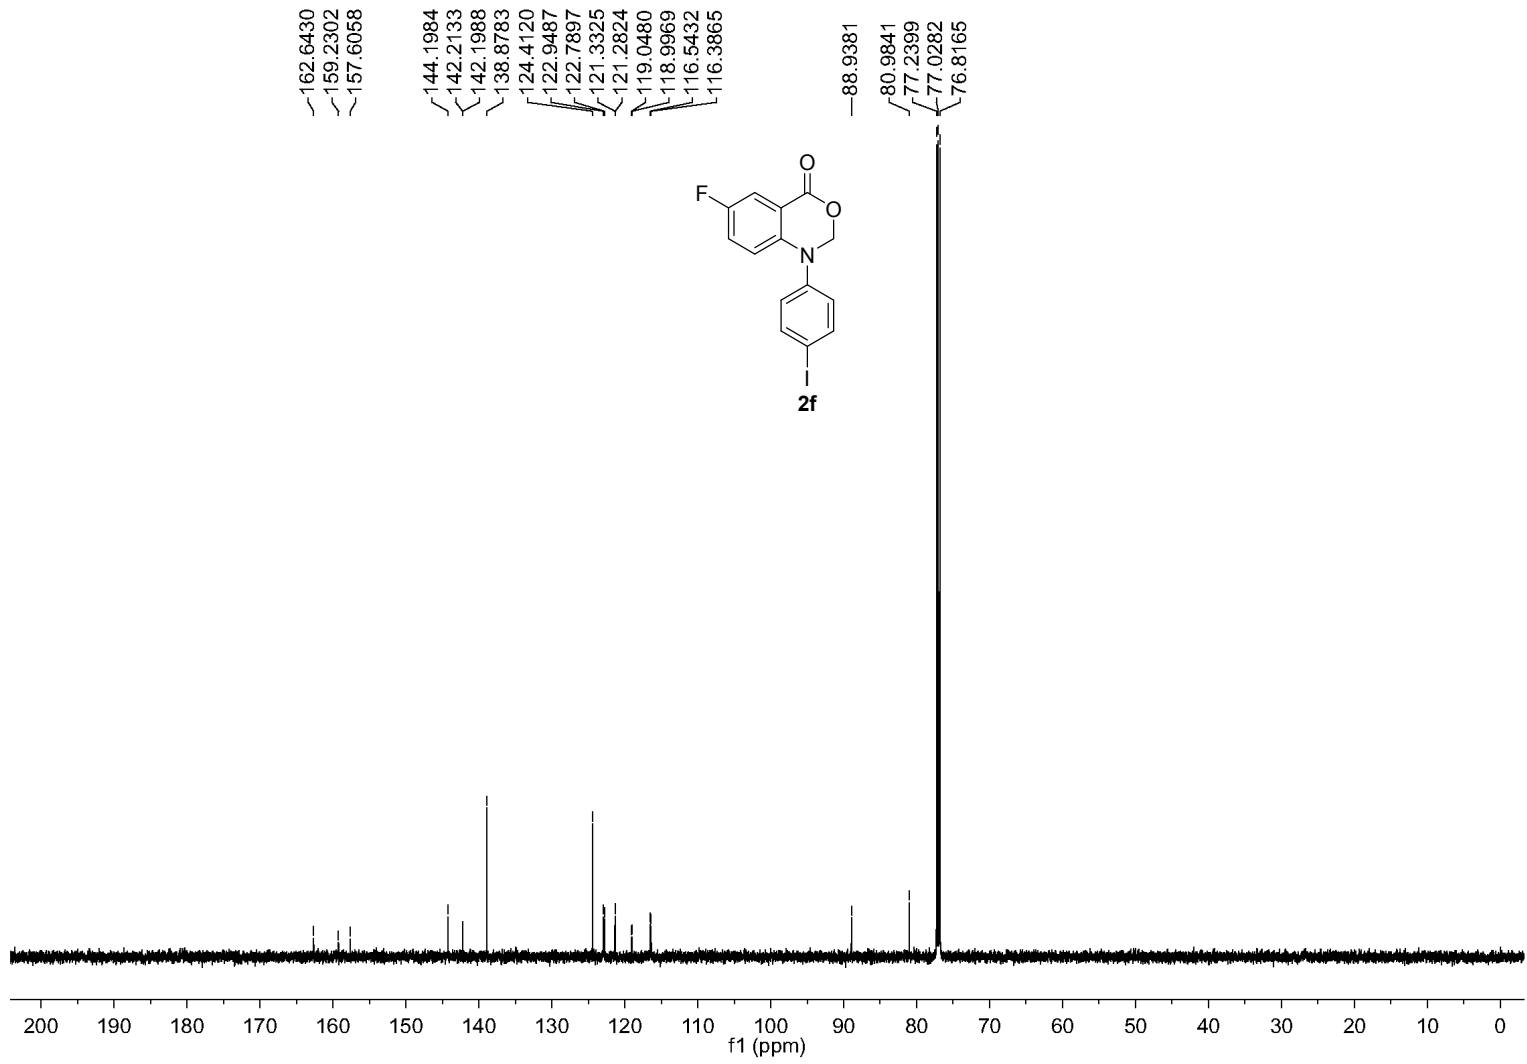

7.929  
7.927  
7.916  
7.914  
7.666  
7.652  
7.475  
7.472  
7.461  
7.450  
7.448  
7.436  
7.424  
7.422  
7.331  
7.326  
7.322  
7.316  
7.305  
7.257  
7.092  
7.078  
7.028  
7.015  
7.003  
6.941  
6.926  
6.721

0.000

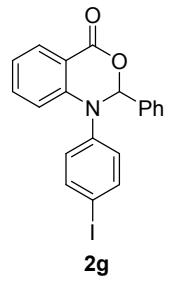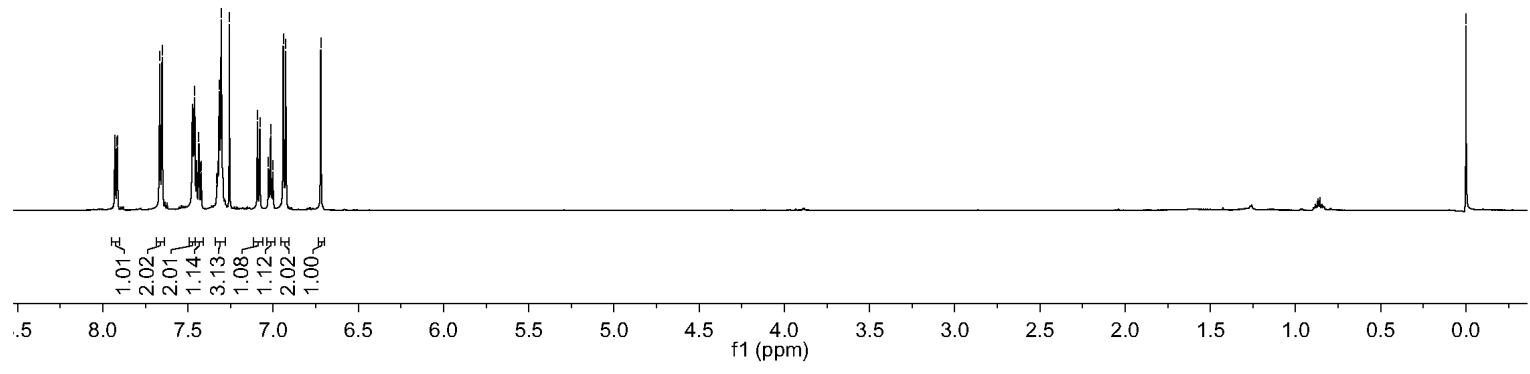

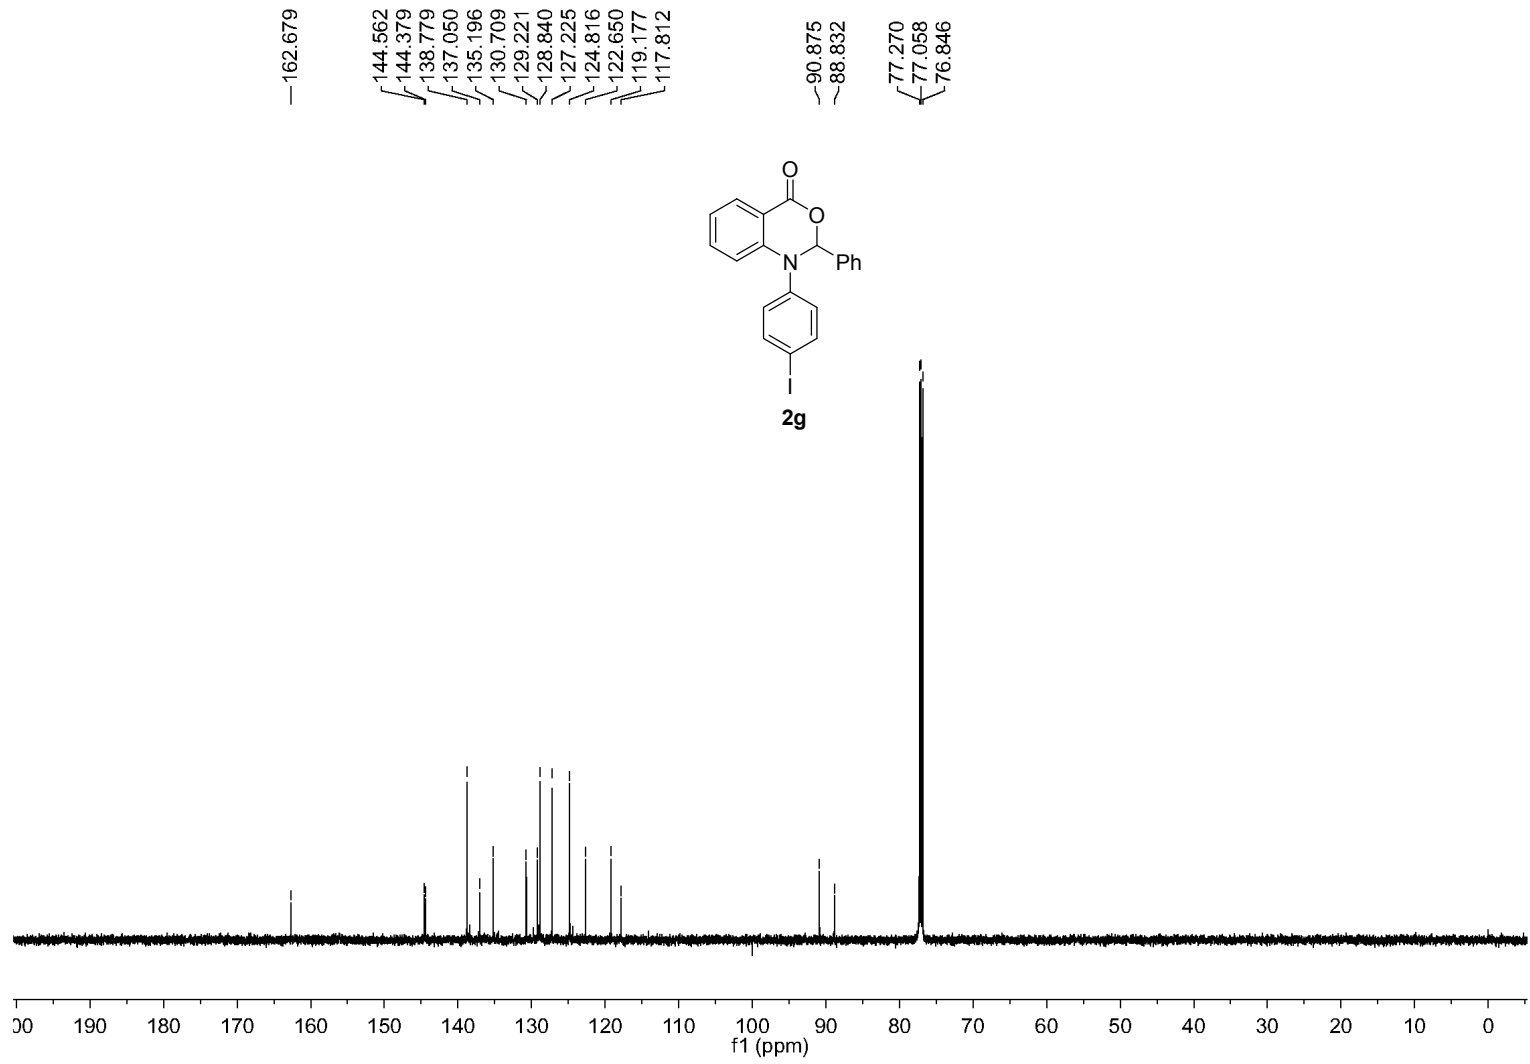

7.979  
7.966  
7.651  
7.637  
7.326  
7.312  
6.988  
6.975  
6.963  
6.933  
6.850  
6.836  
6.650  
6.635  
5.692  
5.682  
5.672

1.499  
1.489

0.000

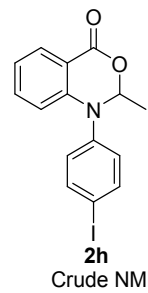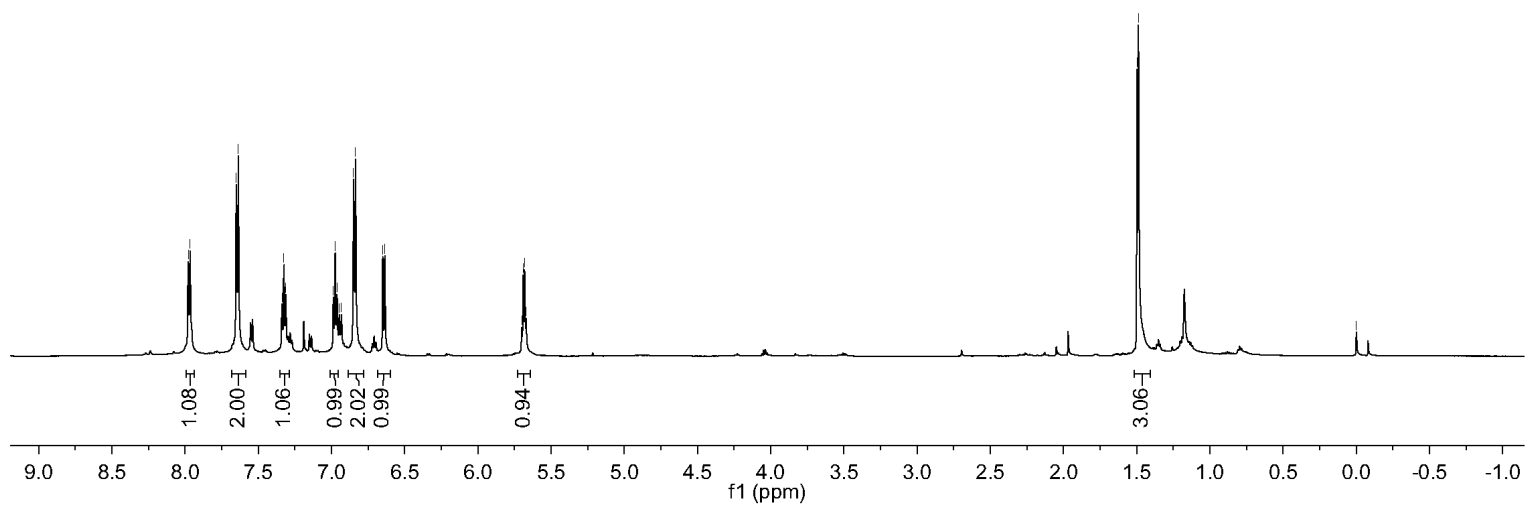

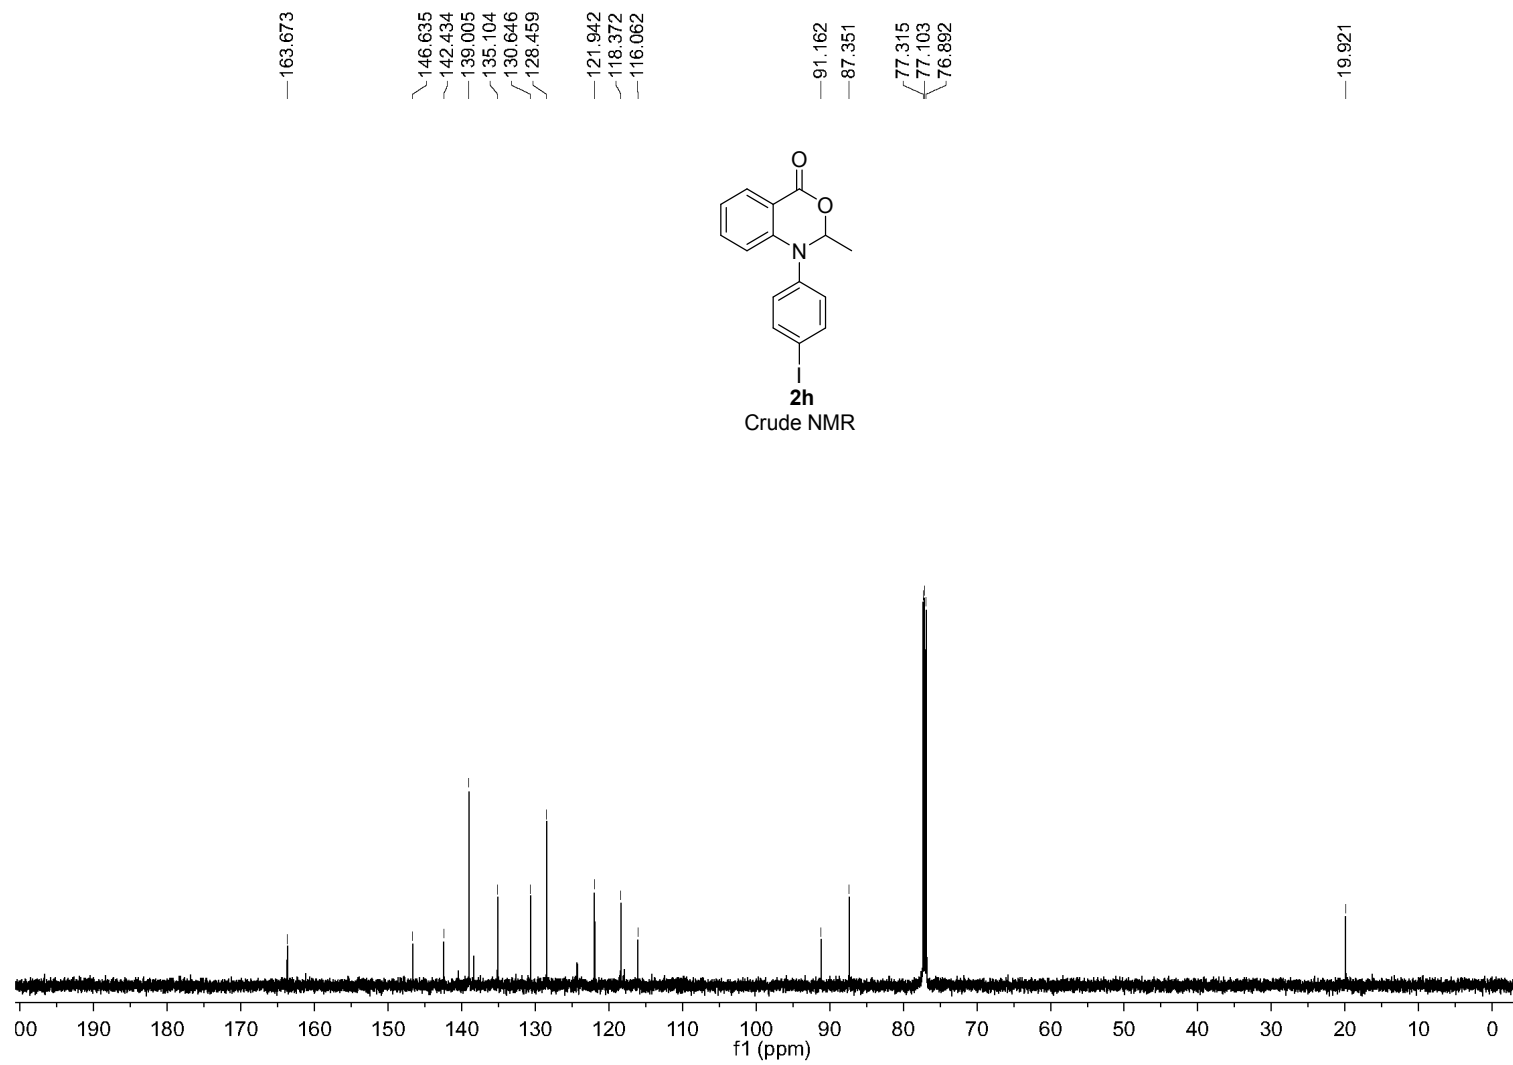

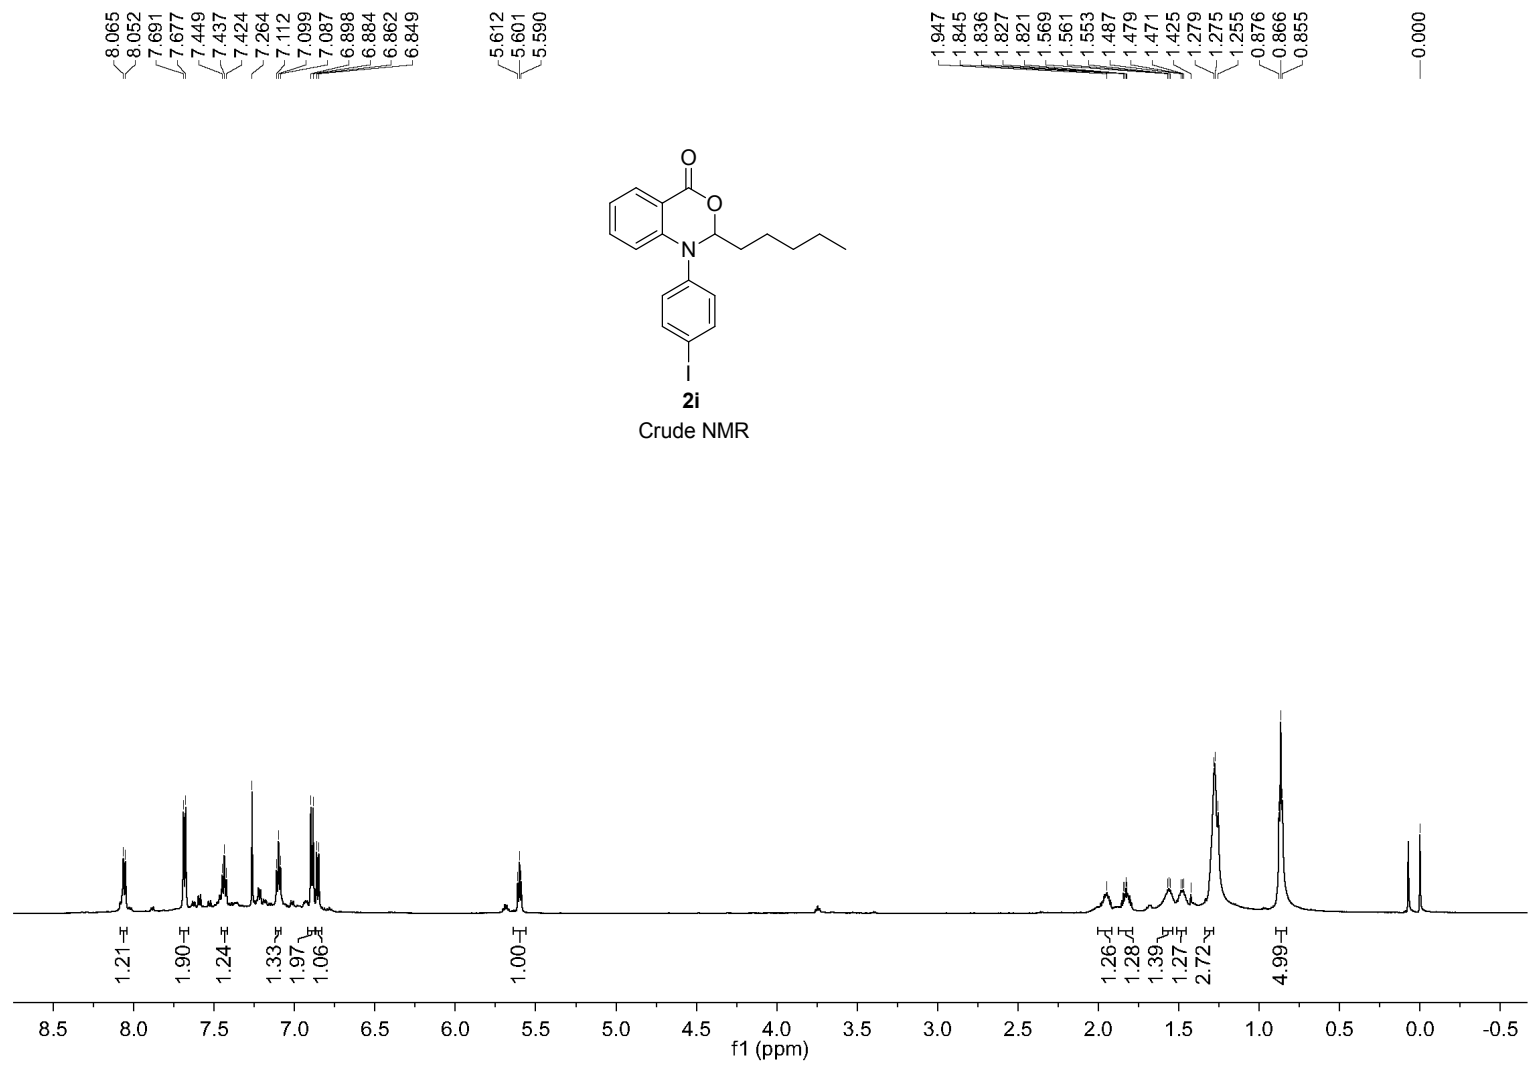

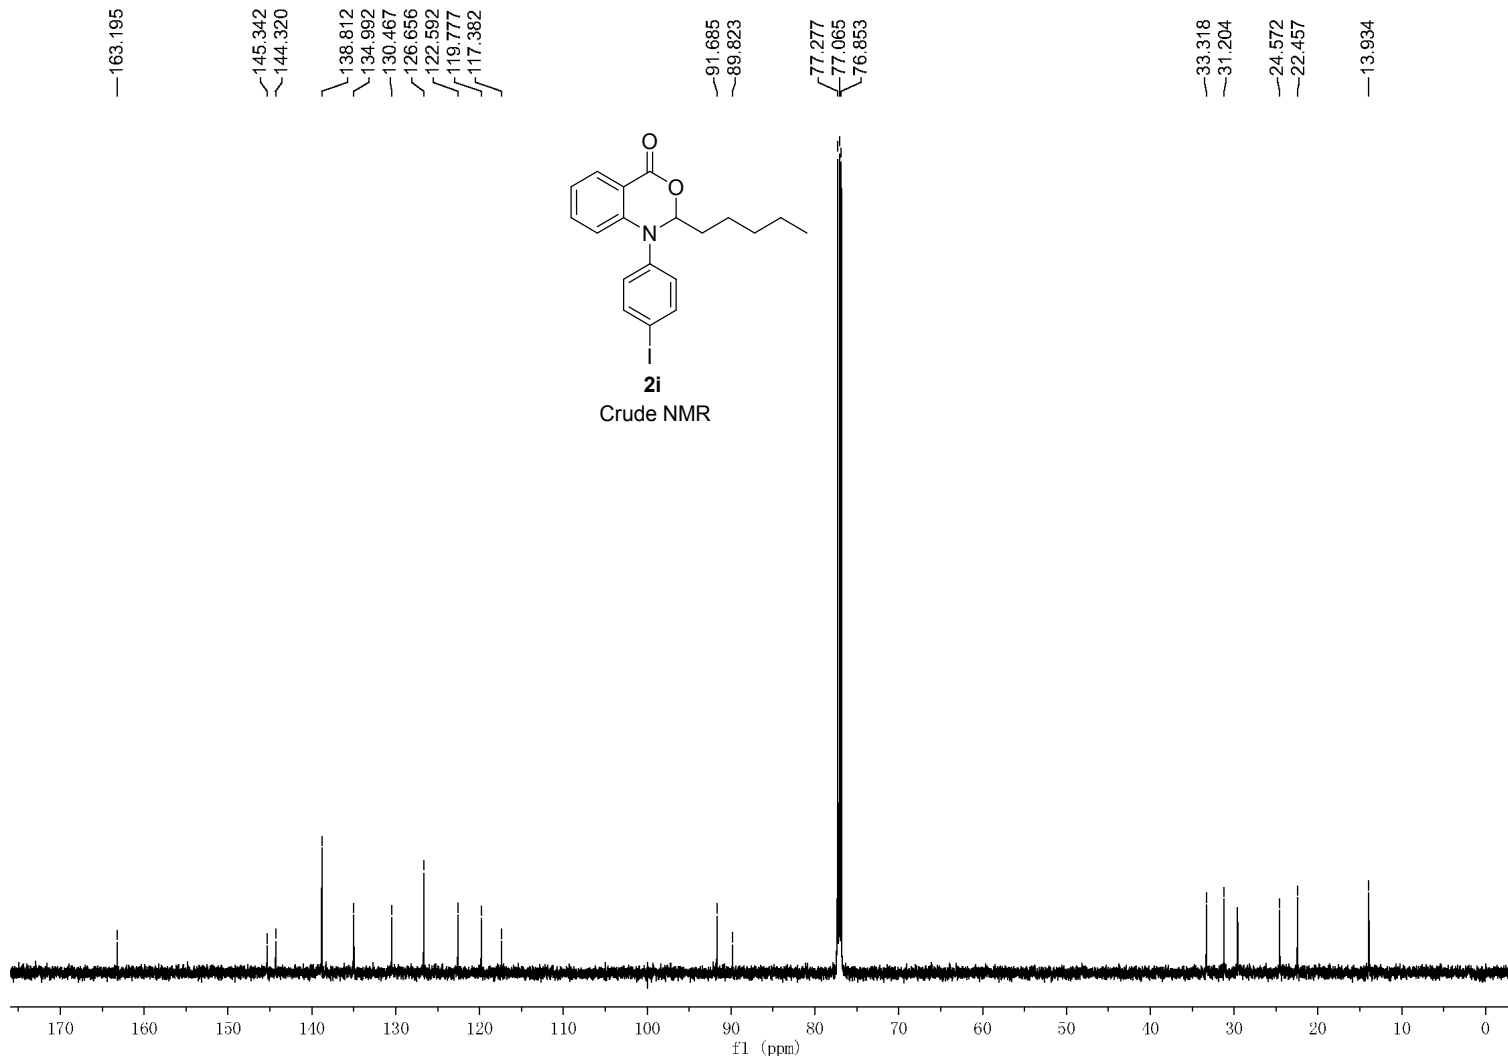

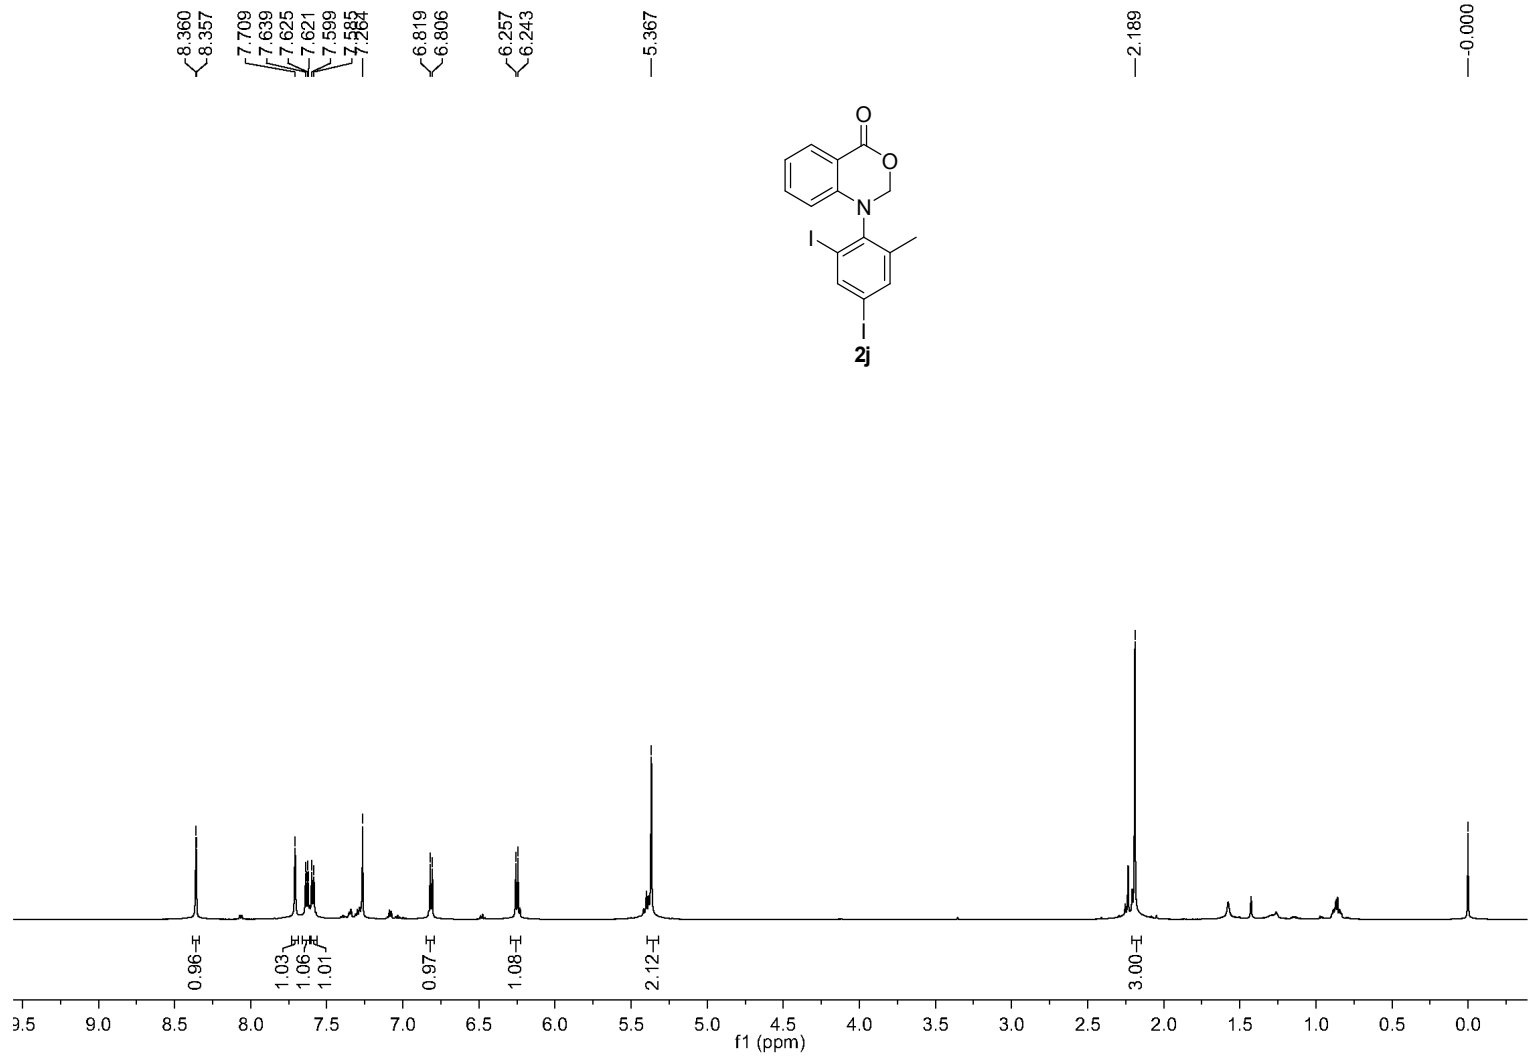



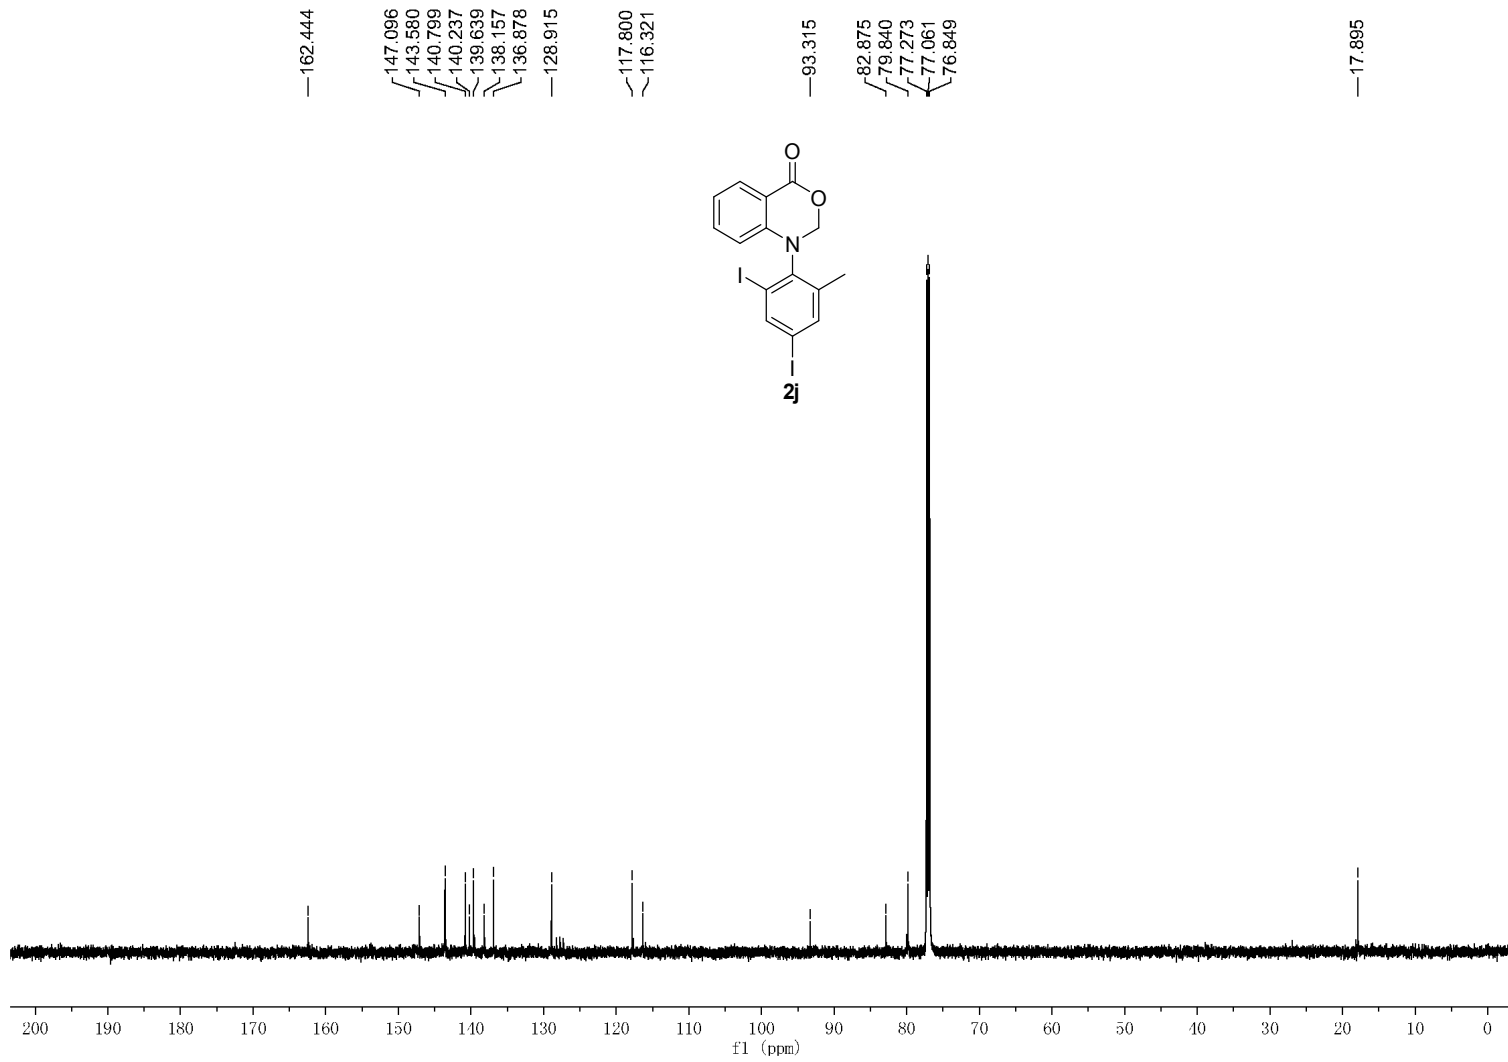

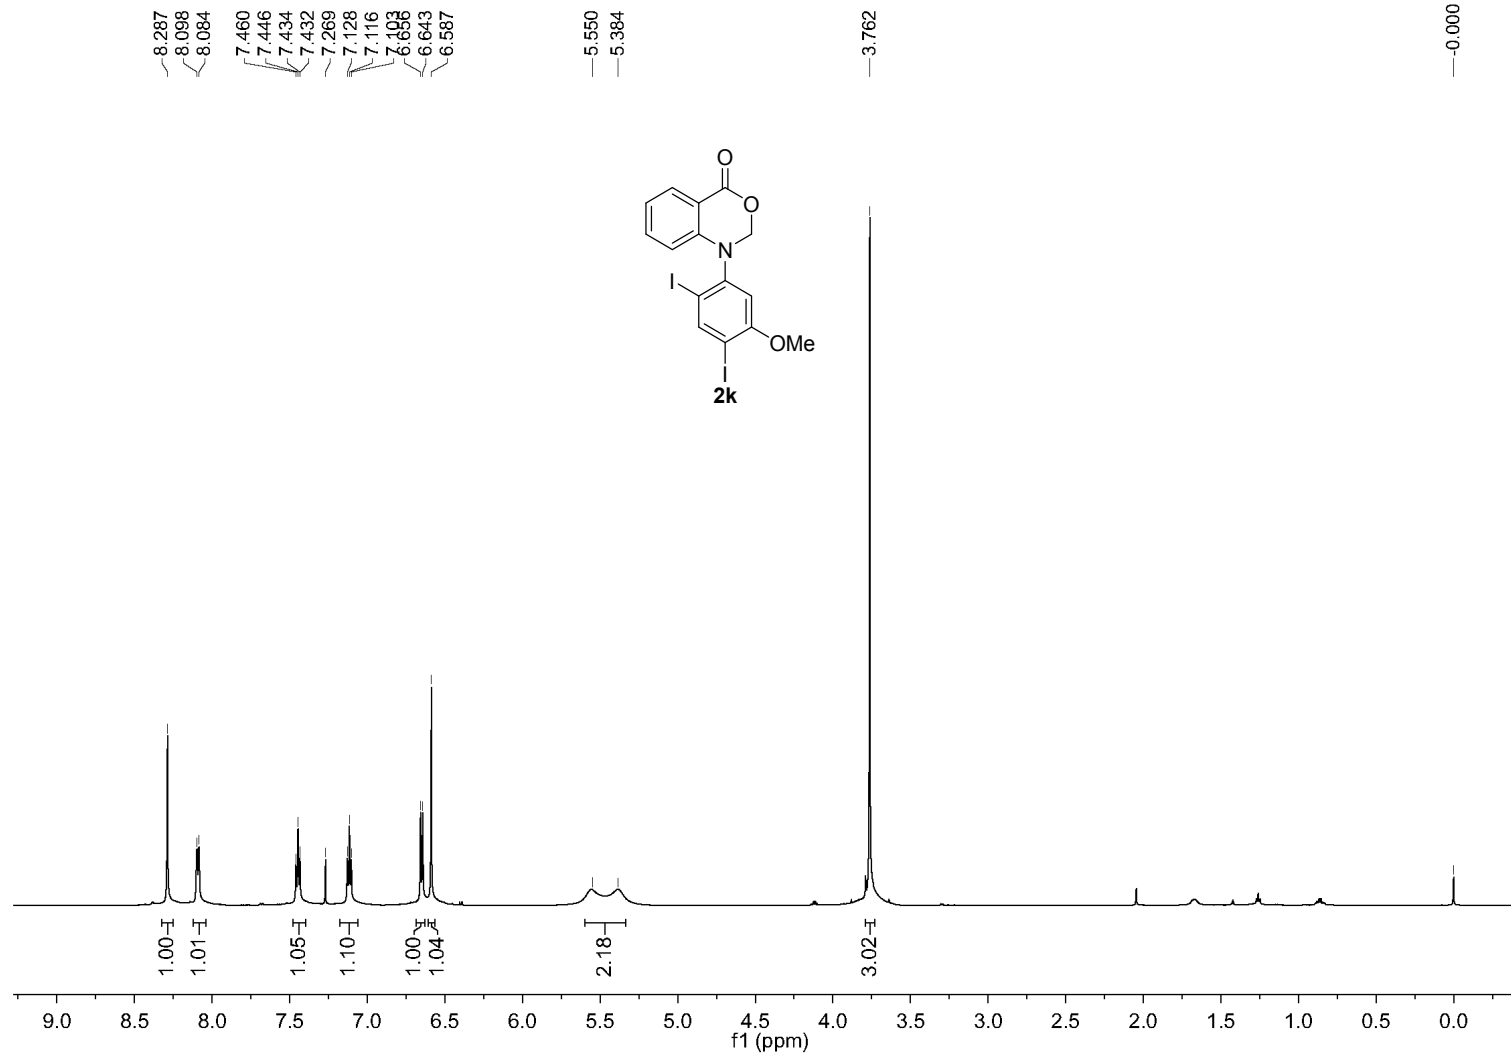

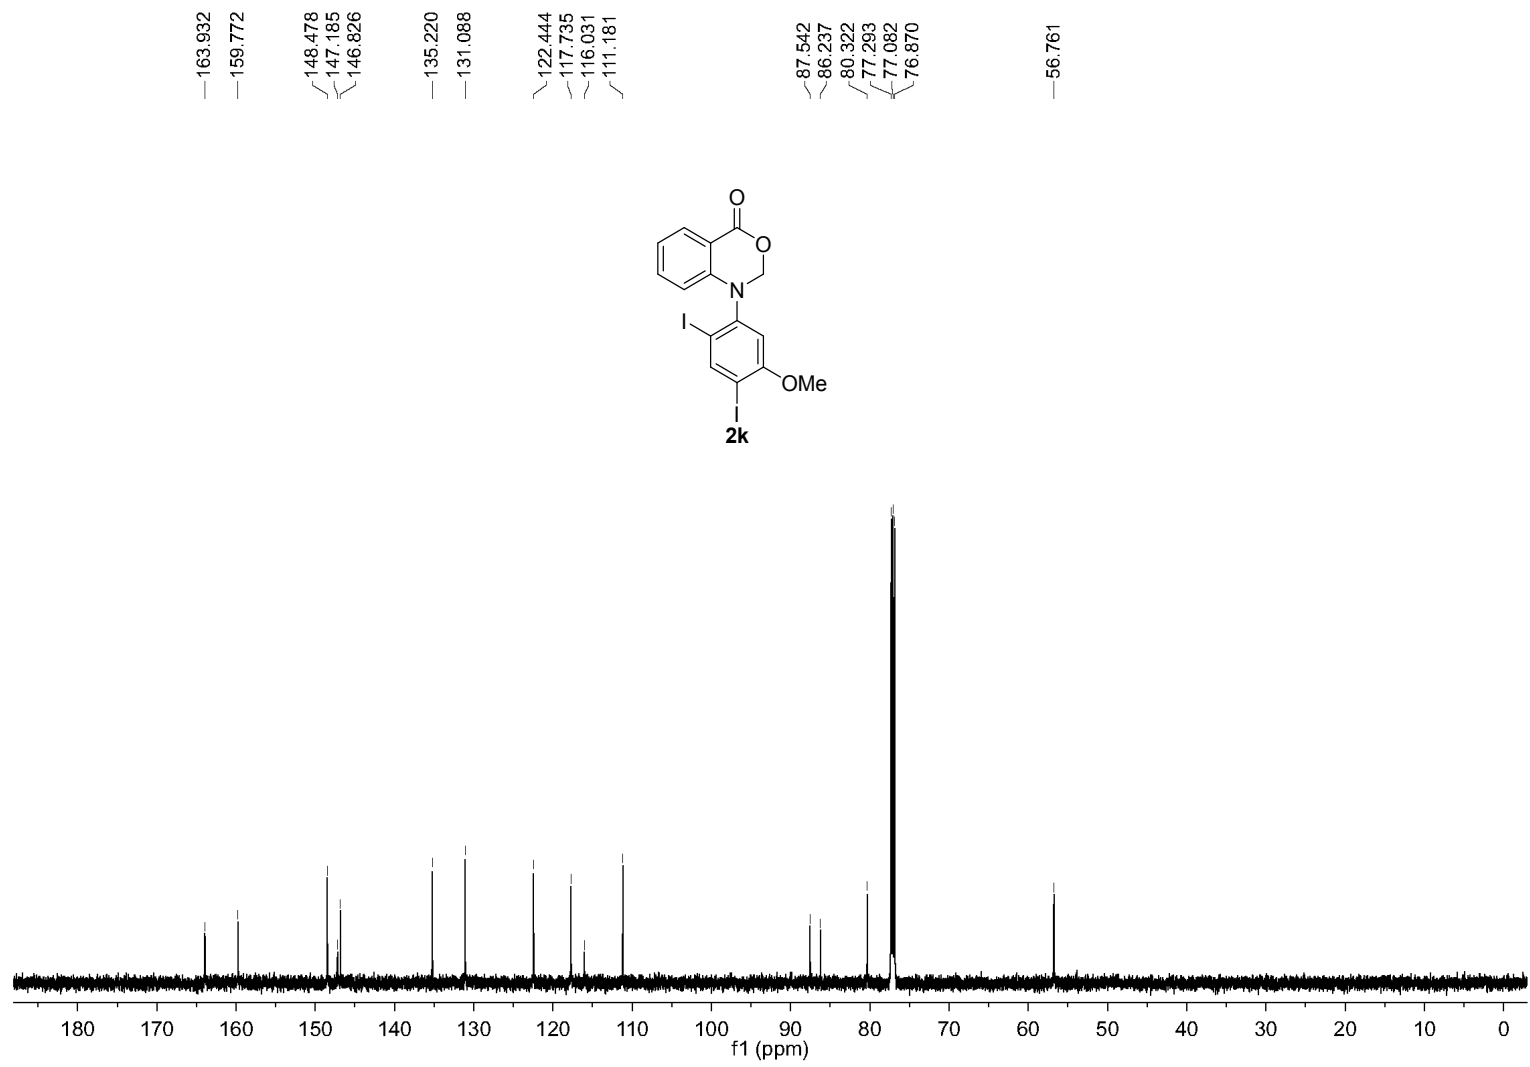

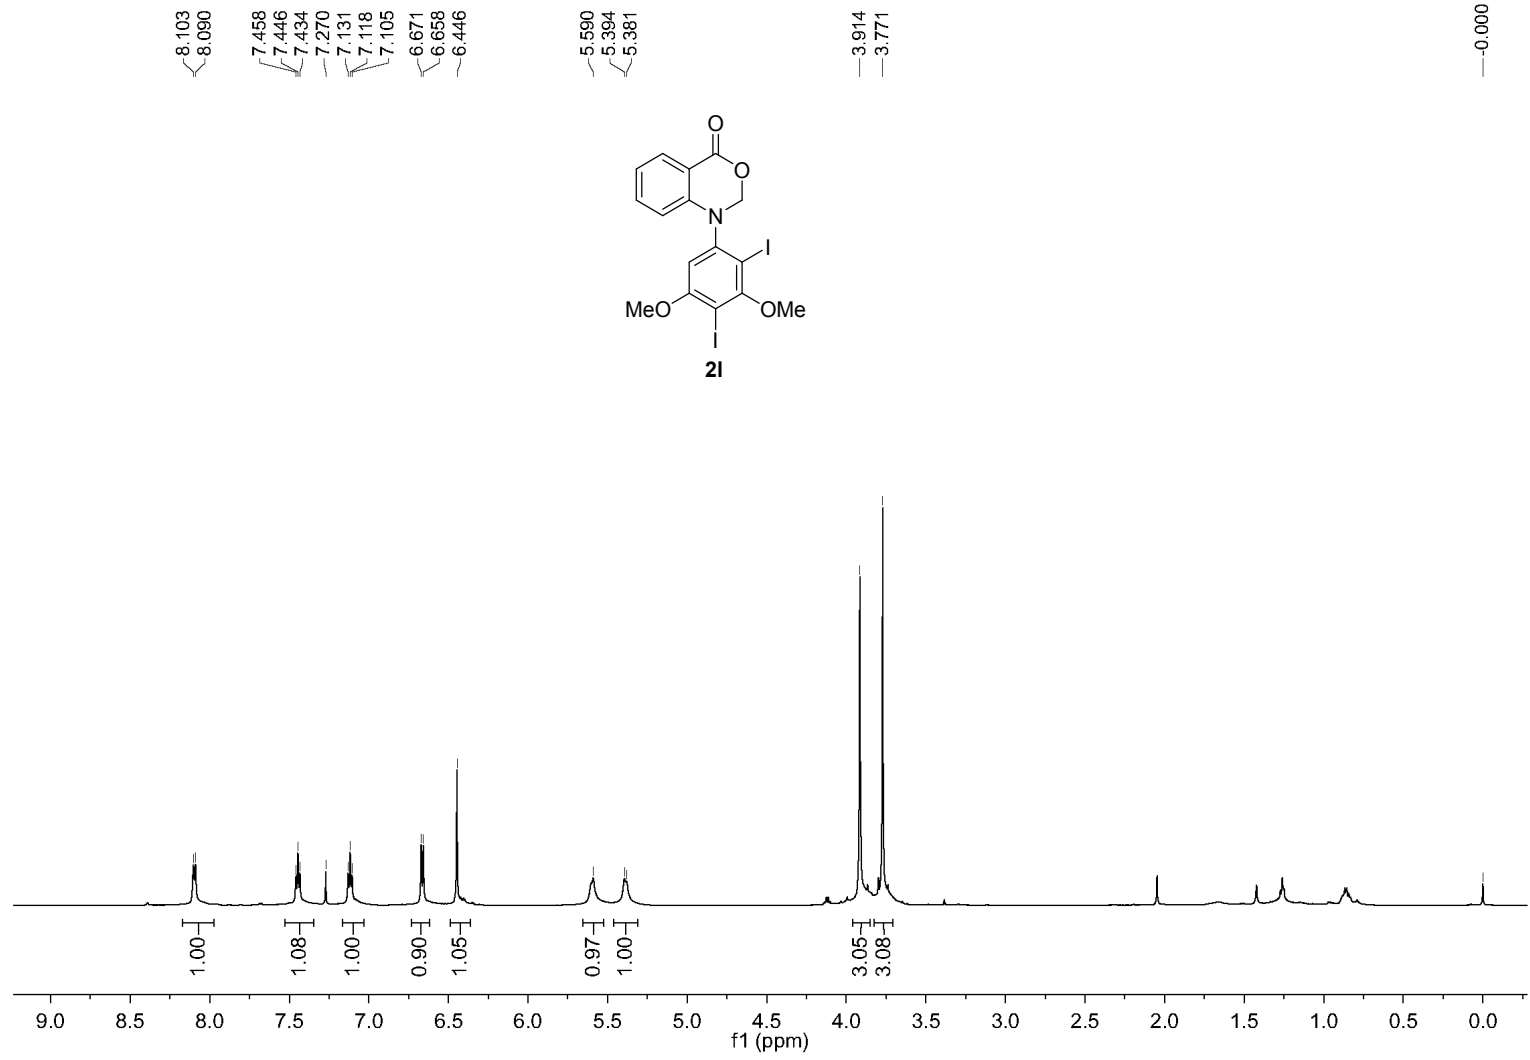

164.016  
161.514  
160.700  
146.857  
135.206  
131.055  
122.431  
117.846  
116.021  
107.154  
85.179  
82.696  
80.447  
77.289  
77.077  
76.865  
60.763  
57.056

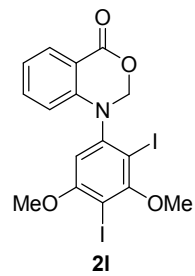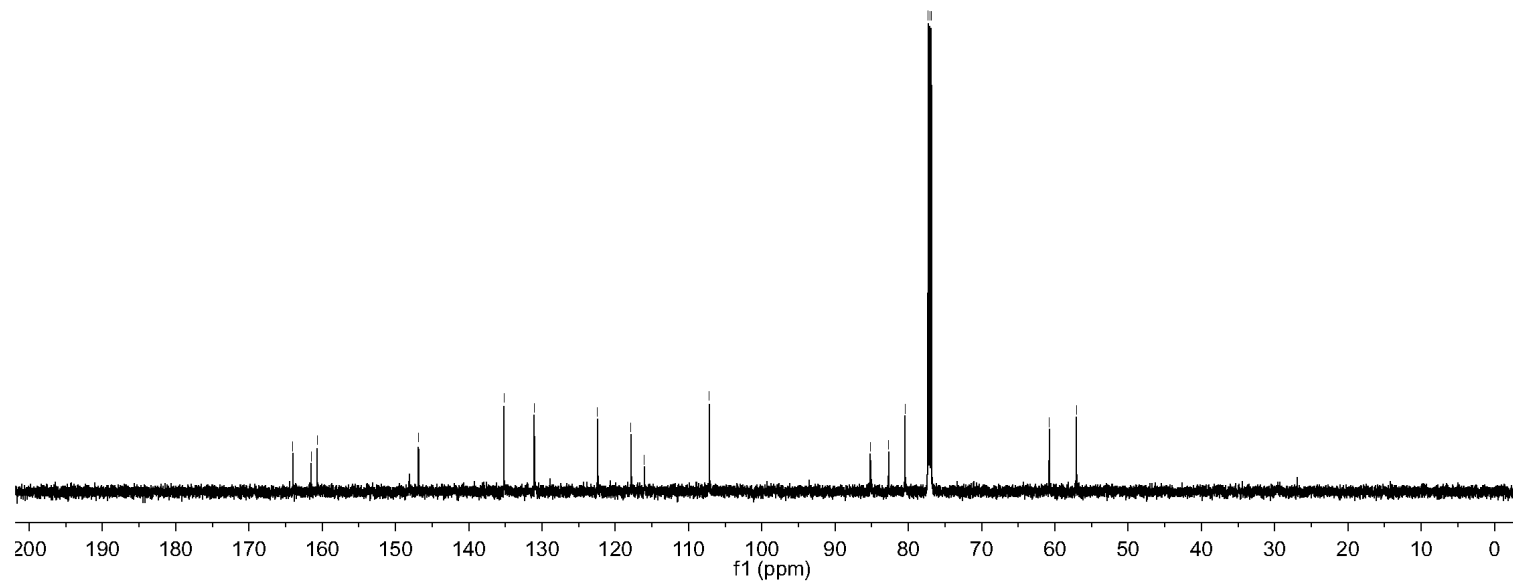

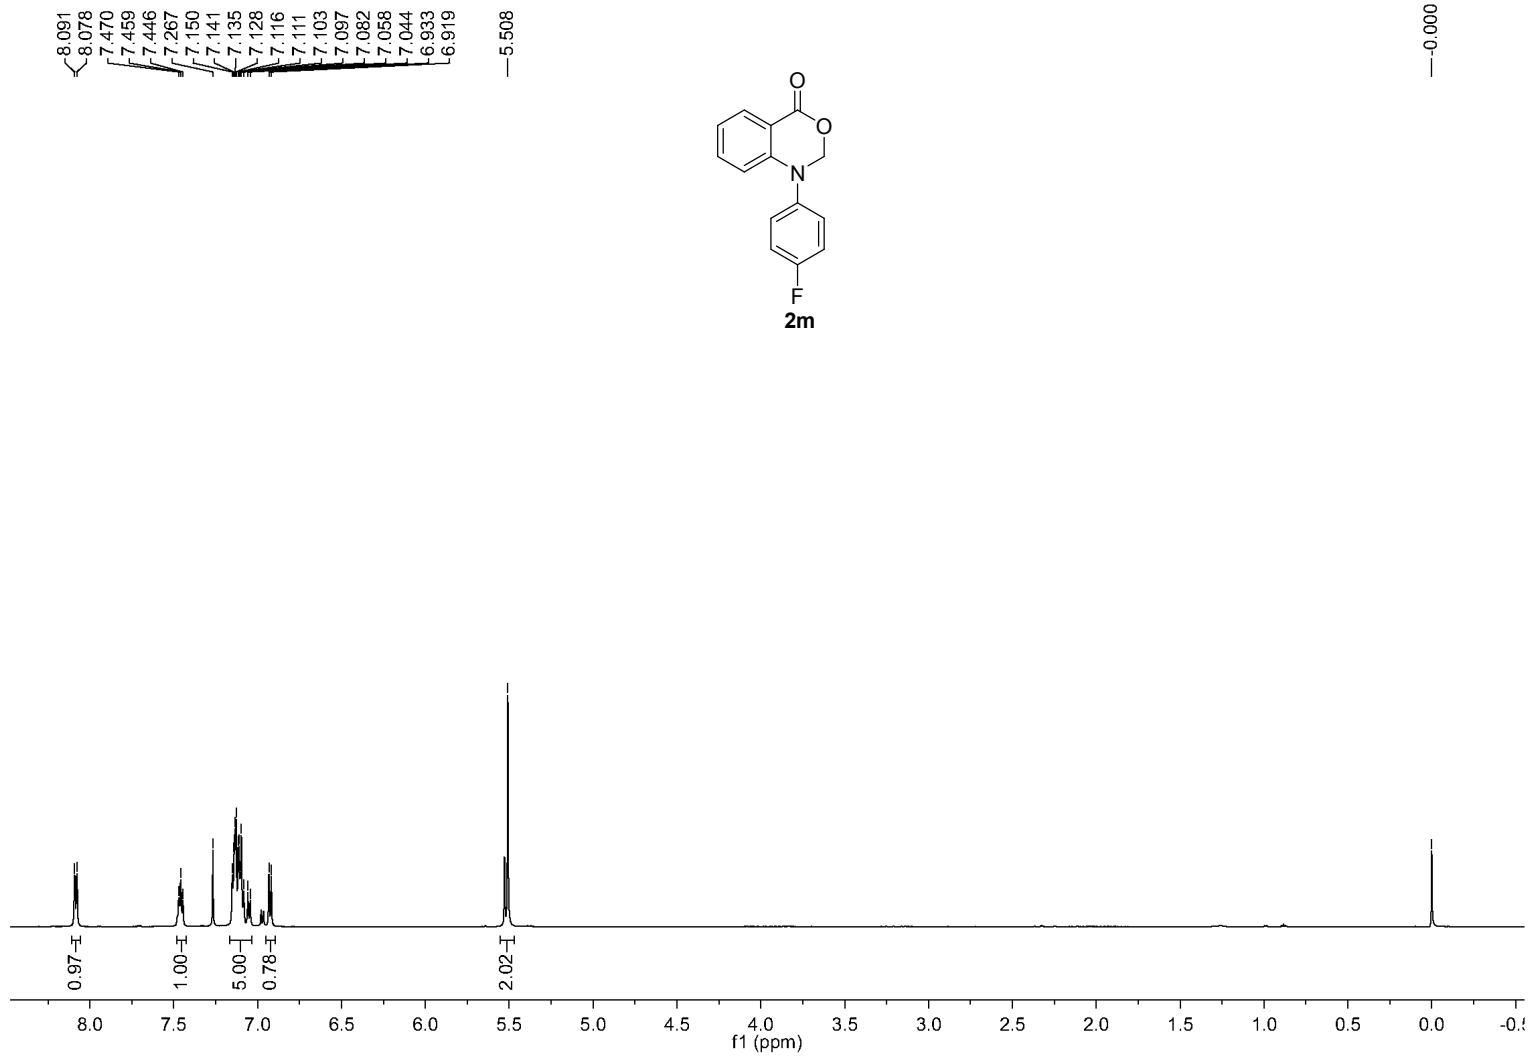

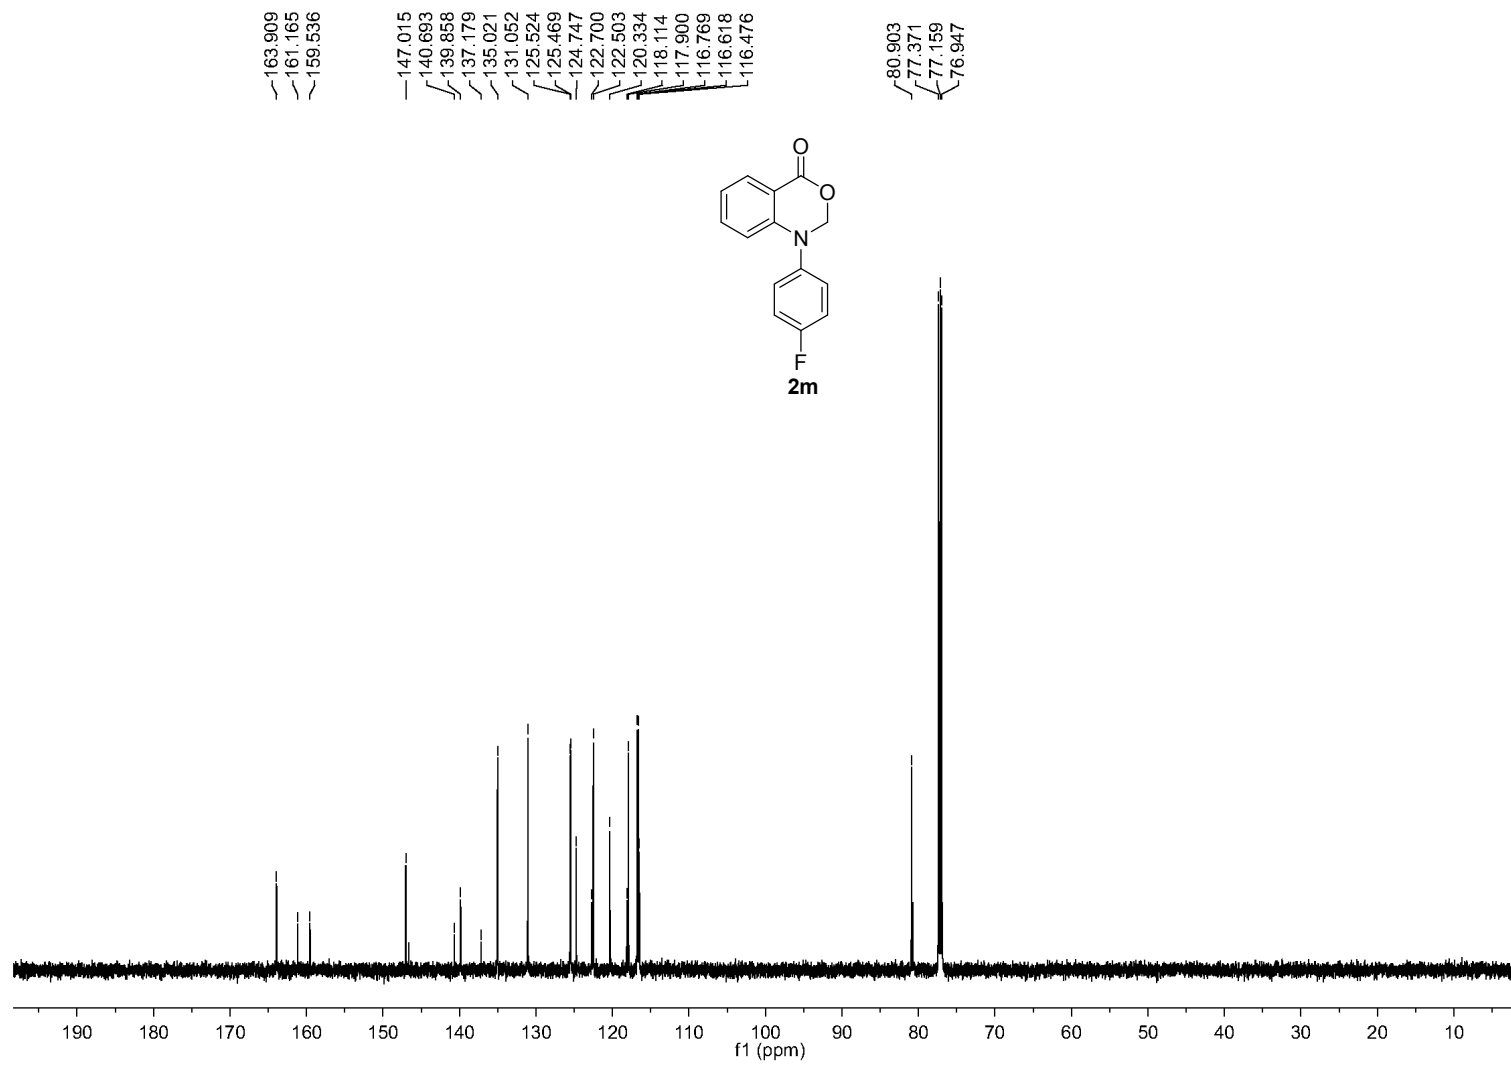

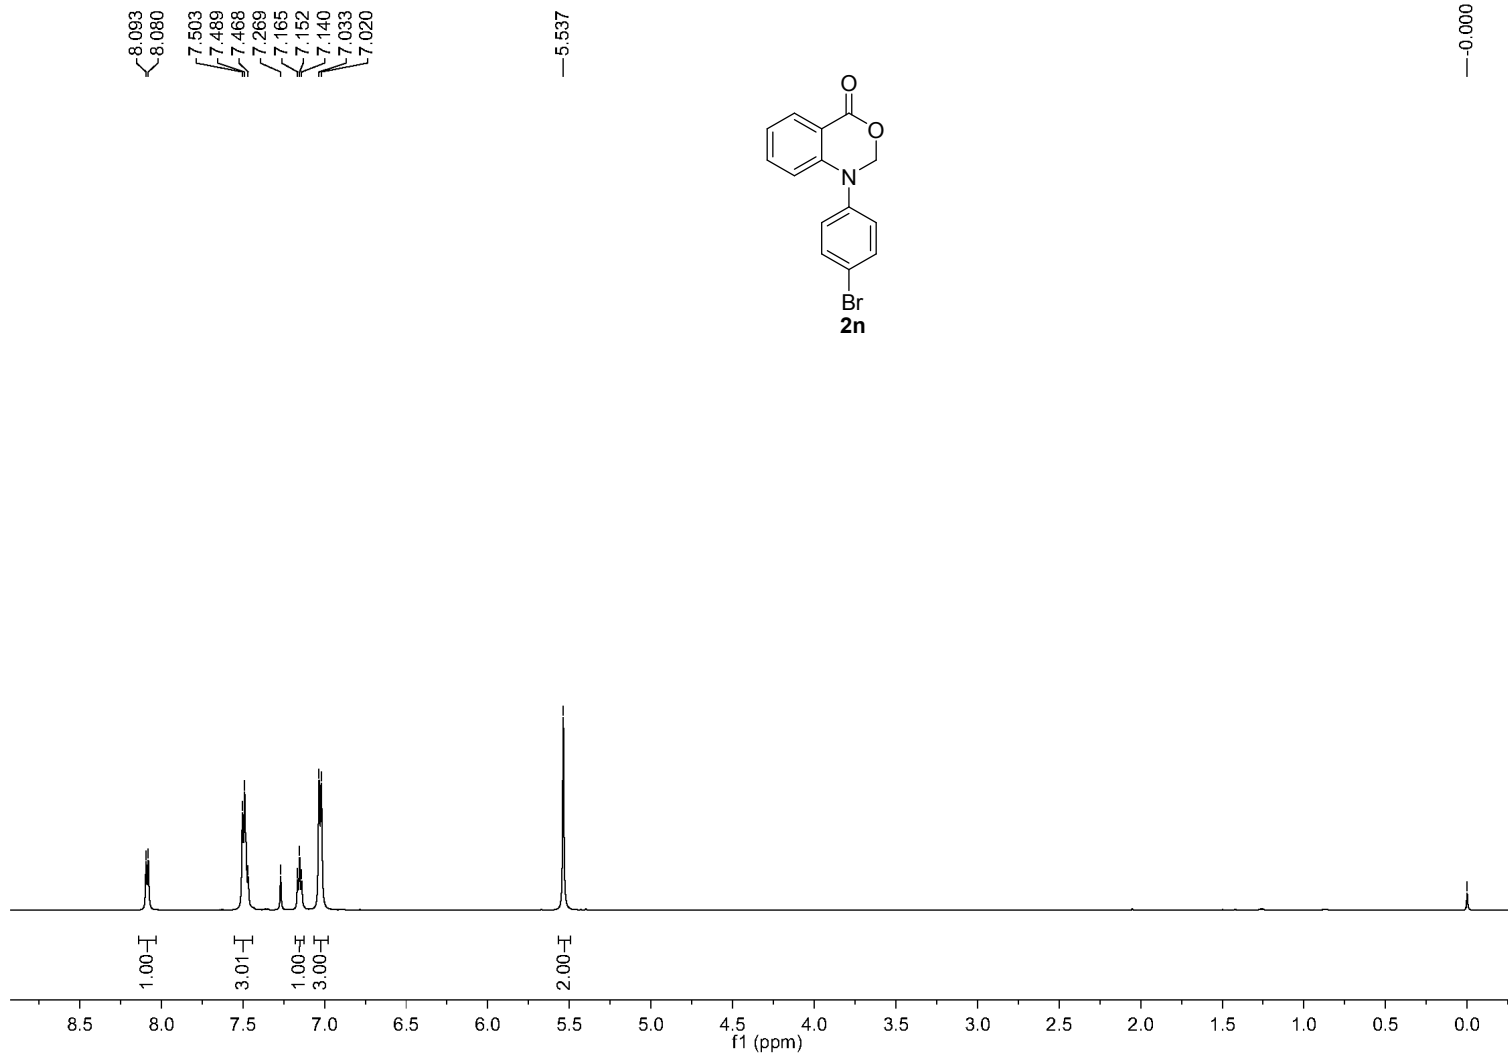



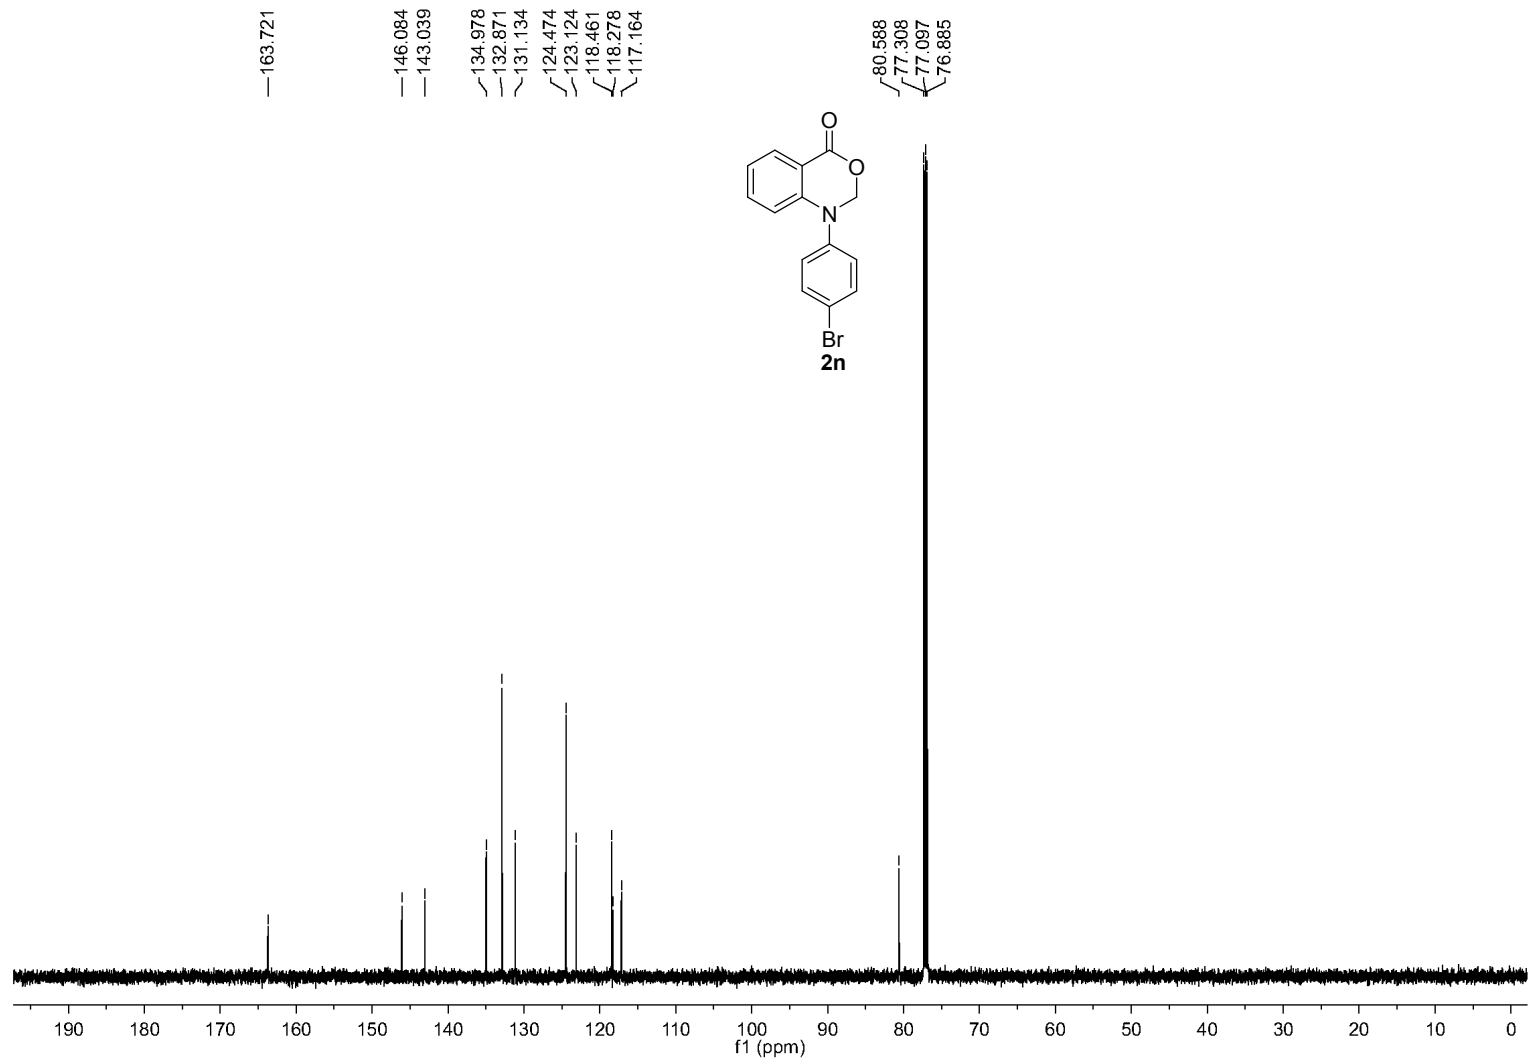

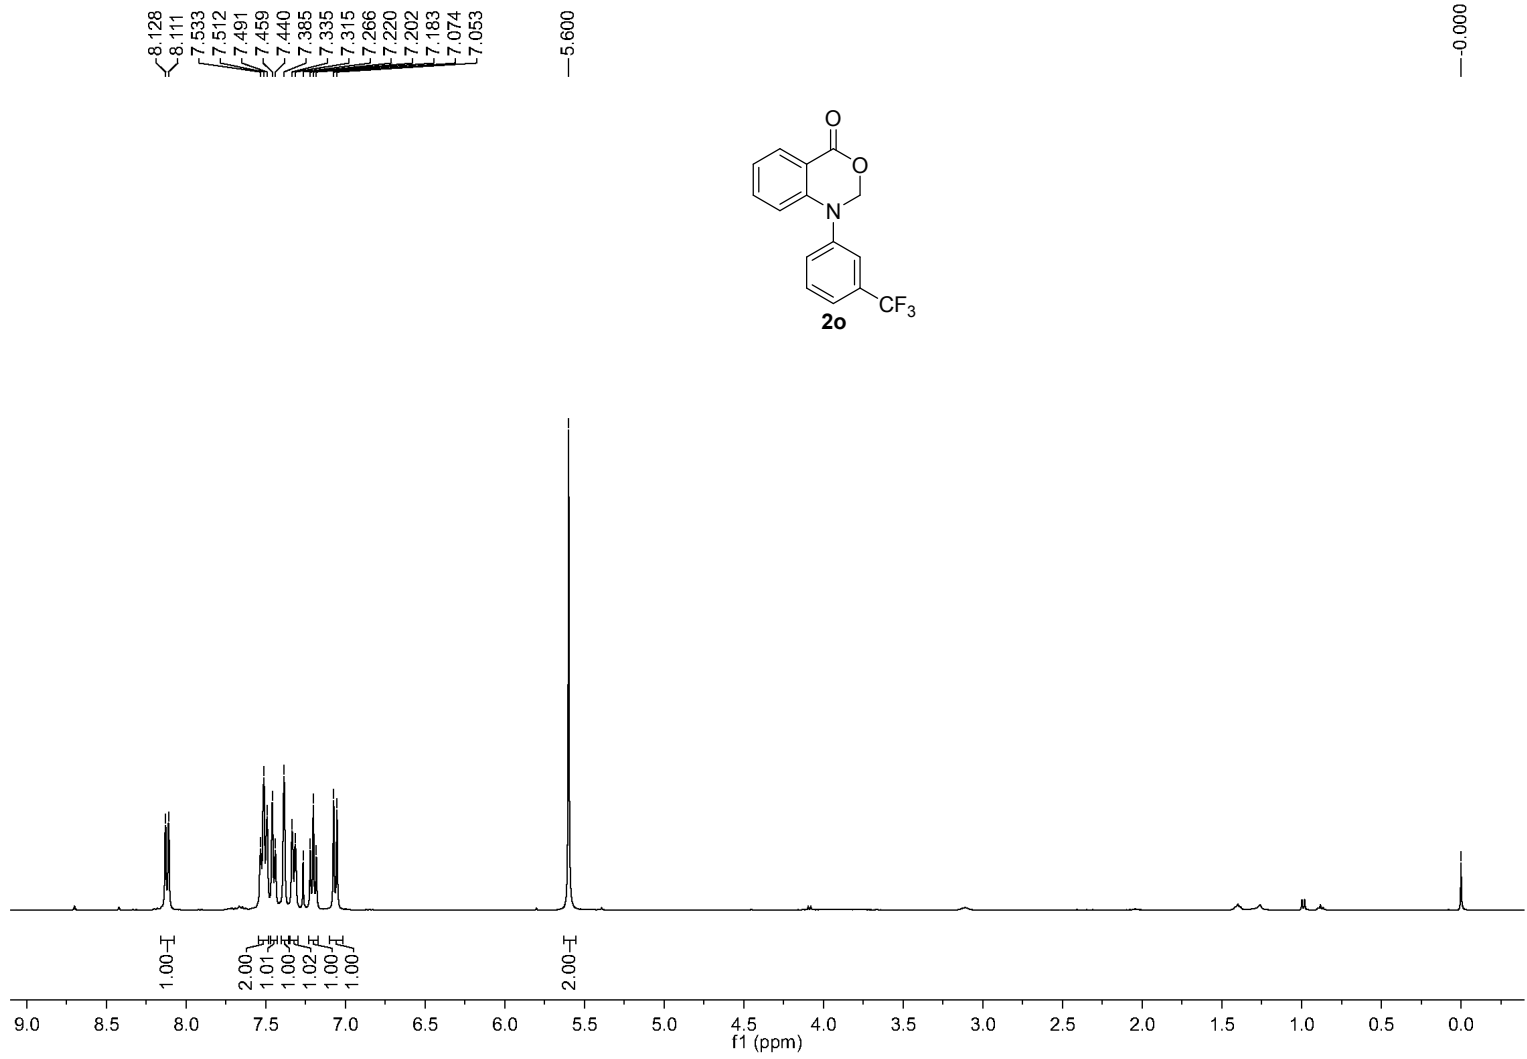

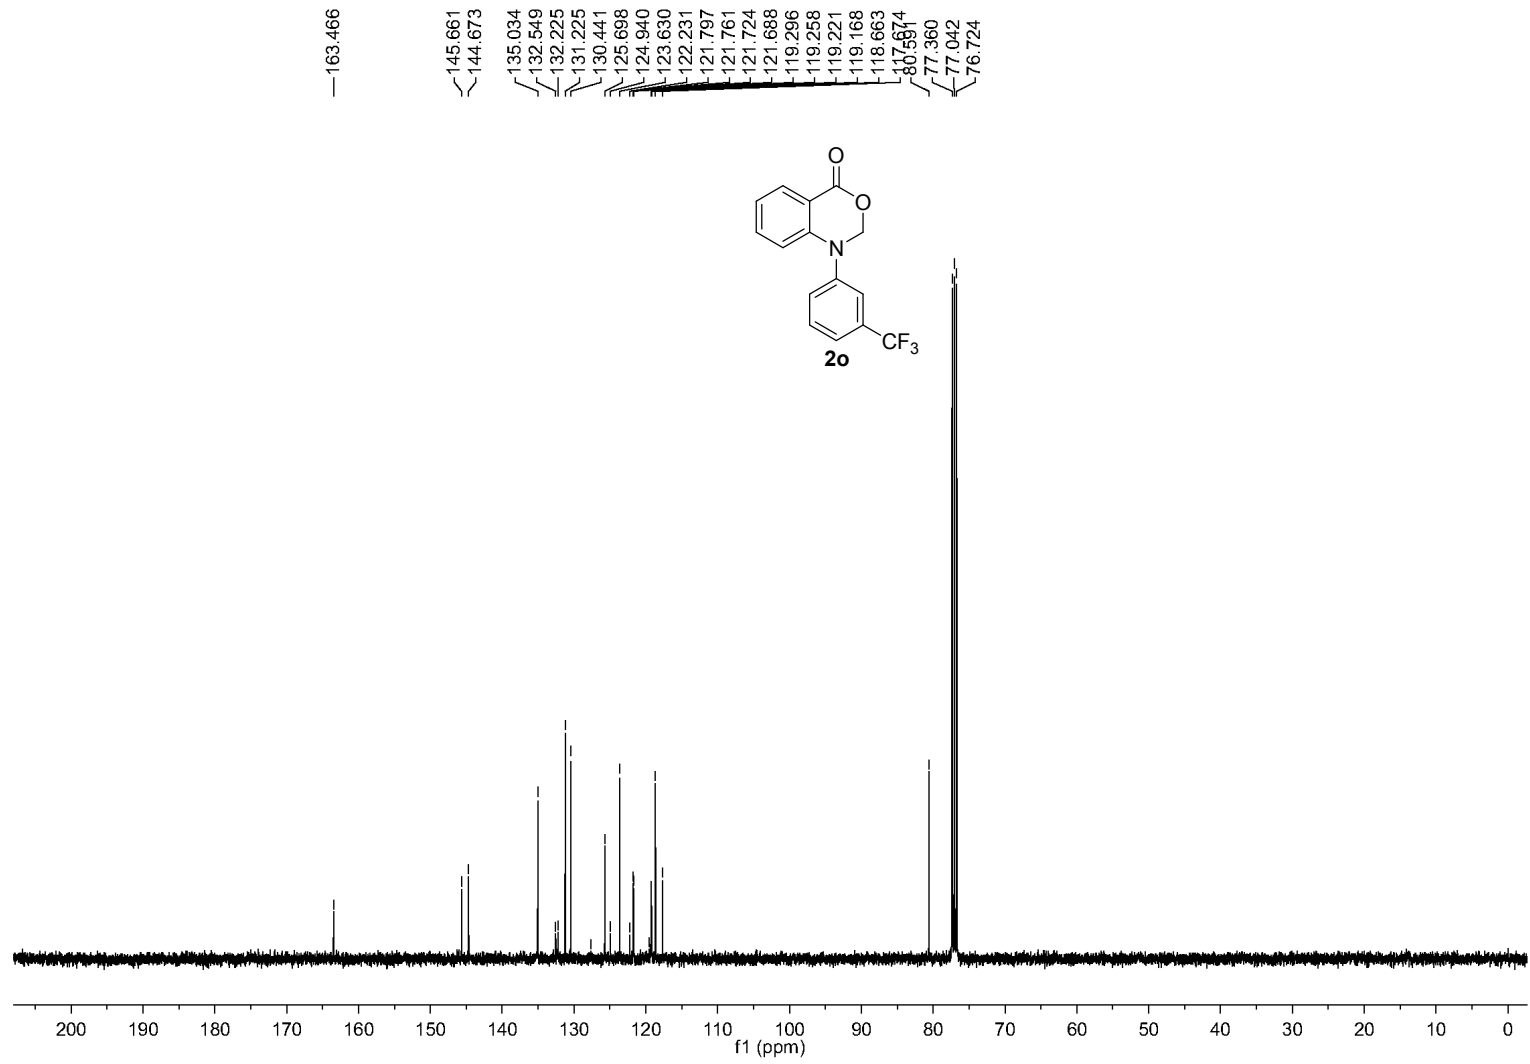

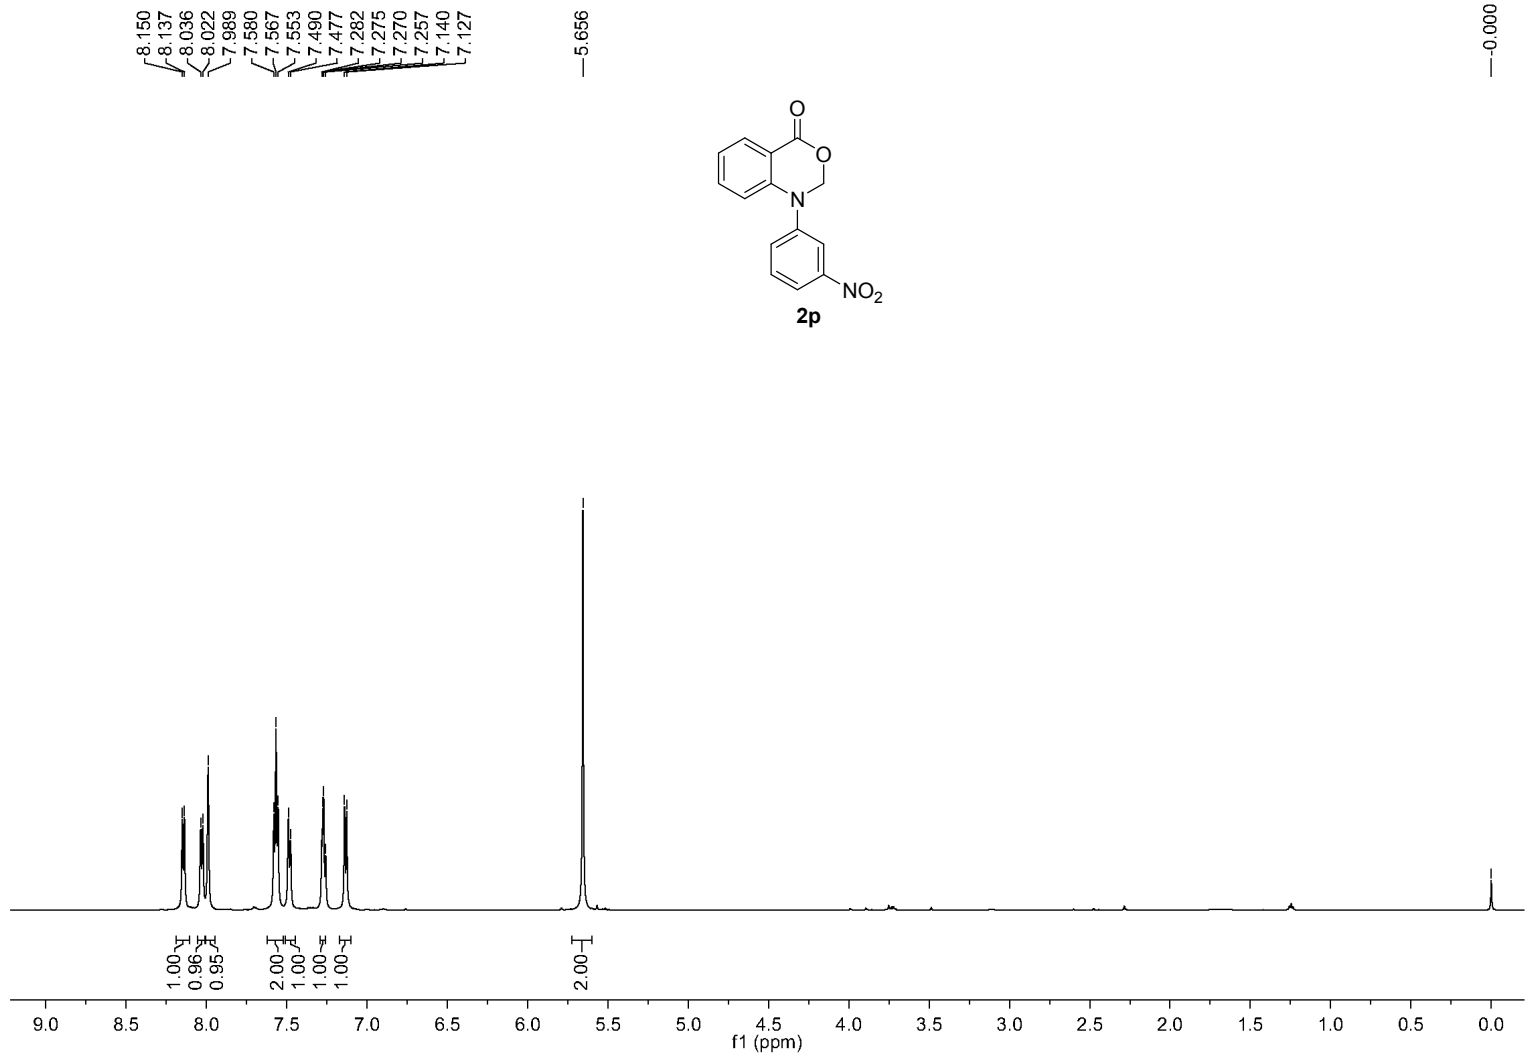

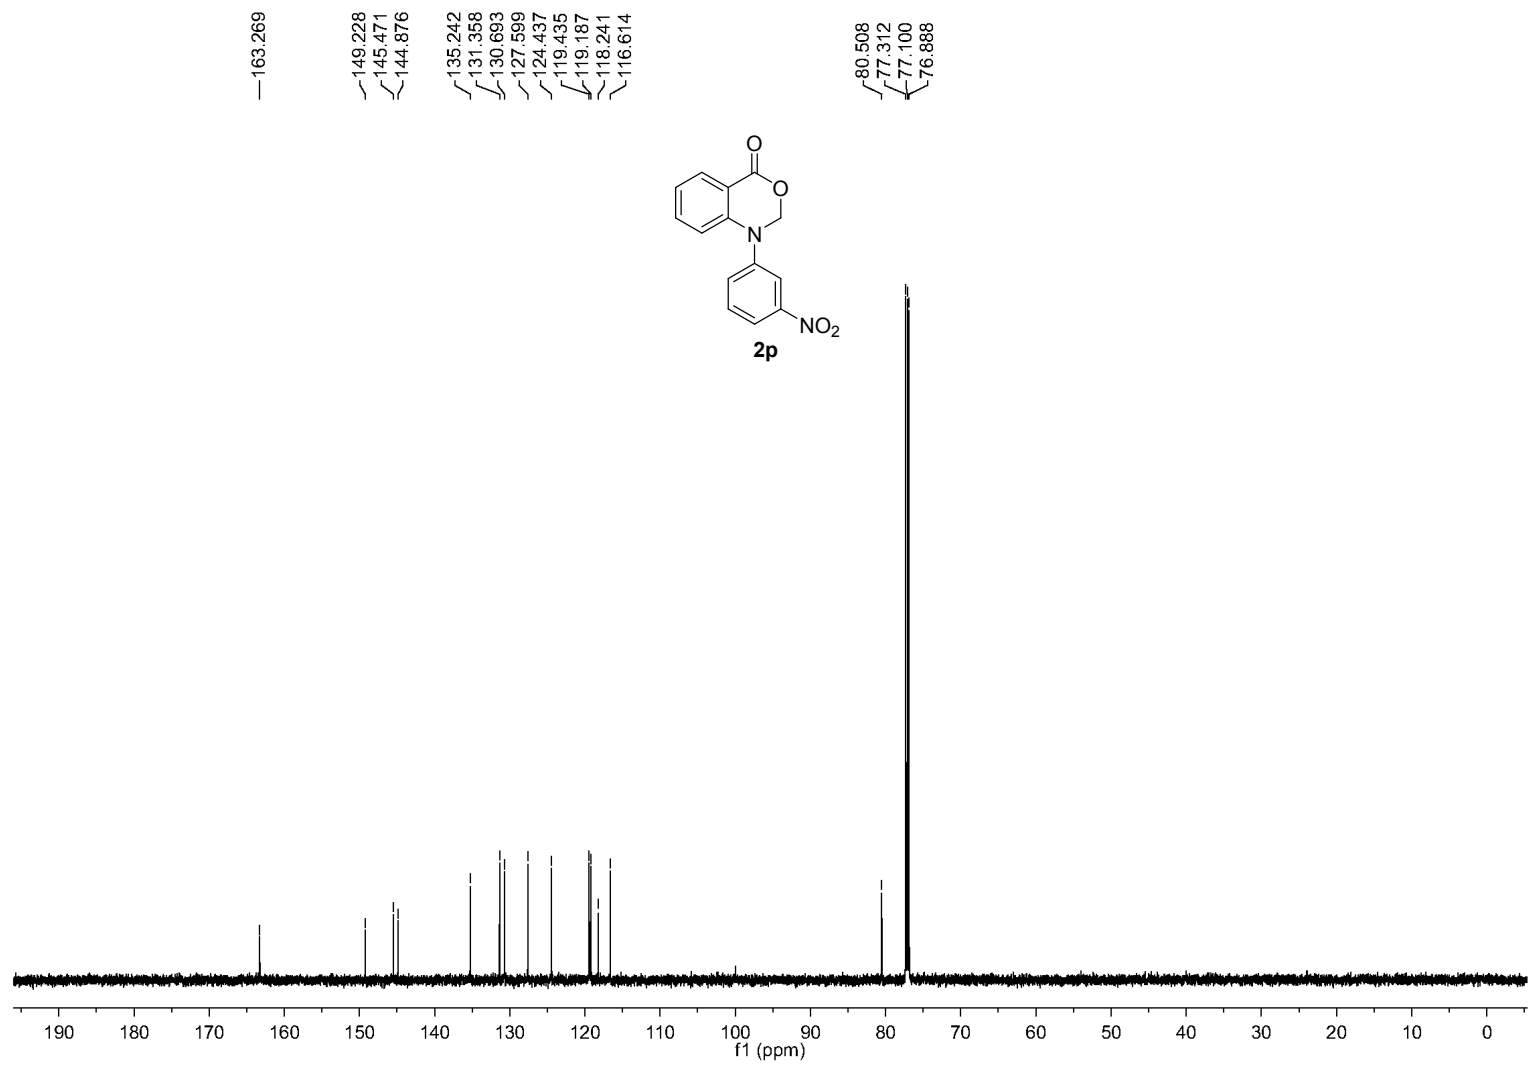

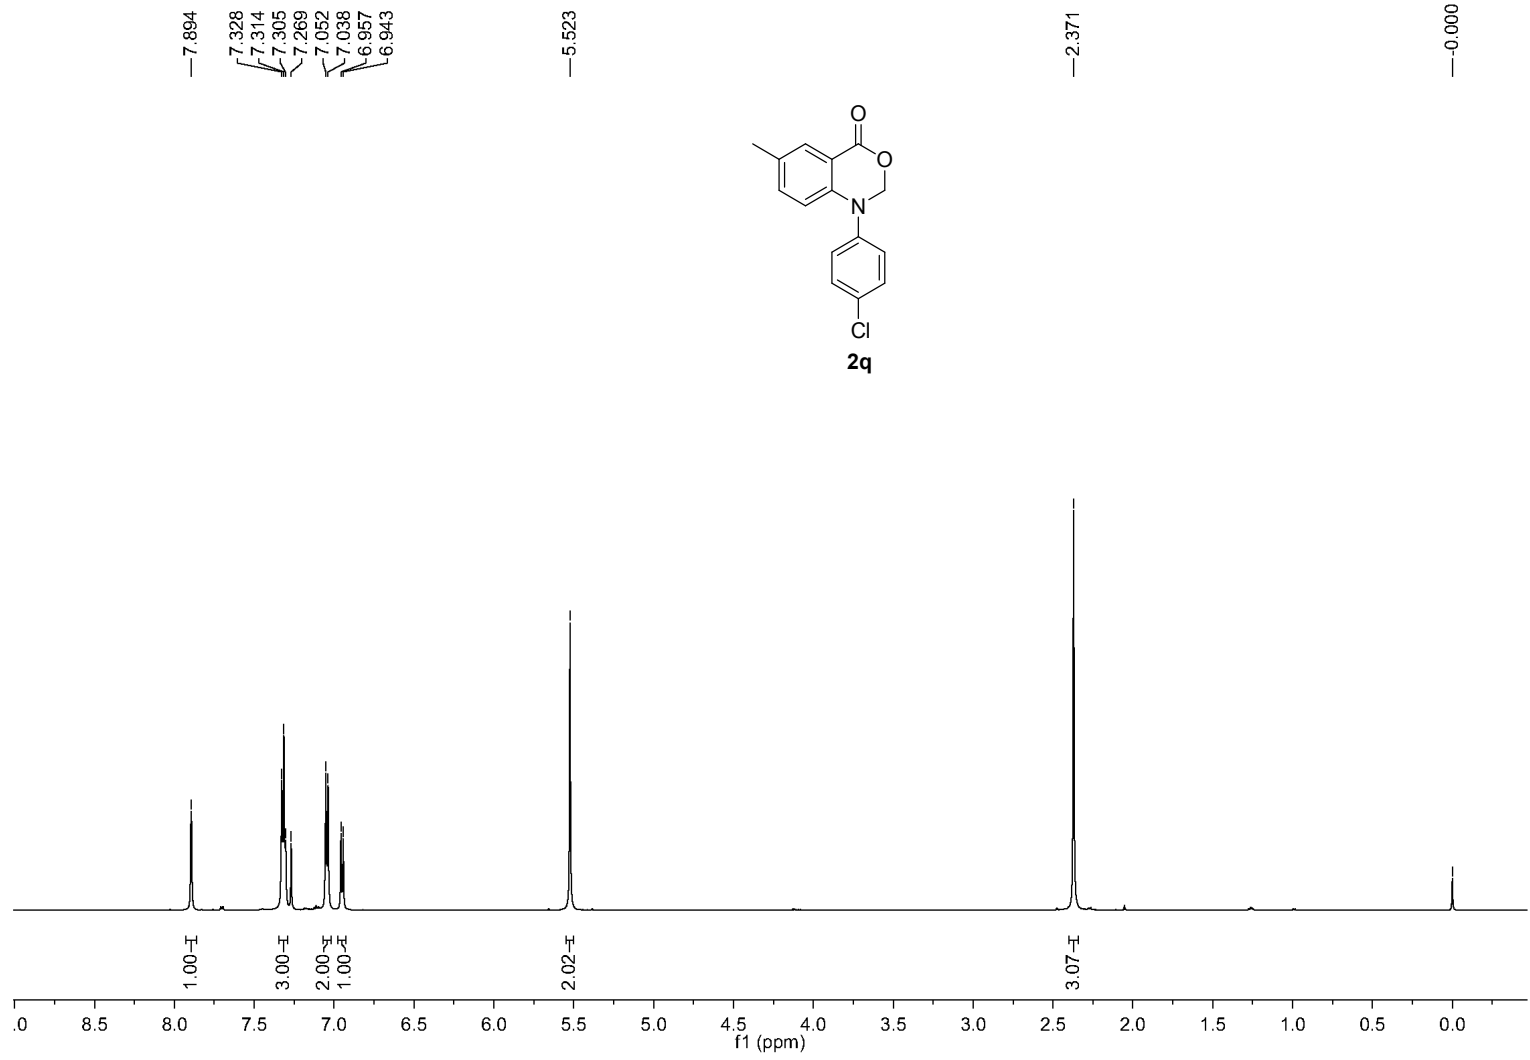

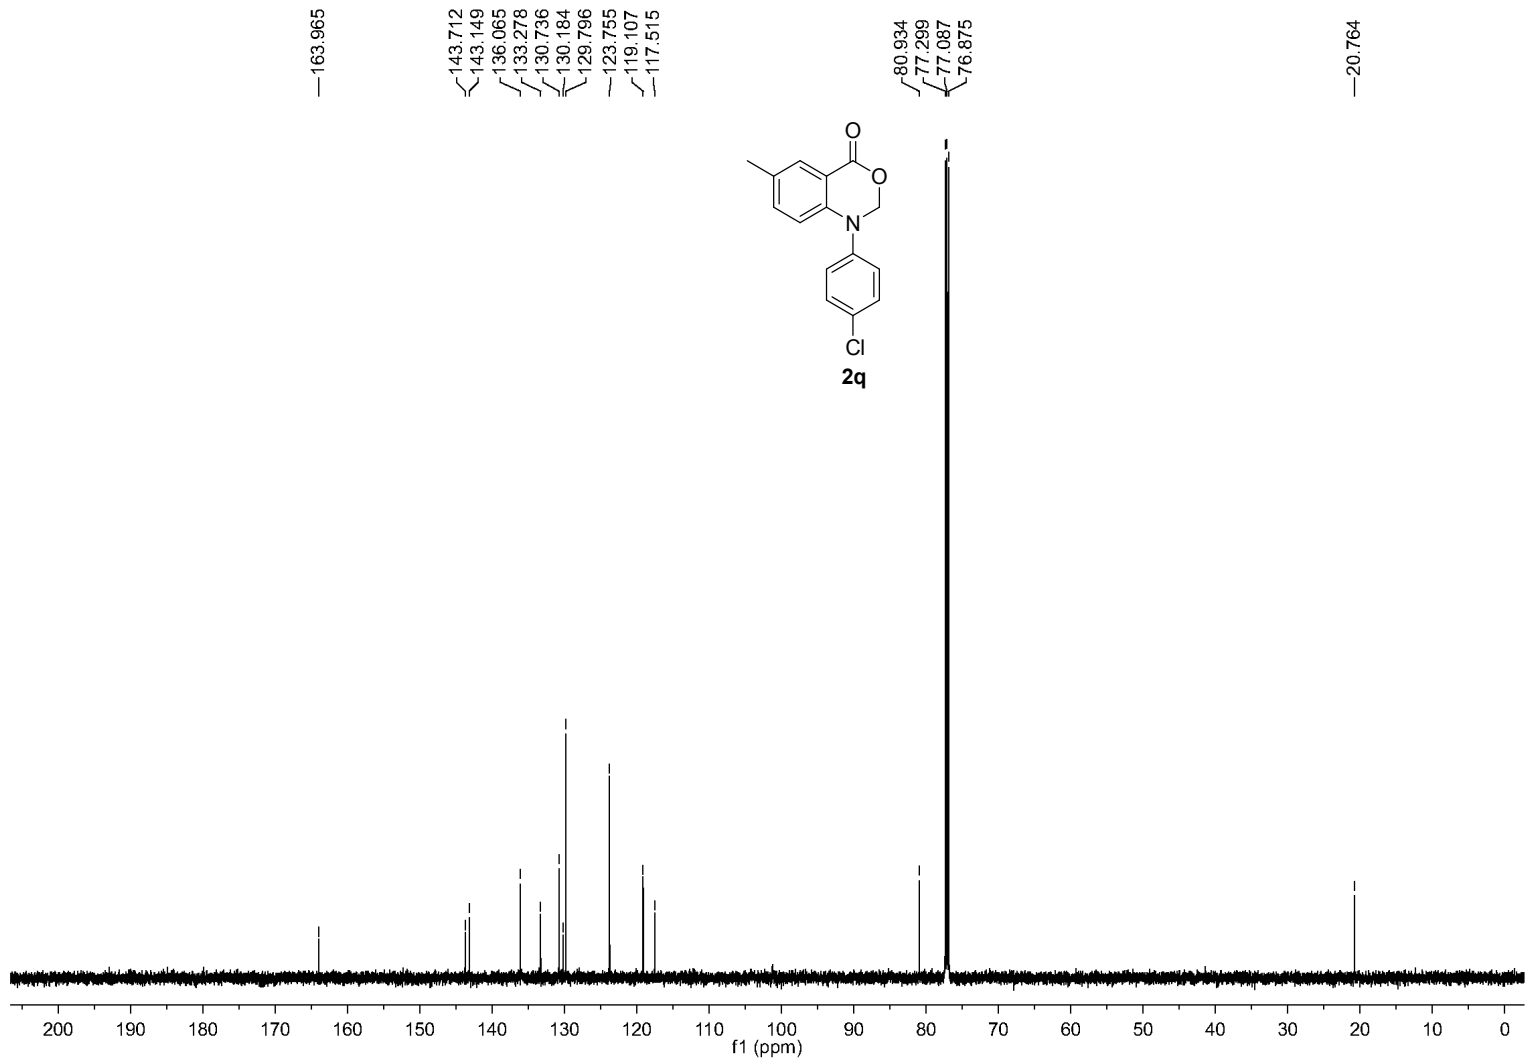

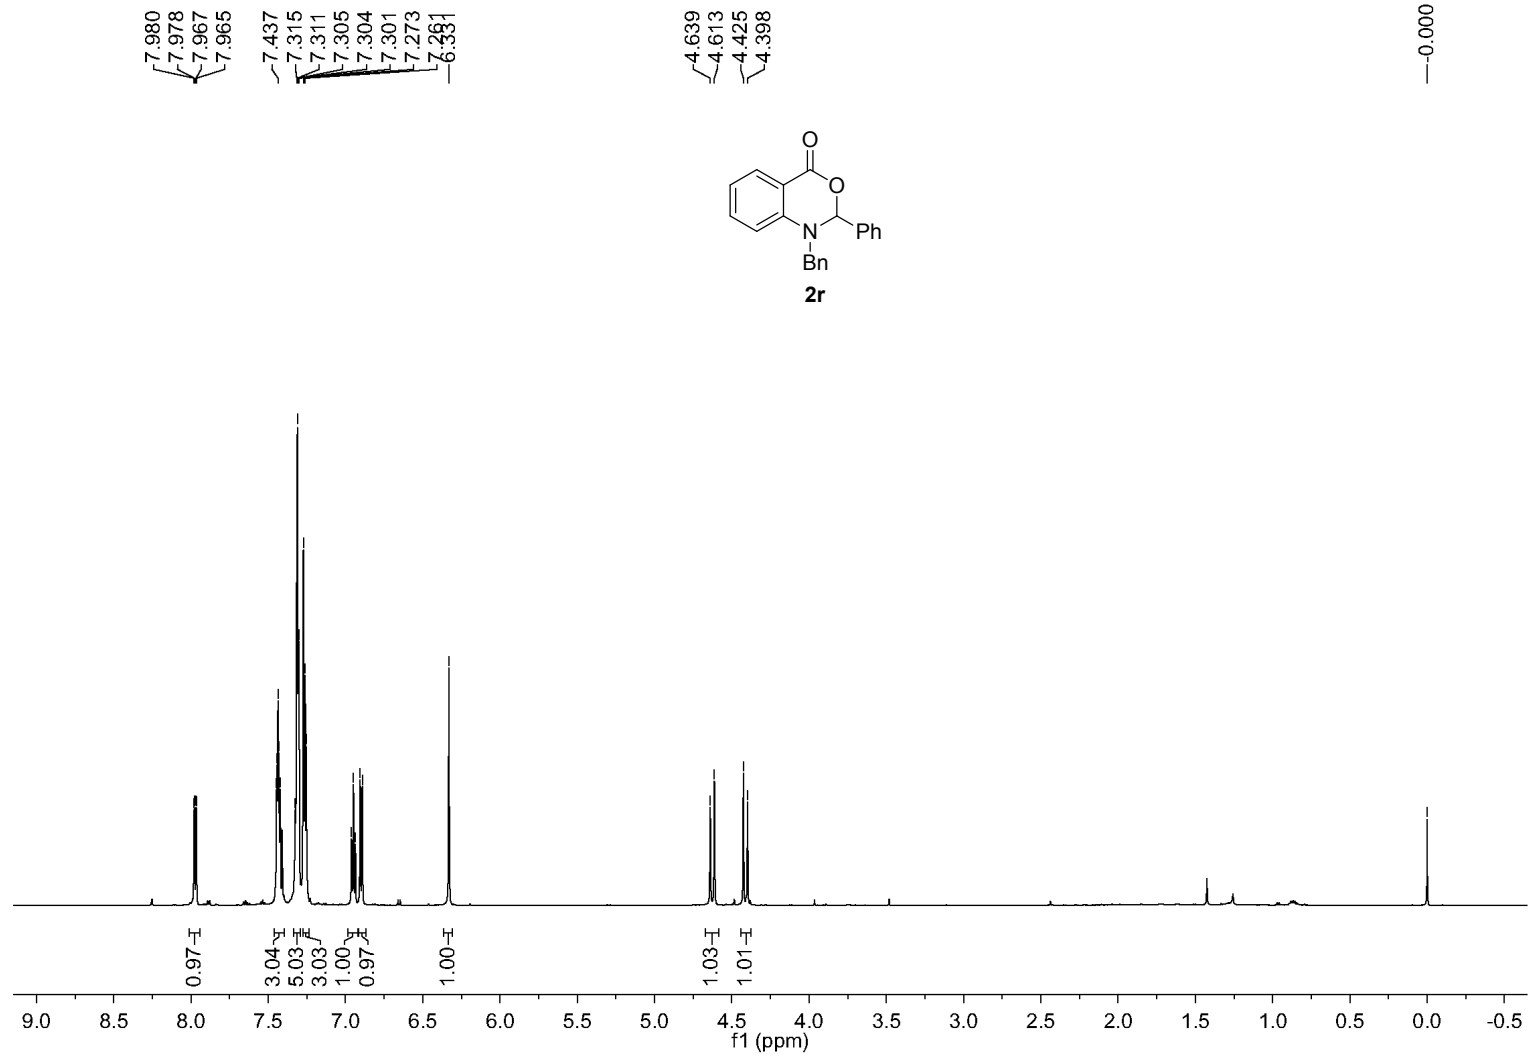



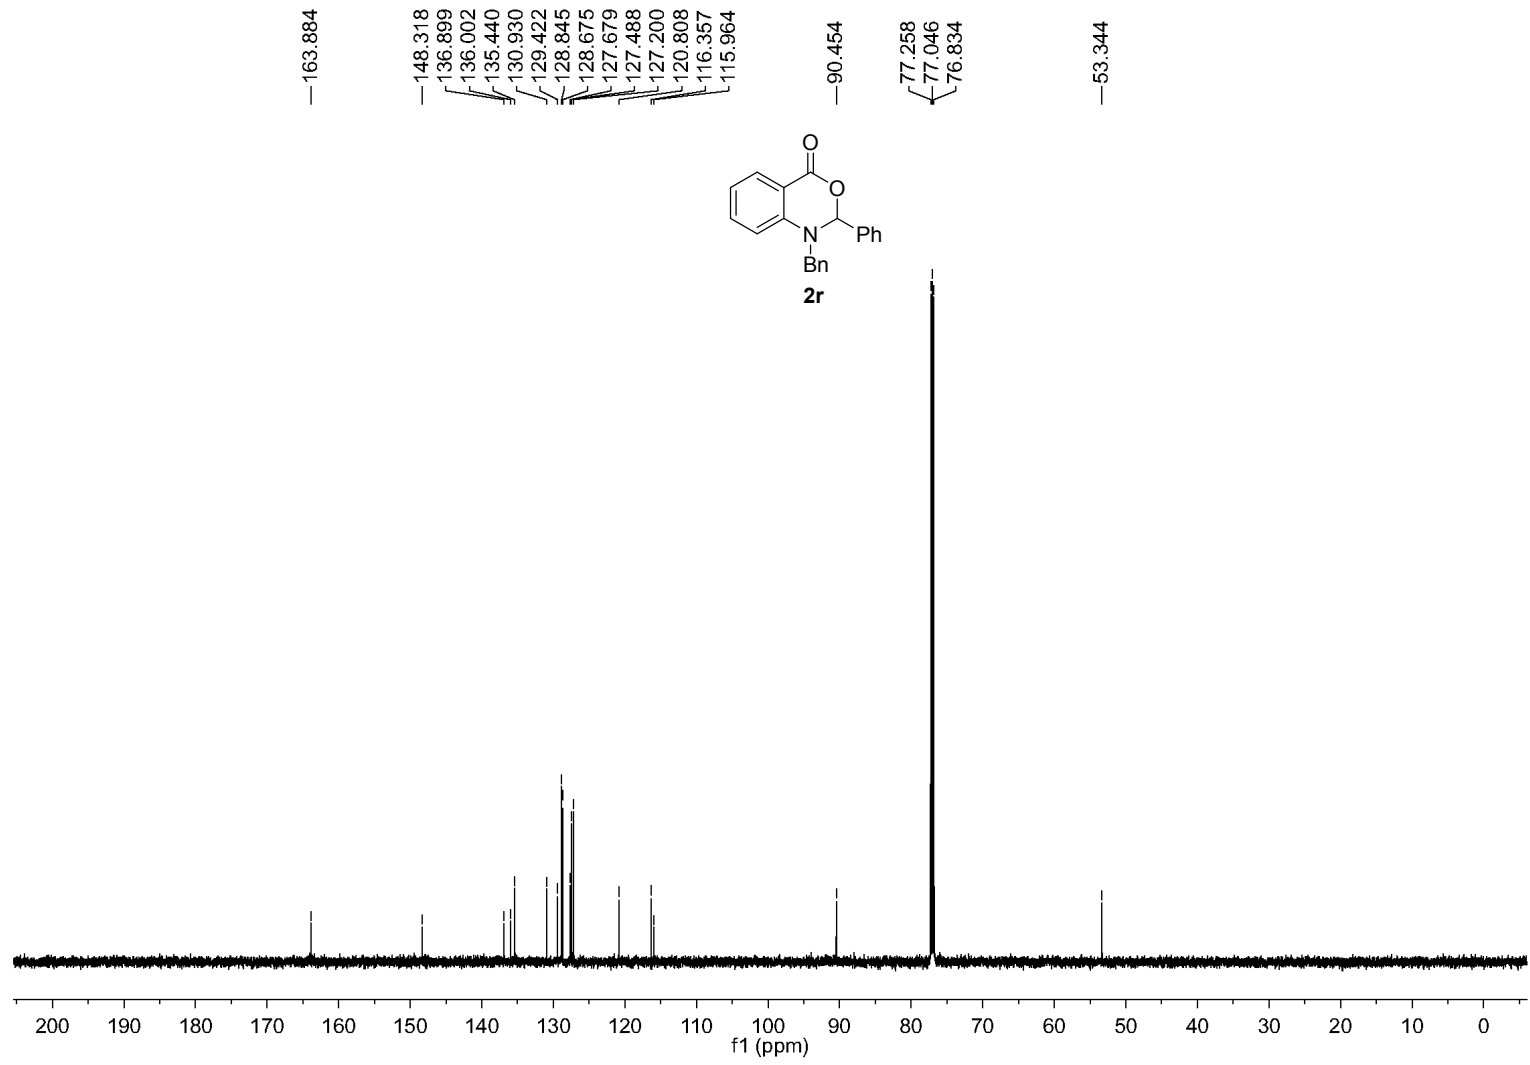

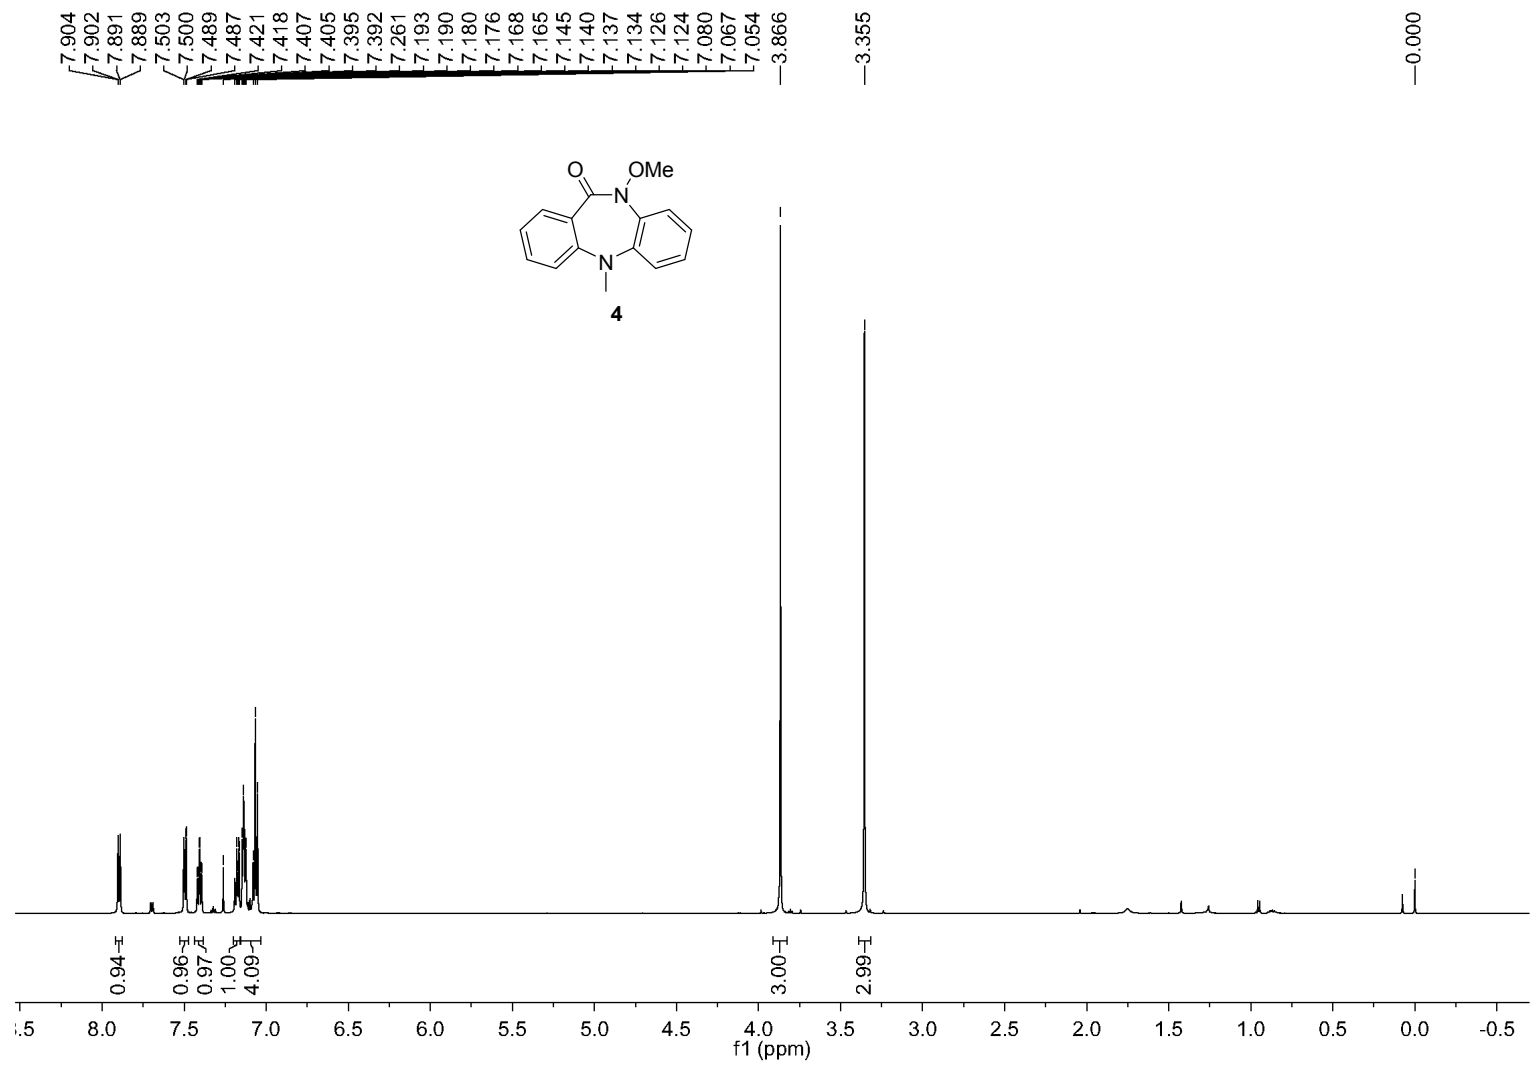

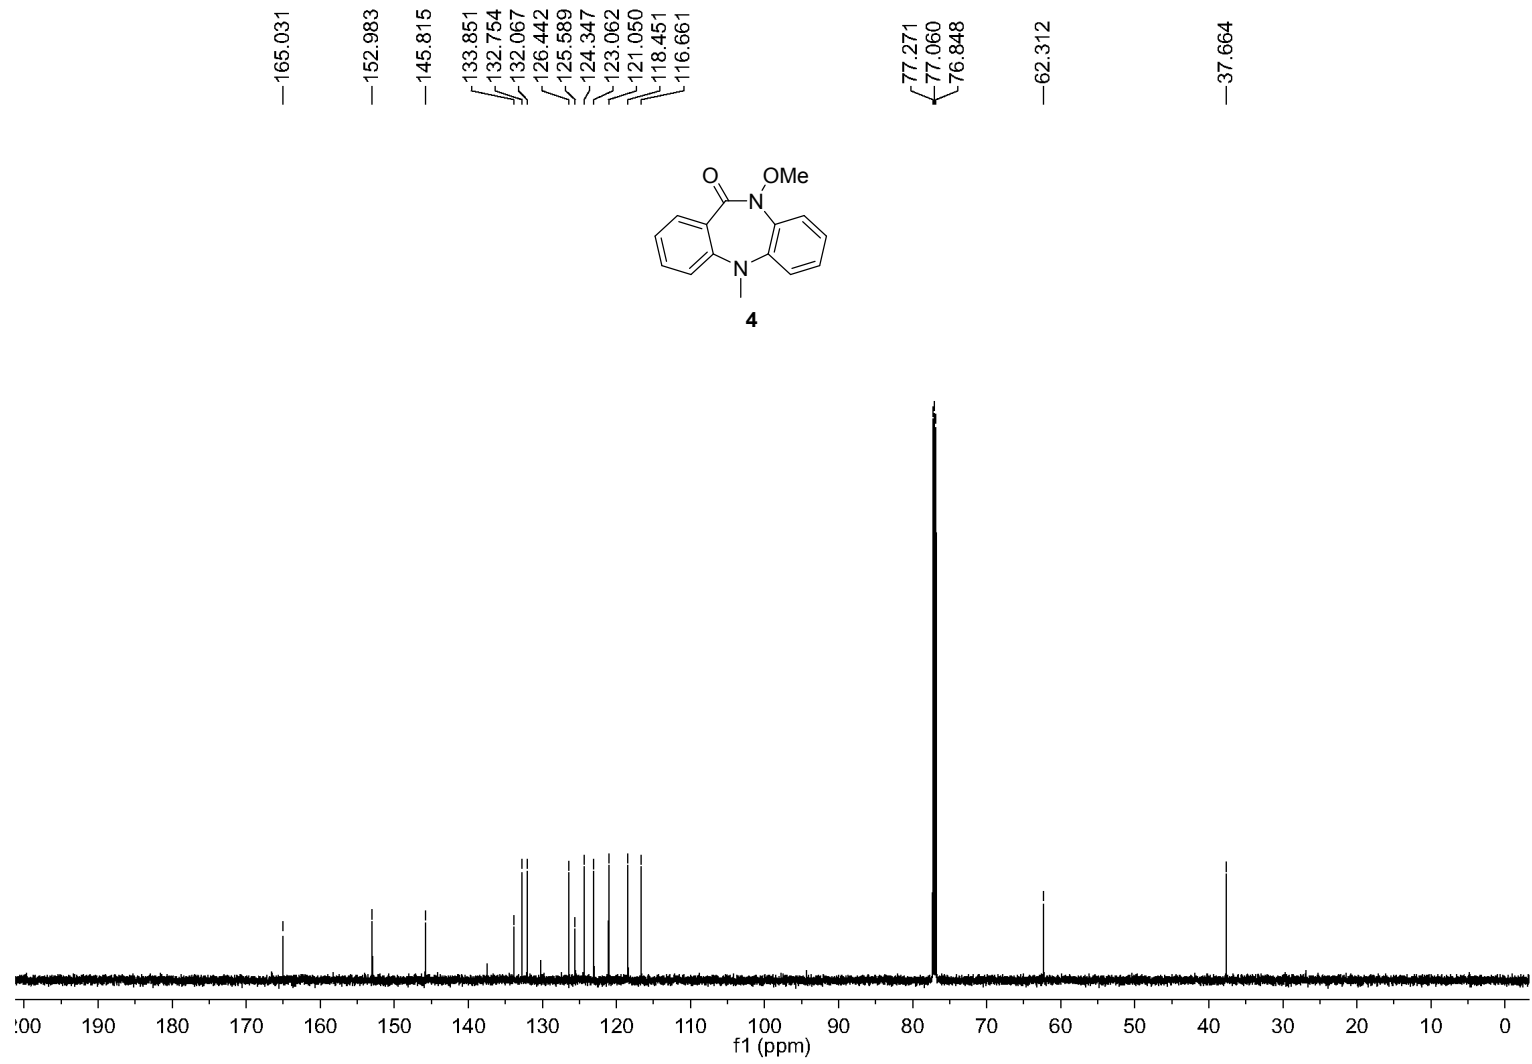

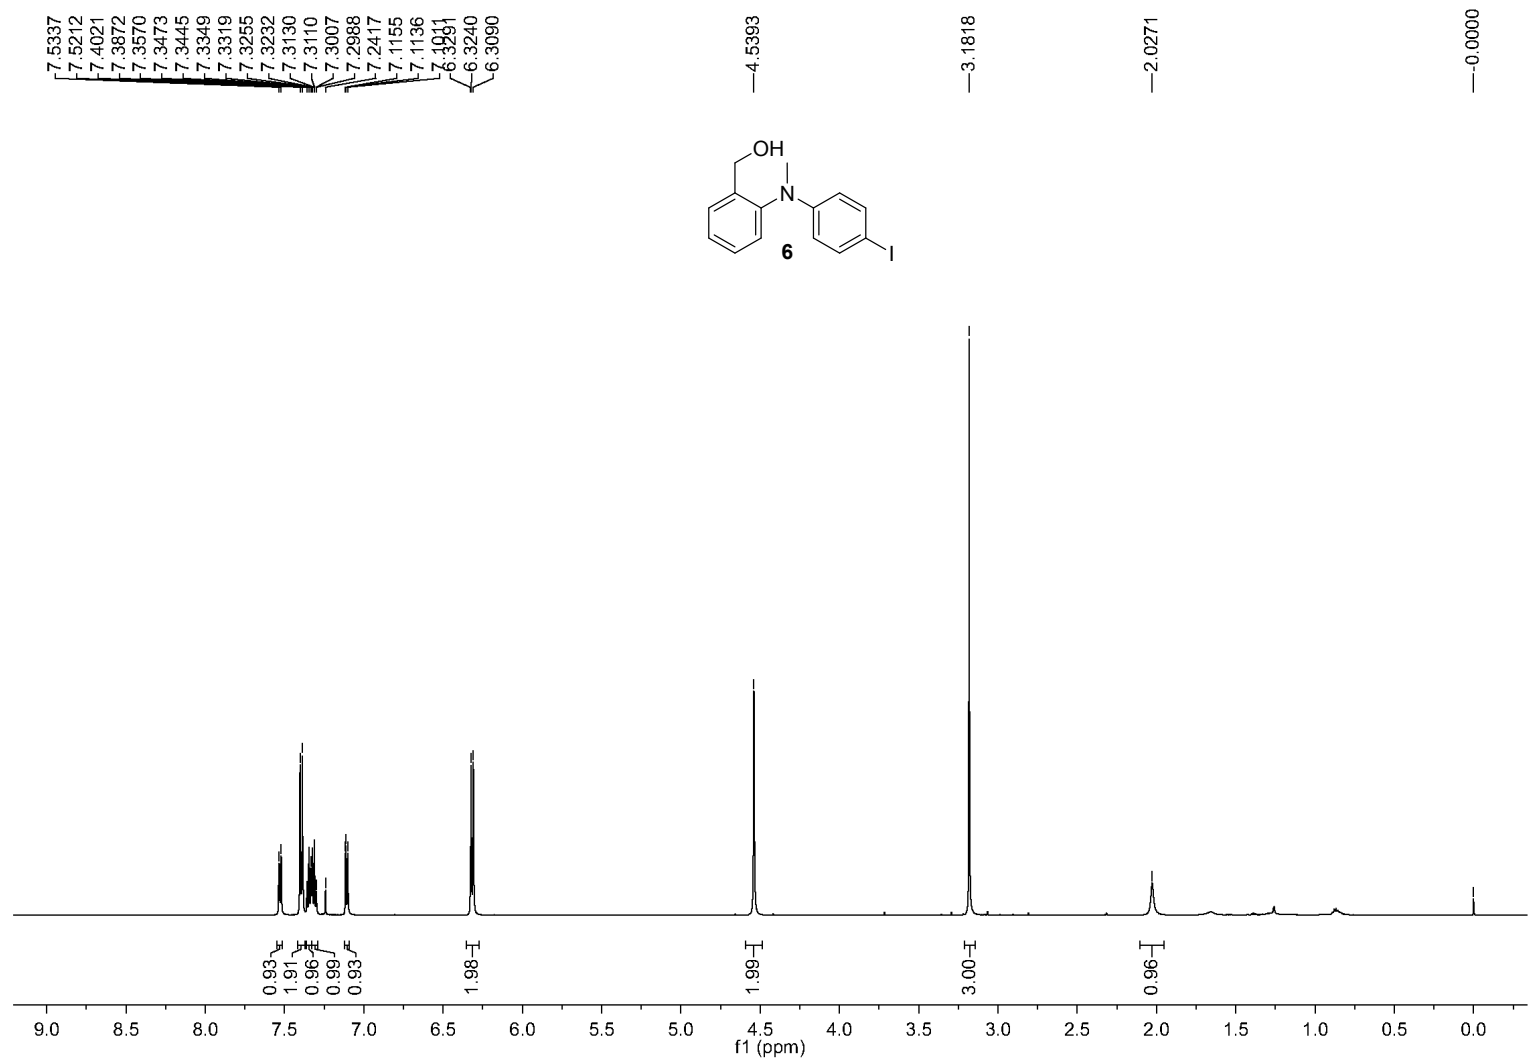

~149.0853  
~145.5753  
~139.0400  
~137.6857  
~129.5372  
~129.0659  
~128.1144  
~127.2944  
—115.7397

~79.0266  
~77.2835  
~77.0720  
~76.8601

—61.8284

—39.8524

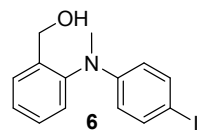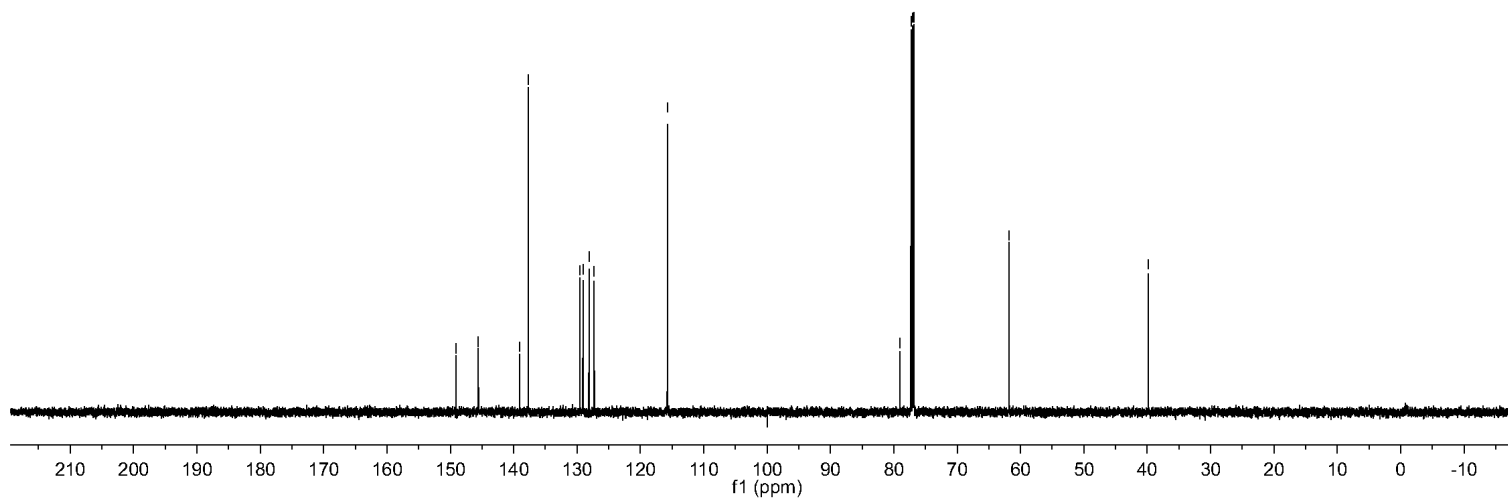

Supplement: c5ra03882k1.pdf [file c5ra03882k1.pdf]
